# Supplementary material for: Spotting the “small eyes”: using photo-ID methodology to study a wild population of smalleye stingrays (Megatrygon microps) in southern Mozambique
Source: PeerJ. 2019 Jun 11;7:e7110. doi: 10.7717/peerj.7110 (PMC6568249; doi:10.7717/peerj.7110)
Supplement: Data S1 — The first two tabs show research dive logs and citizen scientist contributed data on encountered smalleye stingrays (raw data). The last two tabs provide sightings per year and region, and seasonal trends, based on research dive logs only. [file peerj-07-7110-s001.xlsx]

## Sheet: Research Dive Log
Year	Month	Day	Date	Time	Site	Region	BST	M. microps Presence	Number M. microps	Male	Female	Unknown	Photos?	ID Photo
2003	5	14	2003-05-14	0.416667	MR	Tofo/Barra	25	0	0	0	0	0	NA
2003	5	17	2003-05-17	0.395833	MR	Tofo/Barra	24	0	0	0	0	0	NA
2003	5	24	2003-05-24	0.416667	MR	Tofo/Barra	25	0	0	0	0	0	NA
2003	5	26	2003-05-26	0.416667	MR	Tofo/Barra	23	0	0	0	0	0	NA
2003	5	29	2003-05-29	0.416667	MR	Tofo/Barra	24	0	0	0	0	0	NA
2003	8	8	2003-08-08	0.5	MR	Tofo/Barra	22	0	0	0	0	0	NA
2003	8	10	2003-08-10	0.416667	MR	Tofo/Barra	22	0	0	0	0	0	NA
2003	8	13	2003-08-13	0.395833	XTC	Tofo/Barra	22	0	0	0	0	0	NA
2003	8	14	2003-08-14	0.395833	MR	Tofo/Barra	22	0	0	0	0	0	NA
2003	8	15	2003-08-15	0.395833	MR	Tofo/Barra	22	0	0	0	0	0	NA
2003	8	15	2003-08-15	0.604167	PE	Tofo/Barra	22	0	0	0	0	0	NA
2003	8	16	2003-08-16	0.395833	MR	Tofo/Barra	22	0	0	0	0	0	NA
2003	8	17	2003-08-17	0.395833	MR	Tofo/Barra	22	0	0	0	0	0	NA
2003	8	17	2003-08-17	0.458333	Pao	Tofo/Barra	22	0	0	0	0	0	NA
2003	8	18	2003-08-18	0.375	MR	Tofo/Barra	22	0	0	0	0	0	NA
2003	8	19	2003-08-19	0.375	MR	Tofo/Barra	22	0	0	0	0	0	NA
2003	8	19	2003-08-19	0.458333	MR	Tofo/Barra	22	0	0	0	0	0	NA
2003	11	26	2003-11-26	0.395833	MR	Tofo/Barra	24	0	0	0	0	0	NA
2003	11	29	2003-11-29	0.395833	MR	Tofo/Barra	24	0	0	0	0	0	NA
2003	12	2	2003-12-02	0.385417	MR	Tofo/Barra	23	0	0	0	0	0	NA
2003	12	5	2003-12-05	0.427083	MR	Tofo/Barra	26	0	0	0	0	0	NA
2003	12	5	2003-12-05	0.541667	MR	Tofo/Barra	25	0	0	0	0	0	NA
2003	12	6	2003-12-06	0.395833	MR	Tofo/Barra	26	0	0	0	0	0	NA
2003	12	7	2003-12-07	0.395833	MR	Tofo/Barra	25	0	0	0	0	0	NA
2003	12	20	2003-12-20	0.625	MR	Tofo/Barra	26	0	0	0	0	0	NA
2003	12	21	2003-12-21	0.395833	MR	Tofo/Barra	26	0	0	0	0	0	NA
2003	12	22	2003-12-22	0.395833	MR	Tofo/Barra	26	0	0	0	0	0	NA
2003	12	23	2003-12-23	0.4375	MR	Tofo/Barra	26	0	0	0	0	0	NA
2003	12	28	2003-12-28	0.4375	MR	Tofo/Barra	26	0	0	0	0	0	NA
2003	12	29	2003-12-29	0.4375	OF	Tofo/Barra	25	0	0	0	0	0	NA
2003	12	30	2003-12-30	0.416667	MR	Tofo/Barra	26	0	0	0	0	0	NA
2003	12	31	2003-12-31	0.385417	MR	Tofo/Barra	26	0	0	0	0	0	NA
2003	12	31	2003-12-31	0.552083	MR	Tofo/Barra	25	0	0	0	0	0	NA
2004	1	3	2004-01-03	0.3125	MR	Tofo/Barra	26	0	0	0	0	0	NA
2004	1	6	2004-01-06	0.458333	MR	Tofo/Barra	26	0	0	0	0	0	NA
2004	1	11	2004-01-11	0.395833	MR	Tofo/Barra	23	0	0	0	0	0	NA
2004	1	11	2004-01-11	0.5	MR	Tofo/Barra	23	0	0	0	0	0	NA
2004	1	12	2004-01-12	0.395833	MR	Tofo/Barra	24	0	0	0	0	0	NA
2004	1	13	2004-01-13	0.4375	MR	Tofo/Barra	24	0	0	0	0	0	NA
2004	1	15	2004-01-15	0.4375	MR	Tofo/Barra	23	0	0	0	0	0	NA
2004	1	28	2004-01-28	0.333333	MR	Tofo/Barra	25	0	0	0	0	0	NA
2004	1	31	2004-01-31	0.375	MR	Tofo/Barra	27	0	0	0	0	0	NA
2004	5	5	2004-05-05	0.375	MR	Tofo/Barra	26	0	0	0	0	0	NA
2004	5	6	2004-05-06	0.385417	MR	Tofo/Barra	26	0	0	0	0	0	NA
2004	5	7	2004-05-07	0.385417	MR	Tofo/Barra	26	0	0	0	0	0	NA
2004	5	8	2004-05-08	0.385417	MR	Tofo/Barra	25	0	0	0	0	0	NA
2004	5	11	2004-05-11	0.375	MR	Tofo/Barra	26	0	0	0	0	0	NA
2004	5	12	2004-05-12	0.375	MR	Tofo/Barra	26	0	0	0	0	0	NA
2004	5	12	2004-05-12	0.458333	MR	Tofo/Barra	26	0	0	0	0	0	NA
2004	5	13	2004-05-13	0.385417	MR	Tofo/Barra	26	0	0	0	0	0	NA
2004	5	14	2004-05-14	0.395833	MR	Tofo/Barra	26	0	0	0	0	0	NA
2004	5	15	2004-05-15	0.333333	MR	Tofo/Barra	25	0	0	0	0	0	NA
2004	5	16	2004-05-16	0.510417	MR	Tofo/Barra	26	0	0	0	0	0	NA
2004	5	18	2004-05-18	0.5	MR	Tofo/Barra	26	0	0	0	0	0	NA
2004	5	19	2004-05-19	0.364583	MR	Tofo/Barra	26	0	0	0	0	0	NA
2004	5	20	2004-05-20	0.541667	MR	Tofo/Barra	26	0	0	0	0	0	NA
2004	5	22	2004-05-22	0.541667	MR	Tofo/Barra	25	0	0	0	0	0	NA
2004	5	23	2004-05-23	0.4375	MR	Tofo/Barra	25	0	0	0	0	0	NA
2004	7	18	2004-07-18	0.458333	MR	Tofo/Barra	23	0	0	0	0	0	NA
2004	7	18	2004-07-18	0.541667	MR	Tofo/Barra	23	0	0	0	0	0	NA
2004	7	25	2004-07-25	0.479167	MR	Tofo/Barra	21	0	0	0	0	0	NA
2004	7	27	2004-07-27	0.4375	MR	Tofo/Barra	21	0	0	0	0	0	NA
2004	7	27	2004-07-27	0.5	MR	Tofo/Barra	21	0	0	0	0	0	NA
2004	7	28	2004-07-28	0.4375	MR	Tofo/Barra	22	0	0	0	0	0	NA
2004	7	28	2004-07-28	0.520833	MR	Tofo/Barra	22	0	0	0	0	0	NA
2004	9	23	2004-09-23	0.395833	MR	Tofo/Barra	21	0	0	0	0	0	NA
2004	9	25	2004-09-25	0.375	MR	Tofo/Barra	21	0	0	0	0	0	NA
2004	9	26	2004-09-26	0.375	MR	Tofo/Barra	21	0	0	0	0	0	NA
2004	9	29	2004-09-29	0.354167	MR	Tofo/Barra	23	0	0	0	0	0	NA
2004	9	30	2004-09-30	0.385417	MR	Tofo/Barra	24	0	0	0	0	0	NA
2004	10	1	2004-10-01	0.375	GT	Tofo/Barra	24	0	0	0	0	0	NA
2004	10	1	2004-10-01	0.666667	MR	Tofo/Barra	25	0	0	0	0	0	NA
2004	10	3	2004-10-03	0.375	GT	Tofo/Barra	24	0	0	0	0	0	NA
2004	10	4	2004-10-04	0.333333	MR	Tofo/Barra	24	0	0	0	0	0	NA
2004	10	5	2004-10-05	0.333333	MR	Tofo/Barra	22	0	0	0	0	0	NA
2004	10	5	2004-10-05	0.4375	MR	Tofo/Barra	22	0	0	0	0	0	NA
2004	10	6	2004-10-06	0.354167	GT	Tofo/Barra	18	0	0	0	0	0	NA
2004	10	7	2004-10-07	0.354167	MR	Tofo/Barra	14	0	0	0	0	0	NA
2004	10	10	2004-10-10	0.3125	MR	Tofo/Barra	18	0	0	0	0	0	NA
2004	10	11	2004-10-11	0.3125	MR	Tofo/Barra	18	0	0	0	0	0	NA
2004	10	12	2004-10-12	0.541667	MR	Tofo/Barra	24	0	0	0	0	0	NA
2004	10	13	2004-10-13	0.520833	MR	Tofo/Barra	23	0	0	0	0	0	NA
2004	10	14	2004-10-14	0.3125	MR	Tofo/Barra	24	0	0	0	0	0	NA
2004	10	14	2004-10-14	0.520833	MR	Tofo/Barra	24	0	0	0	0	0	NA
2004	10	15	2004-10-15	0.479167	MR	Tofo/Barra	24	0	0	0	0	0	NA
2004	10	17	2004-10-17	0.333333	MR	Tofo/Barra	23	0	0	0	0	0	NA
2004	10	20	2004-10-20	0.354167	MR	Tofo/Barra	24	0	0	0	0	0	NA
2004	10	22	2004-10-22	0.3125	MR	Tofo/Barra	24	0	0	0	0	0	NA
2004	10	23	2004-10-23	0.3125	MR	Tofo/Barra	24	0	0	0	0	0	NA
2004	10	24	2004-10-24	0.3125	MR	Tofo/Barra	24	0	0	0	0	0	NA
2004	10	25	2004-10-25	0.354167	MR	Tofo/Barra	24	0	0	0	0	0	NA
2004	10	27	2004-10-27	0.375	MR	Tofo/Barra	22	0	0	0	0	0	NA
2004	10	28	2004-10-28	0.4375	MR	Tofo/Barra	24	1	1	0	0	1	No
2004	10	29	2004-10-29	0.395833	MR	Tofo/Barra	25	0	0	0	0	0	NA
2004	11	3	2004-11-03	0.333333	MR	Tofo/Barra	24	0	0	0	0	0	NA
2004	11	4	2004-11-04	0.354167	MR	Tofo/Barra	25	0	0	0	0	0	NA
2004	11	4	2004-11-04	0.479167	MR	Tofo/Barra	25	0	0	0	0	0	NA
2004	11	5	2004-11-05	0.354167	MR	Tofo/Barra	25	0	0	0	0	0	NA
2004	11	6	2004-11-06	0.354167	MR	Tofo/Barra	24	0	0	0	0	0	NA
2004	11	7	2004-11-07	0.604167	MR	Tofo/Barra	25	0	0	0	0	0	NA
2004	11	8	2004-11-08	0.354167	MR	Tofo/Barra	24	0	0	0	0	0	NA
2004	11	9	2004-11-09	0.3125	MR	Tofo/Barra	24	0	0	0	0	0	NA
2004	11	9	2004-11-09	0.5	MR	Tofo/Barra	24	0	0	0	0	0	NA
2004	11	10	2004-11-10	0.3125	MR	Tofo/Barra	23	0	0	0	0	0	NA
2004	11	11	2004-11-11	0.3125	MR	Tofo/Barra	21	0	0	0	0	0	NA
2004	11	12	2004-11-12	0.604167	MR	Tofo/Barra	21	0	0	0	0	0	NA
2004	11	16	2004-11-16	0.583333	MR	Tofo/Barra	22	0	0	0	0	0	NA
2004	11	18	2004-11-18	0.3125	MR	Tofo/Barra	23	0	0	0	0	0	NA
2004	11	29	2004-11-29	0.3125	MR	Tofo/Barra	25	0	0	0	0	0	NA
2004	11	30	2004-11-30	0.322917	MR	Tofo/Barra	25	0	0	0	0	0	NA
2004	12	1	2004-12-01	0.3125	MR	Tofo/Barra	24	0	0	0	0	0	NA
2004	12	2	2004-12-02	0.3125	MR	Tofo/Barra	25	0	0	0	0	0	NA
2004	12	3	2004-12-03	0.3125	MR	Tofo/Barra	23	0	0	0	0	0	NA
2004	12	4	2004-12-04	0.3125	MR	Tofo/Barra	23	0	0	0	0	0	NA
2004	12	5	2004-12-05	0.354167	MR	Tofo/Barra	24	0	0	0	0	0	NA
2004	12	6	2004-12-06	0.3125	MR	Tofo/Barra	23	0	0	0	0	0	NA
2004	12	15	2004-12-15	0.520833	MR	Tofo/Barra	26	0	0	0	0	0	NA
2004	12	16	2004-12-16	0.3125	MR	Tofo/Barra	24	0	0	0	0	0	NA
2004	12	17	2004-12-17	0.3125	MR	Tofo/Barra	24	0	0	0	0	0	NA
2004	12	20	2004-12-20	0.479167	MR	Tofo/Barra	24	0	0	0	0	0	NA
2004	12	21	2004-12-21	0.479167	MR	Tofo/Barra	25	0	0	0	0	0	NA
2004	12	22	2004-12-22	0.3125	MR	Tofo/Barra	25	0	0	0	0	0	NA
2004	12	23	2004-12-23	0.395833	MR	Tofo/Barra	25	0	0	0	0	0	NA
2004	12	24	2004-12-24	0.3125	MR	Tofo/Barra	25	0	0	0	0	0	NA
2004	12	25	2004-12-25	0.3125	MR	Tofo/Barra	25	0	0	0	0	0	NA
2004	12	26	2004-12-26	0.3125	MR	Tofo/Barra	24	0	0	0	0	0	NA
2004	12	27	2004-12-27	0.354167	MR	Tofo/Barra	24	0	0	0	0	0	NA
2004	12	28	2004-12-28	0.354167	MR	Tofo/Barra	24	0	0	0	0	0	NA
2004	12	30	2004-12-30	0.40625	MR	Tofo/Barra	23	0	0	0	0	0	NA
2005	1	4	2005-01-04	0.333333	MR	Tofo/Barra	25	0	0	0	0	0	NA
2005	1	10	2005-01-10	0.3125	MR	Tofo/Barra	28	0	0	0	0	0	NA
2005	1	13	2005-01-13	0.3125	MR	Tofo/Barra	26	0	0	0	0	0	NA
2005	1	14	2005-01-14	0.354167	MR	Tofo/Barra	26	0	0	0	0	0	NA
2005	1	15	2005-01-15	0.354167	MR	Tofo/Barra	25	0	0	0	0	0	NA
2005	1	17	2005-01-17	0.604167	MR	Tofo/Barra	25	0	0	0	0	0	NA
2005	1	18	2005-01-18	0.3125	MR	Tofo/Barra	23	0	0	0	0	0	NA
2005	1	19	2005-01-19	0.333333	MR	Tofo/Barra	24	0	0	0	0	0	NA
2005	1	21	2005-01-21	0.3125	MR	Tofo/Barra	24	0	0	0	0	0	NA
2005	1	24	2005-01-24	0.354167	MR	Tofo/Barra	24	0	0	0	0	0	NA
2005	1	24	2005-01-24	0.520833	MR	Tofo/Barra	24	0	0	0	0	0	NA
2005	1	25	2005-01-25	0.291667	MR	Tofo/Barra	25	0	0	0	0	0	NA
2005	1	25	2005-01-25	0.416667	MR	Tofo/Barra	25	0	0	0	0	0	NA
2005	1	26	2005-01-26	0.291667	MR	Tofo/Barra	25	0	0	0	0	0	NA
2005	1	26	2005-01-26	0.416667	MR	Tofo/Barra	25	0	0	0	0	0	NA
2005	1	26	2005-01-26	0.541667	MR	Tofo/Barra	25	0	0	0	0	0	NA
2005	2	1	2005-02-01	0.395833	MR	Tofo/Barra	22	0	0	0	0	0	NA
2005	2	5	2005-02-05	0.447917	MR	Tofo/Barra	23	0	0	0	0	0	NA
2005	4	21	2005-04-21	0.375	MR	Tofo/Barra	25	0	0	0	0	0	NA
2005	5	24	2005-05-24	0.395833	MR	Tofo/Barra	24	0	0	0	0	0	NA
2005	5	26	2005-05-26	0.395833	MR	Tofo/Barra	24	0	0	0	0	0	NA
2005	5	27	2005-05-27	0.395833	MR	Tofo/Barra	24	0	0	0	0	0	NA
2005	5	28	2005-05-28	0.395833	GC	Tofo/Barra	24	0	0	0	0	0	NA
2005	5	29	2005-05-29	0.395833	MR	Tofo/Barra	24	0	0	0	0	0	NA
2005	5	31	2005-05-31	0.395833	MR	Tofo/Barra	24	0	0	0	0	0	NA
2005	6	1	2005-06-01	0.395833	MR	Tofo/Barra	24	0	0	0	0	0	NA
2005	6	3	2005-06-03	0.395833	MR	Tofo/Barra	24	0	0	0	0	0	NA
2005	6	5	2005-06-05	0.479167	GC	Tofo/Barra	24	0	0	0	0	0	NA
2005	6	5	2005-06-05	0.395833	MR	Tofo/Barra	24	0	0	0	0	0	NA
2005	6	7	2005-06-07	0.395833	MR	Tofo/Barra	24	0	0	0	0	0	NA
2005	6	9	2005-06-09	0.395833	MR	Tofo/Barra	24	0	0	0	0	0	NA
2005	6	10	2005-06-10	0.395833	MR	Tofo/Barra	24	0	0	0	0	0	NA
2005	6	11	2005-06-11	0.375	MR	Tofo/Barra	24	0	0	0	0	0	NA
2005	6	27	2005-06-27	0.395833	MR	Tofo/Barra	24	0	0	0	0	0	NA
2005	6	28	2005-06-28	0.395833	MR	Tofo/Barra	24	0	0	0	0	0	NA
2005	6	29	2005-06-29	0.395833	GT	Tofo/Barra	24	0	0	0	0	0	NA
2005	7	26	2005-07-26	0.520833	MR	Tofo/Barra	24	0	0	0	0	0	NA
2005	7	28	2005-07-28	0.416667	MR	Tofo/Barra	24	0	0	0	0	0	NA
2005	7	29	2005-07-29	0.520833	MR	Tofo/Barra	24	0	0	0	0	0	NA
2005	7	29	2005-07-29	0.604167	MR	Tofo/Barra	24	0	0	0	0	0	NA
2005	7	30	2005-07-30	0.385417	MR	Tofo/Barra	24	0	0	0	0	0	NA
2005	10	16	2005-10-16	0.354167	MR	Tofo/Barra	24	0	0	0	0	0	NA
2005	10	18	2005-10-18	0.375	MR	Tofo/Barra	24	0	0	0	0	0	NA
2005	10	19	2005-10-19	0.520833	GC	Tofo/Barra	23	0	0	0	0	0	NA
2005	10	19	2005-10-19	0.375	MR	Tofo/Barra	23	0	0	0	0	0	NA
2005	10	23	2005-10-23	0.375	MR	Tofo/Barra	24	0	0	0	0	0	NA
2005	10	24	2005-10-24	0.458333	MR	Tofo/Barra	24	0	0	0	0	0	NA
2005	10	24	2005-10-24	0.5625	MR	Tofo/Barra	24	0	0	0	0	0	NA
2005	10	25	2005-10-25	0.375	MR	Tofo/Barra	24	0	0	0	0	0	NA
2005	10	27	2005-10-27	0.385417	GC	Tofo/Barra	26	0	0	0	0	0	NA
2005	10	28	2005-10-28	0.395833	MR	Tofo/Barra	26	0	0	0	0	0	NA
2005	10	29	2005-10-29	0.458333	OF	Tofo/Barra	26	0	0	0	0	0	NA
2005	10	30	2005-10-30	0.40625	MR	Tofo/Barra	25	0	0	0	0	0	NA
2005	11	1	2005-11-01	0.333333	MR	Tofo/Barra	26	0	0	0	0	0	NA
2005	11	2	2005-11-02	0.333333	GC	Tofo/Barra	26	1	1	0	0	1	Yes	20051102_Gc_Dm_U_DorsalID_1
2005	11	4	2005-11-04	0.333333	MR	Tofo/Barra	26	0	0	0	0	0	NA
2005	11	6	2005-11-06	0.375	MR	Tofo/Barra	26	0	0	0	0	0	NA
2005	11	7	2005-11-07	0.364583	GC	Tofo/Barra	25	0	0	0	0	0	NA
2005	11	9	2005-11-09	0.395833	MR	Tofo/Barra	24	0	0	0	0	0	NA
2005	11	10	2005-11-10	0.40625	OF	Tofo/Barra	24	0	0	0	0	0	NA
2005	11	11	2005-11-11	0.416667	MR	Tofo/Barra	26	0	0	0	0	0	NA
2005	11	14	2005-11-14	0.375	MR	Tofo/Barra	26	0	0	0	0	0	NA
2005	11	14	2005-11-14	0.46875	MR	Tofo/Barra	26	0	0	0	0	0	NA
2005	11	15	2005-11-15	0.34375	GC	Tofo/Barra	26	0	0	0	0	0	NA
2005	11	18	2005-11-18	0.333333	GC	Tofo/Barra	26	0	0	0	0	0	NA
2005	11	19	2005-11-19	0.375	GC	Tofo/Barra	26	0	0	0	0	0	NA
2005	11	20	2005-11-20	0.395833	MR	Tofo/Barra	26	0	0	0	0	0	NA
2005	11	21	2005-11-21	0.375	GC	Tofo/Barra	26	0	0	0	0	0	NA
2005	11	22	2005-11-22	0.375	MR	Tofo/Barra	26	0	0	0	0	0	NA
2005	11	23	2005-11-23	0.333333	MR	Tofo/Barra	26	0	0	0	0	0	NA
2005	11	24	2005-11-24	0.333333	MR	Tofo/Barra	26	0	0	0	0	0	NA
2005	11	26	2005-11-26	0.333333	GC	Tofo/Barra	24	0	0	0	0	0	NA
2005	11	26	2005-11-26	0.395833	MR	Tofo/Barra	26	0	0	0	0	0	NA
2005	11	28	2005-11-28	0.395833	MR	Tofo/Barra	26	0	0	0	0	0	NA
2005	11	28	2005-11-28	0.520833	MR	Tofo/Barra	26	0	0	0	0	0	NA
2005	11	29	2005-11-29	0.375	MR	Tofo/Barra	25	0	0	0	0	0	NA
2005	11	29	2005-11-29	0.5	MR	Tofo/Barra	25	0	0	0	0	0	NA
2005	11	30	2005-11-30	0.416667	MR	Tofo/Barra	24	0	0	0	0	0	NA
2005	12	1	2005-12-01	0.375	MR	Tofo/Barra	26	0	0	0	0	0	NA
2005	12	2	2005-12-02	0.333333	MR	Tofo/Barra	26	0	0	0	0	0	NA
2005	12	2	2005-12-02	0.4375	MR	Tofo/Barra	26	0	0	0	0	0	NA
2005	12	3	2005-12-03	0.3125	GC	Tofo/Barra	27	0	0	0	0	0	NA
2005	12	5	2005-12-05	0.354167	MR	Tofo/Barra	26	0	0	0	0	0	NA
2005	12	5	2005-12-05	0.479167	MR	Tofo/Barra	26	0	0	0	0	0	NA
2005	12	12	2005-12-12	0.375	MR	Tofo/Barra	26	0	0	0	0	0	NA
2005	12	15	2005-12-15	0.375	MR	Tofo/Barra	26	0	0	0	0	0	NA
2005	12	16	2005-12-16	0.375	GC	Tofo/Barra	25	0	0	0	0	0	NA
2005	12	17	2005-12-17	0.375	MR	Tofo/Barra	25	0	0	0	0	0	NA
2005	12	19	2005-12-19	0.375	MR	Tofo/Barra	25	0	0	0	0	0	NA
2005	12	23	2005-12-23	0.4375	MR	Tofo/Barra	25	0	0	0	0	0	NA
2005	12	26	2005-12-26	0.395833	GC	Tofo/Barra	26	0	0	0	0	0	NA
2005	12	27	2005-12-27	0.395833	MR	Tofo/Barra	26	0	0	0	0	0	NA
2005	12	28	2005-12-28	0.385417	MR	Tofo/Barra	26	0	0	0	0	0	NA
2005	12	29	2005-12-29	0.5	MR	Tofo/Barra	26	0	0	0	0	0	NA
2006	1	2	2006-01-02	0.395833	MR	Tofo/Barra	27	0	0	0	0	0	NA
2006	1	8	2006-01-08	0.375	GC	Tofo/Barra	27	0	0	0	0	0	NA
2006	1	25	2006-01-25	0.395833	MR	Tofo/Barra	28	0	0	0	0	0	NA
2006	1	27	2006-01-27	0.5	MR	Tofo/Barra	29	0	0	0	0	0	NA
2006	1	28	2006-01-28	0.364583	GC	Tofo/Barra	29	0	0	0	0	0	NA
2006	1	29	2006-01-29	0.375	MR	Tofo/Barra	29	0	0	0	0	0	NA
2006	1	31	2006-01-31	0.375	GC	Tofo/Barra	30	0	0	0	0	0	NA
2006	2	4	2006-02-04	0.375	MR	Tofo/Barra	29	0	0	0	0	0	NA
2006	2	6	2006-02-06	0.395833	MR	Tofo/Barra	27	0	0	0	0	0	NA
2006	2	11	2006-02-11	0.416667	MR	Tofo/Barra	20	0	0	0	0	0	NA
2006	2	12	2006-02-12	0.375	GC	Tofo/Barra	25	0	0	0	0	0	NA
2006	2	16	2006-02-16	0.375	MR	Tofo/Barra	26	0	0	0	0	0	NA
2006	2	17	2006-02-17	0.375	GC	Tofo/Barra	26	0	0	0	0	0	NA
2006	2	17	2006-02-17	0.458333	GC	Tofo/Barra	26	0	0	0	0	0	NA
2006	2	18	2006-02-18	0.375	GC	Tofo/Barra	26	0	0	0	0	0	NA
2006	2	19	2006-02-19	0.395833	MR	Tofo/Barra	25	0	0	0	0	0	NA
2006	2	20	2006-02-20	0.375	GC	Tofo/Barra	27	0	0	0	0	0	NA
2006	2	21	2006-02-21	0.395833	MR	Tofo/Barra	28	0	0	0	0	0	NA
2006	2	23	2006-02-23	0.375	MR	Tofo/Barra	29	0	0	0	0	0	NA
2006	3	2	2006-03-02	0.385417	MR	Tofo/Barra	28	0	0	0	0	0	NA
2006	3	3	2006-03-03	0.385417	MR	Tofo/Barra	28	0	0	0	0	0	NA
2006	3	10	2006-03-10	0.364583	GC	Tofo/Barra	28	0	0	0	0	0	NA
2006	3	11	2006-03-11	0.375	MR	Tofo/Barra	28	0	0	0	0	0	NA
2006	3	13	2006-03-13	0.5625	MR	Tofo/Barra	22	0	0	0	0	0	NA
2006	3	15	2006-03-15	0.395833	MR	Tofo/Barra	28	0	0	0	0	0	NA
2006	3	16	2006-03-16	0.375	MR	Tofo/Barra	28	0	0	0	0	0	NA
2006	3	17	2006-03-17	0.375	MR	Tofo/Barra	28	0	0	0	0	0	NA
2006	3	18	2006-03-18	0.375	MR	Tofo/Barra	28	0	0	0	0	0	NA
2006	3	20	2006-03-20	0.5	MR	Tofo/Barra	28	0	0	0	0	0	NA
2006	8	19	2006-08-19	0.395833	MR	Tofo/Barra	24	0	0	0	0	0	NA
2006	8	22	2006-08-22	0.375	MR	Tofo/Barra	24	0	0	0	0	0	NA
2006	8	23	2006-08-23	0.395833	GC	Tofo/Barra	24	1	1	0	1	0	No
2006	8	23	2006-08-23	0.5	MR	Tofo/Barra	23	0	0	0	0	0	NA
2006	9	9	2006-09-09	0.395833	MR	Tofo/Barra	23	0	0	0	0	0	NA
2006	9	13	2006-09-13	0.395833	MR	Tofo/Barra	24	0	0	0	0	0	NA
2006	9	20	2006-09-20	0.395833	MR	Tofo/Barra	22	0	0	0	0	0	NA
2006	9	20	2006-09-20	0.5	MR	Tofo/Barra	22	0	0	0	0	0	NA
2006	9	26	2006-09-26	0.364583	GC	Tofo/Barra	23	0	0	0	0	0	NA
2006	10	6	2006-10-06	0.520833	GC	Tofo/Barra	25	0	0	0	0	0	NA
2006	10	6	2006-10-06	0.395833	MR	Tofo/Barra	25	0	0	0	0	0	NA
2006	10	7	2006-10-07	0.395833	GC	Tofo/Barra	25	0	0	0	0	0	NA
2006	10	10	2006-10-10	0.375	MR	Tofo/Barra	25	0	0	0	0	0	NA
2006	10	11	2006-10-11	0.489583	GC	Tofo/Barra	25	0	0	0	0	0	NA
2006	10	11	2006-10-11	0.395833	MR	Tofo/Barra	25	0	0	0	0	0	NA
2006	10	12	2006-10-12	0.40625	MR	Tofo/Barra	25	0	0	0	0	0	NA
2006	10	13	2006-10-13	0.416667	MR	Tofo/Barra	25	0	0	0	0	0	NA
2006	10	14	2006-10-14	0.375	GC	Tofo/Barra	23	0	0	0	0	0	NA
2006	10	15	2006-10-15	0.416667	MR	Tofo/Barra	23	0	0	0	0	0	NA
2006	10	18	2006-10-18	0.604167	MR	Tofo/Barra	22	0	0	0	0	0	NA
2006	10	19	2006-10-19	0.604167	GC	Tofo/Barra	22	0	0	0	0	0	NA
2006	10	20	2006-10-20	0.4375	MR	Tofo/Barra	24	0	0	0	0	0	NA
2006	10	21	2006-10-21	0.4375	GC	Tofo/Barra	23	0	0	0	0	0	NA
2006	10	21	2006-10-21	0.354167	XTC	Tofo/Barra	23	0	0	0	0	0	NA
2006	10	23	2006-10-23	0.395833	MR	Tofo/Barra	18	0	0	0	0	0	NA
2006	10	24	2006-10-24	0.375	GC	Tofo/Barra	23	0	0	0	0	0	NA
2006	10	24	2006-10-24	0.5	OF	Tofo/Barra	23	0	0	0	0	0	NA
2006	10	25	2006-10-25	0.354167	MR	Tofo/Barra	24	0	0	0	0	0	NA
2006	10	25	2006-10-25	0.489583	MR	Tofo/Barra	24	0	0	0	0	0	NA
2006	10	26	2006-10-26	0.354167	MR	Tofo/Barra	24	0	0	0	0	0	NA
2006	10	26	2006-10-26	0.479167	MR	Tofo/Barra	24	0	0	0	0	0	NA
2006	10	27	2006-10-27	0.395833	GC	Tofo/Barra	21	0	0	0	0	0	NA
2006	10	28	2006-10-28	0.333333	MR	Tofo/Barra	23	0	0	0	0	0	NA
2006	10	29	2006-10-29	0.458333	GC	Tofo/Barra	23	0	0	0	0	0	NA
2006	10	29	2006-10-29	0.333333	MR	Tofo/Barra	20	0	0	0	0	0	NA
2006	11	1	2006-11-01	0.375	MR	Tofo/Barra	24	0	0	0	0	0	NA
2006	11	1	2006-11-01	0.458333	MR	Tofo/Barra	24	0	0	0	0	0	NA
2006	11	2	2006-11-02	0.447917	GC	Tofo/Barra	22	0	0	0	0	0	NA
2006	11	2	2006-11-02	0.3125	MR	Tofo/Barra	23	0	0	0	0	0	NA
2006	11	3	2006-11-03	0.354167	MR	Tofo/Barra	23	0	0	0	0	0	NA
2006	11	4	2006-11-04	0.375	MR	Tofo/Barra	24	0	0	0	0	0	NA
2006	11	9	2006-11-09	0.375	GC	Tofo/Barra	26	0	0	0	0	0	NA
2006	11	10	2006-11-10	0.375	MR	Tofo/Barra	25	0	0	0	0	0	NA
2006	11	15	2006-11-15	0.46875	MR	Tofo/Barra	26	0	0	0	0	0	NA
2006	11	15	2006-11-15	0.375	XTC	Tofo/Barra	26	0	0	0	0	0	NA
2006	11	17	2006-11-17	0.375	MR	Tofo/Barra	26	0	0	0	0	0	NA
2006	11	21	2006-11-21	0.354167	MR	Tofo/Barra	24	0	0	0	0	0	NA
2006	11	22	2006-11-22	0.375	MR	Tofo/Barra	26	0	0	0	0	0	NA
2006	11	23	2006-11-23	0.375	XTC	Tofo/Barra	26	0	0	0	0	0	NA
2006	12	14	2006-12-14	0.375	MR	Tofo/Barra	26	0	0	0	0	0	NA
2006	12	15	2006-12-15	0.520833	GC	Tofo/Barra	27	0	0	0	0	0	NA
2006	12	15	2006-12-15	0.458333	MR	Tofo/Barra	27	0	0	0	0	0	NA
2006	12	16	2006-12-16	0.46875	MR	Tofo/Barra	27	0	0	0	0	0	NA
2006	12	17	2006-12-17	0.458333	MR	Tofo/Barra	26	0	0	0	0	0	NA
2006	12	20	2006-12-20	0.458333	MR	Tofo/Barra	27	0	0	0	0	0	NA
2006	12	21	2006-12-21	0.395833	MR	Tofo/Barra	27	0	0	0	0	0	NA
2006	12	23	2006-12-23	0.447917	MR	Tofo/Barra	28	0	0	0	0	0	NA
2006	12	23	2006-12-23	0.53125	MR	Tofo/Barra	28	0	0	0	0	0	NA
2006	12	27	2006-12-27	0.479167	MR	Tofo/Barra	26	0	0	0	0	0	NA
2006	12	28	2006-12-28	0.479167	MR	Tofo/Barra	25	0	0	0	0	0	NA
2006	12	28	2006-12-28	0.5625	MR	Tofo/Barra	25	0	0	0	0	0	NA
2006	12	29	2006-12-29	0.416667	MR	Tofo/Barra	26	0	0	0	0	0	NA
2007	1	3	2007-01-03	0.375	MR	Tofo/Barra	24	0	0	0	0	0	NA
2007	1	11	2007-01-11	0.375	MR	Tofo/Barra	26	0	0	0	0	0	NA
2007	1	13	2007-01-13	0.447917	MR	Tofo/Barra	26	0	0	0	0	0	NA
2007	1	15	2007-01-15	0.416667	GC	Tofo/Barra	24	0	0	0	0	0	NA
2007	1	15	2007-01-15	0.5	MR	Tofo/Barra	24	0	0	0	0	0	NA
2007	1	16	2007-01-16	0.375	MR	Tofo/Barra	24	0	0	0	0	0	NA
2007	1	17	2007-01-17	0.458333	GC	Tofo/Barra	22	0	0	0	0	0	NA
2007	1	18	2007-01-18	0.4375	MR	Tofo/Barra	23	0	0	0	0	0	NA
2007	1	22	2007-01-22	0.447917	MR	Tofo/Barra	28	0	0	0	0	0	NA
2007	1	22	2007-01-22	0.520833	MR	Tofo/Barra	28	0	0	0	0	0	NA
2007	1	23	2007-01-23	0.5	MR	Tofo/Barra	28	0	0	0	0	0	NA
2007	1	26	2007-01-26	0.447917	MR	Tofo/Barra	27	0	0	0	0	0	NA
2007	1	26	2007-01-26	0.520833	MR	Tofo/Barra	27	0	0	0	0	0	NA
2007	1	29	2007-01-29	0.5	GC	Tofo/Barra	27	0	0	0	0	0	NA
2007	1	30	2007-01-30	0.447917	MR	Tofo/Barra	27	0	0	0	0	0	NA
2007	2	11	2007-02-11	0.395833	MR	Tofo/Barra	26	0	0	0	0	0	NA
2007	2	12	2007-02-12	0.375	MR	Tofo/Barra	25	0	0	0	0	0	NA
2007	2	13	2007-02-13	0.458333	MR	Tofo/Barra	26	0	0	0	0	0	NA
2007	2	16	2007-02-16	0.447917	GC	Tofo/Barra	26	0	0	0	0	0	NA
2007	2	16	2007-02-16	0.510417	MR	Tofo/Barra	26	0	0	0	0	0	NA
2007	2	18	2007-02-18	0.395833	GC	Tofo/Barra	27	0	0	0	0	0	NA
2007	2	19	2007-02-19	0.416667	GC	Tofo/Barra	28	0	0	0	0	0	NA
2007	2	26	2007-02-26	0.395833	GC	Tofo/Barra	27	0	0	0	0	0	NA
2007	2	27	2007-02-27	0.354167	GC	Tofo/Barra	27	0	0	0	0	0	NA
2007	2	28	2007-02-28	0.395833	MR	Tofo/Barra	27	0	0	0	0	0	NA
2007	3	1	2007-03-01	0.4375	GC	Tofo/Barra	27	0	0	0	0	0	NA
2007	3	1	2007-03-01	0.520833	MR	Tofo/Barra	27	0	0	0	0	0	NA
2007	3	2	2007-03-02	0.395833	MR	Tofo/Barra	27	0	0	0	0	0	NA
2007	3	4	2007-03-04	0.354167	GC	Tofo/Barra	27	0	0	0	0	0	NA
2007	3	4	2007-03-04	0.479167	MR	Tofo/Barra	27	0	0	0	0	0	NA
2007	3	5	2007-03-05	0.458333	MR	Tofo/Barra	28	0	0	0	0	0	NA
2007	3	5	2007-03-05	0.354167	XTC	Tofo/Barra	28	0	0	0	0	0	NA
2007	3	6	2007-03-06	0.520833	GC	Tofo/Barra	28	0	0	0	0	0	NA
2007	3	7	2007-03-07	0.416667	GC	Tofo/Barra	28	1	1	0	0	1	No
2007	3	7	2007-03-07	0.479167	GC	Tofo/Barra	28	1	1	0	0	1	No
2007	3	7	2007-03-07	0.354167	MR	Tofo/Barra	28	0	0	0	0	0	NA
2007	3	10	2007-03-10	0.395833	GC	Tofo/Barra	27	0	0	0	0	0	NA
2007	3	12	2007-03-12	0.395833	MR	Tofo/Barra	27	0	0	0	0	0	NA
2007	3	19	2007-03-19	0.395833	GC	Tofo/Barra	27	0	0	0	0	0	NA
2007	3	22	2007-03-22	0.520833	GC	Tofo/Barra	27	0	0	0	0	0	NA
2007	3	22	2007-03-22	0.4375	MR	Tofo/Barra	27	0	0	0	0	0	NA
2007	3	23	2007-03-23	0.395833	GC	Tofo/Barra	27	0	0	0	0	0	NA
2007	3	24	2007-03-24	0.416667	GC	Tofo/Barra	26	0	0	0	0	0	NA
2007	3	24	2007-03-24	0.510417	MR	Tofo/Barra	25	0	0	0	0	0	NA
2007	3	25	2007-03-25	0.375	MR	Tofo/Barra	27	0	0	0	0	0	NA
2007	3	26	2007-03-26	0.40625	MR	Tofo/Barra	25	0	0	0	0	0	NA
2007	3	26	2007-03-26	0.489583	MR	Tofo/Barra	24	0	0	0	0	0	NA
2007	3	27	2007-03-27	0.395833	GC	Tofo/Barra	23	0	0	0	0	0	NA
2007	3	27	2007-03-27	0.46875	MR	Tofo/Barra	23	0	0	0	0	0	NA
2007	3	28	2007-03-28	0.506944	GC	Tofo/Barra	25	0	0	0	0	0	NA
2007	3	29	2007-03-29	0.416667	MR	Tofo/Barra	25	0	0	0	0	0	NA
2007	4	5	2007-04-05	0.395833	GC	Tofo/Barra	28	1	1	0	0	1	No
2007	4	6	2007-04-06	0.5625	GC	Tofo/Barra	24	0	0	0	0	0	NA
2007	4	6	2007-04-06	0.40625	MR	Tofo/Barra	24	0	0	0	0	0	NA
2007	4	6	2007-04-06	0.479167	MR	Tofo/Barra	24	0	0	0	0	0	NA
2007	9	2	2007-09-02	0.4375	MR	Tofo/Barra	24	0	0	0	0	0	NA
2007	9	3	2007-09-03	0.375	MR	Tofo/Barra	24	0	0	0	0	0	NA
2007	9	4	2007-09-04	0.375	MR	Tofo/Barra	24	0	0	0	0	0	NA
2007	9	5	2007-09-05	0.416667	MR	Tofo/Barra	24	0	0	0	0	0	NA
2007	9	6	2007-09-06	0.395833	MR	Tofo/Barra	23	0	0	0	0	0	NA
2007	9	6	2007-09-06	0.479167	MR	Tofo/Barra	23	0	0	0	0	0	NA
2007	9	7	2007-09-07	0.395833	MR	Tofo/Barra	24	0	0	0	0	0	NA
2007	9	9	2007-09-09	0.395833	MR	Tofo/Barra	24	0	0	0	0	0	NA
2007	9	12	2007-09-12	0.385417	MR	Tofo/Barra	23	0	0	0	0	0	NA
2007	9	12	2007-09-12	0.34375	XTC	Tofo/Barra	23	0	0	0	0	0	NA
2007	9	13	2007-09-13	0.385417	GC	Tofo/Barra	23	0	0	0	0	0	NA
2007	9	14	2007-09-14	0.375	MR	Tofo/Barra	23	0	0	0	0	0	NA
2007	9	15	2007-09-15	0.46875	GC	Tofo/Barra	24	0	0	0	0	0	NA
2007	9	16	2007-09-16	0.385417	GC	Tofo/Barra	23	0	0	0	0	0	NA
2007	9	16	2007-09-16	0.447917	GC	Tofo/Barra	23	0	0	0	0	0	NA
2007	9	20	2007-09-20	0.375	MR	Tofo/Barra	23	0	0	0	0	0	NA
2007	9	20	2007-09-20	0.4375	MR	Tofo/Barra	23	0	0	0	0	0	NA
2007	9	21	2007-09-21	0.375	MR	Tofo/Barra	22	0	0	0	0	0	NA
2007	9	21	2007-09-21	0.440972	MR	Tofo/Barra	23	0	0	0	0	0	NA
2007	9	21	2007-09-21	0.375	OF	Tofo/Barra	23	0	0	0	0	0	NA
2007	9	22	2007-09-22	0.354167	GC	Tofo/Barra	23	1	1	0	0	1	No
2007	9	24	2007-09-24	0.385417	MR	Tofo/Barra	23	0	0	0	0	0	NA
2007	9	24	2007-09-24	0.427083	MR	Tofo/Barra	23	0	0	0	0	0	NA
2007	9	26	2007-09-26	0.385417	GC	Tofo/Barra	24	0	0	0	0	0	NA
2007	9	27	2007-09-27	0.385417	GC	Tofo/Barra	24	1	1	1	0	0	No
2007	10	4	2007-10-04	0.458333	GC	Tofo/Barra	20	1	1	0	0	1	No
2007	10	4	2007-10-04	0.40625	MR	Tofo/Barra	20	0	0	0	0	0	NA
2007	10	5	2007-10-05	0.395833	GC	Tofo/Barra	20	0	0	0	0	0	NA
2007	10	6	2007-10-06	0.416667	MR	Tofo/Barra	20	0	0	0	0	0	NA
2007	10	6	2007-10-06	0.5	MR	Tofo/Barra	20	0	0	0	0	0	NA
2007	10	7	2007-10-07	0.427083	MR	Tofo/Barra	21	0	0	0	0	0	NA
2007	10	7	2007-10-07	0.5	MR	Tofo/Barra	21	0	0	0	0	0	NA
2007	10	8	2007-10-08	0.489583	GC	Tofo/Barra	21	0	0	0	0	0	NA
2007	10	8	2007-10-08	0.40625	MR	Tofo/Barra	22	0	0	0	0	0	NA
2007	10	9	2007-10-09	0.427083	OF	Tofo/Barra	21	0	0	0	0	0	NA
2007	10	9	2007-10-09	0.5	OF	Tofo/Barra	21	0	0	0	0	0	NA
2007	10	11	2007-10-11	0.5	GC	Tofo/Barra	23	0	0	0	0	0	NA
2007	10	12	2007-10-12	0.416667	GC	Tofo/Barra	23	0	0	0	0	0	NA
2007	10	12	2007-10-12	0.354167	MR	Tofo/Barra	23	0	0	0	0	0	NA
2007	10	15	2007-10-15	0.416667	XTC	Tofo/Barra	23	0	0	0	0	0	NA
2007	10	15	2007-10-15	0.479167	XTC	Tofo/Barra	23	0	0	0	0	0	NA
2007	10	16	2007-10-16	0.385417	MR	Tofo/Barra	23	0	0	0	0	0	NA
2007	10	16	2007-10-16	0.458333	XTC	Tofo/Barra	23	0	0	0	0	0	NA
2007	10	17	2007-10-17	0.458333	GC	Tofo/Barra	22	0	0	0	0	0	NA
2007	10	17	2007-10-17	0.375	MR	Tofo/Barra	21	0	0	0	0	0	NA
2007	10	18	2007-10-18	0.427083	MR	Tofo/Barra	23	0	0	0	0	0	NA
2007	10	18	2007-10-18	0.375	XTC	Tofo/Barra	21	0	0	0	0	0	NA
2007	10	20	2007-10-20	0.375	GC	Tofo/Barra	24	0	0	0	0	0	NA
2007	10	22	2007-10-22	0.4375	GC	Tofo/Barra	24	0	0	0	0	0	NA
2007	10	22	2007-10-22	0.354167	MR	Tofo/Barra	24	0	0	0	0	0	NA
2007	10	23	2007-10-23	0.479167	GC	Tofo/Barra	24	0	0	0	0	0	NA
2007	10	23	2007-10-23	0.4375	MR	Tofo/Barra	24	0	0	0	0	0	NA
2007	10	28	2007-10-28	0.34375	GC	Tofo/Barra	24	1	1	0	0	1	No
2007	10	29	2007-10-29	0.479167	MR	Tofo/Barra	21	0	0	0	0	0	NA
2007	10	29	2007-10-29	0.395833	XTC	Tofo/Barra	21	0	0	0	0	0	NA
2007	10	30	2007-10-30	0.447917	GC	Tofo/Barra	21	0	0	0	0	0	NA
2007	10	30	2007-10-30	0.375	MR	Tofo/Barra	21	0	0	0	0	0	NA
2007	10	31	2007-10-31	0.364583	GC	Tofo/Barra	21	0	0	0	0	0	NA
2007	10	31	2007-10-31	0.416667	GC	Tofo/Barra	21	0	0	0	0	0	NA
2007	11	1	2007-11-01	0.364583	MR	Tofo/Barra	22	0	0	0	0	0	NA
2007	11	1	2007-11-01	0.451389	MR	Tofo/Barra	22	0	0	0	0	0	NA
2007	11	1	2007-11-01	0.447917	XTC	Tofo/Barra	22	0	0	0	0	0	NA
2007	11	3	2007-11-03	0.416667	MR	Tofo/Barra	22	0	0	0	0	0	NA
2007	11	3	2007-11-03	0.354167	XTC	Tofo/Barra	22	0	0	0	0	0	NA
2007	11	6	2007-11-06	0.395833	OF	Tofo/Barra	20	0	0	0	0	0	NA
2007	11	6	2007-11-06	0.4375	OF	Tofo/Barra	20	0	0	0	0	0	NA
2007	11	7	2007-11-07	0.375	GC	Tofo/Barra	21	0	0	0	0	0	NA
2007	11	7	2007-11-07	0.4375	GC	Tofo/Barra	21	0	0	0	0	0	NA
2007	11	8	2007-11-08	0.395833	MR	Tofo/Barra	22	0	0	0	0	0	NA
2007	11	8	2007-11-08	0.479167	MR	Tofo/Barra	22	0	0	0	0	0	NA
2008	2	25	2008-02-25	0.395833	MR	Tofo/Barra	26	0	0	0	0	0	NA
2008	2	25	2008-02-25	0.479167	MR	Tofo/Barra	26	0	0	0	0	0	NA
2008	2	27	2008-02-27	0.375	MR	Tofo/Barra	26	0	0	0	0	0	NA
2008	2	28	2008-02-28	0.447917	MR	Tofo/Barra	26	0	0	0	0	0	NA
2008	2	28	2008-02-28	0.53125	MR	Tofo/Barra	26	0	0	0	0	0	NA
2008	2	29	2008-02-29	0.385417	XTC	Tofo/Barra	26	0	0	0	0	0	NA
2008	3	1	2008-03-01	0.46875	GC	Tofo/Barra	26	0	0	0	0	0	NA
2008	3	1	2008-03-01	0.395833	OF	Tofo/Barra	26	0	0	0	0	0	NA
2008	3	2	2008-03-02	0.458333	MR	Tofo/Barra	24	0	0	0	0	0	NA
2008	3	3	2008-03-03	0.4375	MR	Tofo/Barra	23	0	0	0	0	0	NA
2008	3	3	2008-03-03	0.375	XTC	Tofo/Barra	23	0	0	0	0	0	NA
2008	3	4	2008-03-04	0.375	MR	Tofo/Barra	25	0	0	0	0	0	NA
2008	3	4	2008-03-04	0.46875	MR	Tofo/Barra	26	0	0	0	0	0	NA
2008	3	5	2008-03-05	0.395833	MR	Tofo/Barra	26	0	0	0	0	0	NA
2008	10	28	2008-10-28	0.5625	GC	Tofo/Barra	23	0	0	0	0	0	NA
2008	10	28	2008-10-28	0.416667	MR	Tofo/Barra	23	0	0	0	0	0	NA
2008	10	29	2008-10-29	0.416667	MR	Tofo/Barra	22	0	0	0	0	0	NA
2008	10	30	2008-10-30	0.479167	MR	Tofo/Barra	24	0	0	0	0	0	NA
2008	10	30	2008-10-30	0.395833	XTC	Tofo/Barra	24	0	0	0	0	0	NA
2008	10	31	2008-10-31	0.395833	MR	Tofo/Barra	24	0	0	0	0	0	NA
2008	10	31	2008-10-31	0.5	XTC	Tofo/Barra	25	0	0	0	0	0	NA
2008	11	2	2008-11-02	0.416667	GC	Tofo/Barra	23	0	0	0	0	0	NA
2008	11	5	2008-11-05	0.375	MR	Tofo/Barra	22	0	0	0	0	0	NA
2008	11	7	2008-11-07	0.375	MR	Tofo/Barra	22	0	0	0	0	0	NA
2008	11	7	2008-11-07	0.541667	MR	Tofo/Barra	22	0	0	0	0	0	NA
2008	11	10	2008-11-10	0.458333	GC	Tofo/Barra	24	0	0	0	0	0	NA
2008	11	10	2008-11-10	0.375	MR	Tofo/Barra	22	1	1	0	0	1	No
2008	11	11	2008-11-11	0.364583	MR	Tofo/Barra	23	0	0	0	0	0	NA
2008	11	12	2008-11-12	0.447917	MR	Tofo/Barra	22	0	0	0	0	0	NA
2008	11	13	2008-11-13	0.479167	MR	Tofo/Barra	21	0	0	0	0	0	NA
2008	11	13	2008-11-13	0.40625	XTC	Tofo/Barra	22	0	0	0	0	0	NA
2008	11	14	2008-11-14	0.46875	GC	Tofo/Barra	22	0	0	0	0	0	NA
2008	11	14	2008-11-14	0.354167	MR	Tofo/Barra	22	0	0	0	0	0	NA
2008	11	15	2008-11-15	0.354167	MR	Tofo/Barra	20	0	0	0	0	0	NA
2008	11	16	2008-11-16	NA	MR	Tofo/Barra	NA	0	0	0	0	0	NA
2008	11	17	2008-11-17	NA	MR	Tofo/Barra	NA	0	0	0	0	0	NA
2008	11	18	2008-11-18	NA	MR	Tofo/Barra	NA	0	0	0	0	0	NA
2008	11	19	2008-11-19	NA	MR	Tofo/Barra	NA	0	0	0	0	0	NA
2008	11	20	2008-11-20	NA	MR	Tofo/Barra	NA	0	0	0	0	0	NA
2008	11	21	2008-11-21	NA	MR	Tofo/Barra	NA	0	0	0	0	0	NA
2008	11	22	2008-11-22	NA	MR	Tofo/Barra	NA	0	0	0	0	0	NA
2008	11	23	2008-11-23	NA	MR	Tofo/Barra	NA	0	0	0	0	0	NA
2008	11	25	2008-11-25	0.458333	MR	Tofo/Barra	27	0	0	0	0	0	NA
2008	11	27	2008-11-27	0.5	GC	Tofo/Barra	26	0	0	0	0	0	NA
2008	11	27	2008-11-27	0.416667	MR	Tofo/Barra	26	0	0	0	0	0	NA
2008	12	6	2008-12-06	0.395833	MR	Tofo/Barra	29	0	0	0	0	0	NA
2008	12	6	2008-12-06	0.479167	MR	Tofo/Barra	29	0	0	0	0	0	NA
2008	12	7	2008-12-07	0.385417	MR	Tofo/Barra	25	0	0	0	0	0	NA
2008	12	9	2008-12-09	0.510417	GC	Tofo/Barra	25	1	1	0	0	1	Yes	20081209_GC_Dm_U_DorsalID_DSC_0051 and 20081209_GC_Dm_U_DorsalID_DSC_0052
2008	12	9	2008-12-09	0.427083	MR	Tofo/Barra	25	0	0	0	0	0	NA
2009	2	9	2009-02-09	0.520833	GC	Tofo/Barra	27	0	0	0	0	0	NA
2009	2	9	2009-02-09	0.427083	MR	Tofo/Barra	27	0	0	0	0	0	NA
2009	2	11	2009-02-11	0.520833	GC	Tofo/Barra	27	0	0	0	0	0	NA
2009	2	11	2009-02-11	0.416667	MR	Tofo/Barra	27	0	0	0	0	0	NA
2009	2	15	2009-02-15	0.40625	GC	Tofo/Barra	27	0	0	0	0	0	NA
2009	2	17	2009-02-17	0.4375	MR	Tofo/Barra	30	0	0	0	0	0	NA
2009	2	17	2009-02-17	0.5	MR	Tofo/Barra	30	0	0	0	0	0	NA
2009	2	19	2009-02-19	0.5	MR	Tofo/Barra	30	0	0	0	0	0	NA
2009	2	20	2009-02-20	0.479167	MR	Tofo/Barra	26	0	0	0	0	0	NA
2009	2	20	2009-02-20	0.604167	MR	Tofo/Barra	26	0	0	0	0	0	NA
2009	2	20	2009-02-20	0.375	XTC	Tofo/Barra	26	0	0	0	0	0	NA
2009	2	21	2009-02-21	0.5	GC	Tofo/Barra	25	0	0	0	0	0	NA
2009	2	21	2009-02-21	0.375	XTC	Tofo/Barra	25	0	0	0	0	0	NA
2009	2	25	2009-02-25	0.375	GC	Tofo/Barra	24	0	0	0	0	0	NA
2009	2	25	2009-02-25	0.479167	MR	Tofo/Barra	26	0	0	0	0	0	NA
2009	2	26	2009-02-26	0.385417	MR	Tofo/Barra	24	0	0	0	0	0	NA
2009	2	26	2009-02-26	0.5	MR	Tofo/Barra	22	0	0	0	0	0	NA
2009	2	27	2009-02-27	0.375	MR	Tofo/Barra	24	0	0	0	0	0	NA
2009	2	27	2009-02-27	0.46875	MR	Tofo/Barra	24	0	0	0	0	0	NA
2009	2	28	2009-02-28	0.479167	MR	Tofo/Barra	24	0	0	0	0	0	NA
2009	2	28	2009-02-28	0.395833	XTC	Tofo/Barra	24	0	0	0	0	0	NA
2009	4	9	2009-04-09	0.395833	GC	Tofo/Barra	26	0	0	0	0	0	NA
2009	4	9	2009-04-09	0.46875	GC	Tofo/Barra	25	0	0	0	0	0	NA
2009	4	13	2009-04-13	0.395833	MR	Tofo/Barra	27	0	0	0	0	0	NA
2009	4	13	2009-04-13	0.479167	MR	Tofo/Barra	27	0	0	0	0	0	NA
2009	4	15	2009-04-15	0.416667	GC	Tofo/Barra	26	0	0	0	0	0	NA
2009	4	15	2009-04-15	0.5	GC	Tofo/Barra	25	0	0	0	0	0	NA
2009	4	19	2009-04-19	0.364583	OF	Tofo/Barra	24	0	0	0	0	0	NA
2009	4	20	2009-04-20	0.375	MR	Tofo/Barra	25	0	0	0	0	0	NA
2009	4	22	2009-04-22	0.395833	MR	Tofo/Barra	25	0	0	0	0	0	NA
2009	4	23	2009-04-23	0.364583	XTC	Tofo/Barra	23	0	0	0	0	0	NA
2009	4	25	2009-04-25	0.375	XTC	Tofo/Barra	23	0	0	0	0	0	NA
2009	4	28	2009-04-28	0.385417	XTC	Tofo/Barra	24	0	0	0	0	0	NA
2009	4	30	2009-04-30	0.375	GC	Tofo/Barra	25	0	0	0	0	0	NA
2009	4	30	2009-04-30	0.458333	MR	Tofo/Barra	25	0	0	0	0	0	NA
2009	4	30	2009-04-30	0.5625	MR	Tofo/Barra	25	0	0	0	0	0	NA
2009	5	1	2009-05-01	0.395833	MR	Tofo/Barra	NA	0	0	0	0	0	NA
2009	5	4	2009-05-04	0.375	MR	Tofo/Barra	NA	0	0	0	0	0	NA
2009	5	19	2009-05-19	0.46875	MR	Tofo/Barra	23	0	0	0	0	0	NA
2009	6	1	2009-06-01	0.552083	GC	Tofo/Barra	24	0	0	0	0	0	NA
2009	6	1	2009-06-01	0.416667	MR	Tofo/Barra	24	0	0	0	0	0	NA
2009	6	2	2009-06-02	0.40625	MR	Tofo/Barra	24	0	0	0	0	0	NA
2009	6	4	2009-06-04	0.427083	MR	Tofo/Barra	23	0	0	0	0	0	NA
2009	6	4	2009-06-04	0.510417	MR	Tofo/Barra	23	0	0	0	0	0	NA
2009	6	5	2009-06-05	0.5	GC	Tofo/Barra	22	0	0	0	0	0	NA
2009	6	5	2009-06-05	0.40625	MR	Tofo/Barra	22	0	0	0	0	0	NA
2009	6	8	2009-06-08	0.333333	GC	Tofo/Barra	22	1	1	0	0	1	No
2009	6	11	2009-06-11	0.416667	GC	Tofo/Barra	22	0	0	0	0	0	NA
2009	6	11	2009-06-11	0.479167	GC	Tofo/Barra	22	0	0	0	0	0	NA
2009	6	18	2009-06-18	0.458333	PE	Tofo/Barra	24	0	0	0	0	0	NA
2009	8	11	2009-08-11	0.583333	GC	Tofo/Barra	22	0	0	0	0	0	NA
2009	8	18	2009-08-18	0.375	MR	Tofo/Barra	18	0	0	0	0	0	NA
2009	8	24	2009-08-24	0.375	MR	Tofo/Barra	18	0	0	0	0	0	NA
2009	8	26	2009-08-26	0.416667	MR	Tofo/Barra	23	0	0	0	0	0	NA
2009	8	27	2009-08-27	0.53125	GC	Tofo/Barra	23	0	0	0	0	0	NA
2009	8	27	2009-08-27	0.416667	MR	Tofo/Barra	22	0	0	0	0	0	NA
2009	8	31	2009-08-31	0.4375	PE	Tofo/Barra	22	0	0	0	0	0	NA
2009	9	3	2009-09-03	0.510417	OF	Tofo/Barra	23	0	0	0	0	0	NA
2009	9	9	2009-09-09	0.4375	MR	Tofo/Barra	20	0	0	0	0	0	NA
2009	9	10	2009-09-10	0.427083	GC	Tofo/Barra	22	0	0	0	0	0	NA
2009	9	10	2009-09-10	0.354167	MR	Tofo/Barra	22	0	0	0	0	0	NA
2009	10	26	2009-10-26	0.5625	GC	Tofo/Barra	23	0	0	0	0	0	NA
2009	10	26	2009-10-26	0.416667	OF	Tofo/Barra	21	0	0	0	0	0	NA
2009	10	27	2009-10-27	0.416667	MR	Tofo/Barra	18	0	0	0	0	0	NA
2010	1	2	2010-01-02	0.53125	GC	Tofo/Barra	26	0	0	0	0	0	NA
2010	1	2	2010-01-02	0.447917	MR	Tofo/Barra	25	0	0	0	0	0	NA
2010	1	7	2010-01-07	0.375	SA	Tofo/Barra	26	0	0	0	0	0	NA
2010	1	8	2010-01-08	0.375	RS	Zavora	27	0	0	0	0	0	NA
2010	1	17	2010-01-17	0.604167	OF	Tofo/Barra	27	0	0	0	0	0	NA
2010	1	18	2010-01-18	0.5625	GC	Tofo/Barra	24	0	0	0	0	0	NA
2010	1	18	2010-01-18	0.40625	MR	Tofo/Barra	28	0	0	0	0	0	NA
2010	1	19	2010-01-19	0.572917	GC	Tofo/Barra	26	0	0	0	0	0	NA
2010	1	19	2010-01-19	0.40625	MR	Tofo/Barra	26	0	0	0	0	0	NA
2010	1	22	2010-01-22	0.40625	SA	Tofo/Barra	26	0	0	0	0	0	NA
2010	1	22	2010-01-22	0.40625	WS	Zavora	26	0	0	0	0	0	NA
2010	1	23	2010-01-23	0.395833	MR	Tofo/Barra	23	0	0	0	0	0	NA
2010	1	25	2010-01-25	0.489583	GC	Tofo/Barra	23	0	0	0	0	0	NA
2010	1	25	2010-01-25	0.40625	MR	Tofo/Barra	24	0	0	0	0	0	NA
2010	1	26	2010-01-26	0.416667	OF	Tofo/Barra	26	0	0	0	0	0	NA
2010	1	27	2010-01-27	0.395833	MR	Tofo/Barra	26	0	0	0	0	0	NA
2010	1	29	2010-01-29	0.395833	OF	Tofo/Barra	28	0	0	0	0	0	NA
2010	1	29	2010-01-29	0.479167	OF	Tofo/Barra	28	0	0	0	0	0	NA
2010	2	12	2010-02-12	0.375	GC	Tofo/Barra	21	0	0	0	0	0	NA
2010	2	25	2010-02-25	0.489583	MR	Tofo/Barra	27	0	0	0	0	0	NA
2010	2	25	2010-02-25	0.458333	OF	Tofo/Barra	27	0	0	0	0	0	NA
2010	2	25	2010-02-25	0.416667	XTC	Tofo/Barra	28	0	0	0	0	0	NA
2010	2	26	2010-02-26	0.364583	GC	Tofo/Barra	27	0	0	0	0	0	NA
2010	2	26	2010-02-26	0.458333	GC	Tofo/Barra	27	0	0	0	0	0	NA
2010	2	27	2010-02-27	0.40625	SF	Tofo/Barra	27	0	0	0	0	0	NA
2010	2	28	2010-02-28	0.375	GC	Tofo/Barra	27	0	0	0	0	0	NA
2010	2	28	2010-02-28	0.458333	GC	Tofo/Barra	27	0	0	0	0	0	NA
2010	3	8	2010-03-08	0.375	GC	Tofo/Barra	25	0	0	0	0	0	NA
2010	3	9	2010-03-09	0.416667	GC	Tofo/Barra	26	0	0	0	0	0	NA
2010	3	10	2010-03-10	0.375	MR	Tofo/Barra	25	0	0	0	0	0	NA
2010	3	12	2010-03-12	NA	GC	Tofo/Barra	27	0	0	0	0	0	NA
2010	3	12	2010-03-12	NA	MR	Tofo/Barra	27	0	0	0	0	0	NA
2010	3	13	2010-03-13	0.416667	CO	Tofo/Barra	25	0	0	0	0	0	NA
2010	3	13	2010-03-13	0.541667	Of	Tofo/Barra	27	0	0	0	0	0	NA
2010	3	14	2010-03-14	0.375	GC	Tofo/Barra	27	0	0	0	0	0	NA
2010	3	14	2010-03-14	0.416667	OF	Tofo/Barra	27	0	0	0	0	0	NA
2010	3	15	2010-03-15	0.416667	MR	Tofo/Barra	27	0	0	0	0	0	NA
2010	3	16	2010-03-16	0.416667	GC	Tofo/Barra	27	0	0	0	0	0	NA
2010	3	16	2010-03-16	0.395833	SF	Tofo/Barra	28	0	0	0	0	0	NA
2010	3	17	2010-03-17	0.375	AM	Tofo/Barra	27	0	0	0	0	0	NA
2010	3	17	2010-03-17	0.4375	GC	Tofo/Barra	27	0	0	0	0	0	NA
2010	3	17	2010-03-17	0.541667	GC	Tofo/Barra	27	0	0	0	0	0	NA
2010	3	17	2010-03-17	0.479167	Of	Tofo/Barra	28	0	0	0	0	0	NA
2010	3	30	2010-03-30	0.416667	MR	Tofo/Barra	27	0	0	0	0	0	NA
2010	3	31	2010-03-31	0.520833	MR	Tofo/Barra	27	0	0	0	0	0	NA
2010	3	31	2010-03-31	0.40625	XTC	Tofo/Barra	27	0	0	0	0	0	NA
2010	4	1	2010-04-01	0.395833	GC	Tofo/Barra	27	0	0	0	0	0	NA
2010	4	2	2010-04-02	0.53125	GC	Tofo/Barra	28	0	0	0	0	0	NA
2010	4	2	2010-04-02	0.427083	MR	Tofo/Barra	28	0	0	0	0	0	NA
2010	4	3	2010-04-03	0.423611	GT	Tofo/Barra	23	0	0	0	0	0	NA
2010	4	3	2010-04-03	0.510417	MR	Tofo/Barra	28	0	0	0	0	0	NA
2010	4	5	2010-04-05	0.395833	MR	Tofo/Barra	27	0	0	0	0	0	NA
2010	4	5	2010-04-05	0.399306	MR	Tofo/Barra	27	0	0	0	0	0	NA
2010	4	6	2010-04-06	0.395833	GC	Tofo/Barra	25	0	0	0	0	0	NA
2010	4	12	2010-04-12	0.364583	TT	Tofo/Barra	28	0	0	0	0	0	NA
2010	4	13	2010-04-13	0.375	GC	Tofo/Barra	27	0	0	0	0	0	NA
2010	4	13	2010-04-13	0.376389	GC	Tofo/Barra	27	0	0	0	0	0	NA
2010	4	13	2010-04-13	0.489583	SF	Tofo/Barra	27	0	0	0	0	0	NA
2010	4	14	2010-04-14	0.40625	XTC	Tofo/Barra	28	1	1	0	0	1	Yes	20100414_XTC_Dm_U_LeftID_MVI_4302
2010	4	16	2010-04-16	0.364583	GC	Tofo/Barra	27	0	0	0	0	0	NA
2010	4	18	2010-04-18	0.375	GC	Tofo/Barra	27	0	0	0	0	0	NA
2010	4	19	2010-04-19	0.375	MR	Tofo/Barra	26	0	0	0	0	0	NA
2010	4	20	2010-04-20	0.375	MR	Tofo/Barra	26	0	0	0	0	0	NA
2010	4	21	2010-04-21	0.375	GC	Tofo/Barra	26	0	0	0	0	0	NA
2010	4	22	2010-04-22	0.375	Of	Tofo/Barra	28	0	0	0	0	0	NA
2010	4	23	2010-04-23	0.375	MR	Tofo/Barra	26	0	0	0	0	0	NA
2010	4	26	2010-04-26	0.364583	GC	Tofo/Barra	26	0	0	0	0	0	NA
2010	4	27	2010-04-27	0.364583	Of	Tofo/Barra	24	0	0	0	0	0	NA
2010	4	28	2010-04-28	0.40625	MR	Tofo/Barra	26	0	0	0	0	0	NA
2010	4	28	2010-04-28	0.458333	MR	Tofo/Barra	26	0	0	0	0	0	NA
2010	4	30	2010-04-30	0.552083	BA	Tofo/Barra	25	0	0	0	0	0	NA
2010	4	30	2010-04-30	0.458333	MR	Tofo/Barra	26	0	0	0	0	0	NA
2010	5	1	2010-05-01	0.416667	GC	Tofo/Barra	26	0	0	0	0	0	NA
2010	4	31	2010-05-01	0.447917	MR	Tofo/Barra	27	0	0	0	0	0	NA
2010	5	2	2010-05-02	0.395833	MR	Tofo/Barra	26	0	0	0	0	0	NA
2010	5	5	2010-05-05	0.427083	GC	Tofo/Barra	25	0	0	0	0	0	NA
2010	5	5	2010-05-05	0.5	GC	Tofo/Barra	25	1	1	0	0	1	Yes	20100505_GC_Dm_U_Dorsal_ and 20100505_GC_Dm_U_DorsalID2_
2010	5	7	2010-05-07	0.5	PE	Tofo/Barra	26	0	0	0	0	0	NA
2010	5	10	2010-05-10	0.375	MR	Tofo/Barra	24	0	0	0	0	0	NA
2010	5	12	2010-05-12	0.375	WS	Zavora	27	0	0	0	0	0	NA
2010	5	14	2010-05-14	0.375	ARC	Zavora	22	0	0	0	0	0	NA
2010	5	14	2010-05-14	0.479167	WS	Zavora	26	0	0	0	0	0	NA
2010	5	15	2010-05-15	0.416667	RS	Zavora	26	0	0	0	0	0	NA
2010	5	15	2010-05-15	0.510417	WS	Zavora	27	0	0	0	0	0	NA
2010	5	16	2010-05-16	0.375	GC	Tofo/Barra	25	0	0	0	0	0	NA
2010	5	21	2010-05-21	0.375	MR	Tofo/Barra	27	0	0	0	0	0	NA
2010	5	22	2010-05-22	0.572917	SA	Tofo/Barra	27	0	0	0	0	0	NA
2010	5	25	2010-05-25	0.395833	MR	Tofo/Barra	24	0	0	0	0	0	NA
2010	5	26	2010-05-26	0.520833	GC	Tofo/Barra	24	0	0	0	0	0	NA
2010	5	27	2010-05-27	0.447917	GC	Tofo/Barra	26	0	0	0	0	0	NA
2010	5	27	2010-05-27	0.53125	GC	Tofo/Barra	26	0	0	0	0	0	NA
2010	5	28	2010-05-28	0.447917	GC	Tofo/Barra	26	0	0	0	0	0	NA
2010	5	28	2010-05-28	0.447917	GC	Tofo/Barra	25	0	0	0	0	0	NA
2010	5	28	2010-05-28	0.510417	GC	Tofo/Barra	24	0	0	0	0	0	NA
2010	5	28	2010-05-28	0.520833	GC	Tofo/Barra	24	0	0	0	0	0	NA
2010	5	29	2010-05-29	0.395833	GC	Tofo/Barra	26	0	0	0	0	0	NA
2010	5	31	2010-05-31	0.3	MR	Tofo/Barra	24	0	0	0	0	0	NA
2010	6	1	2010-06-01	0.385417	GC	Tofo/Barra	25	0	0	0	0	0	NA
2010	6	2	2010-06-02	0.385417	MR	Tofo/Barra	24	0	0	0	0	0	NA
2010	6	4	2010-06-04	0.552083	RS	Zavora	25	0	0	0	0	0	NA
2010	6	4	2010-06-04	0.479167	WS	Zavora	26	0	0	0	0	0	NA
2010	6	5	2010-06-05	0.40625	RS	Zavora	24	0	0	0	0	0	NA
2010	6	5	2010-06-05	0.322917	WS	Zavora	25	0	0	0	0	0	NA
2010	6	6	2010-06-06	0.385417	GC	Tofo/Barra	25	0	0	0	0	0	NA
2010	6	8	2010-06-08	0.489583	GC	Tofo/Barra	24	0	0	0	0	0	NA
2010	6	8	2010-06-08	0.385417	MR	Tofo/Barra	23	0	0	0	0	0	NA
2010	6	10	2010-06-10	0.4375	MR	Tofo/Barra	23	0	0	0	0	0	NA
2010	6	12	2010-06-12	0.395833	MR	Tofo/Barra	23	0	0	0	0	0	NA
2010	6	13	2010-06-13	0.385417	Of	Tofo/Barra	22	0	0	0	0	0	NA
2010	6	14	2010-06-14	0.5	GC	Tofo/Barra	23	0	0	0	0	0	NA
2010	6	14	2010-06-14	0.40625	MR	Tofo/Barra	23	0	0	0	0	0	NA
2010	6	15	2010-06-15	0.364583	GC	Tofo/Barra	20	0	0	0	0	0	NA
2010	6	16	2010-06-16	0.364583	SF	Tofo/Barra	22	0	0	0	0	0	NA
2010	6	17	2010-06-17	0.385417	TT	Tofo/Barra	22	0	0	0	0	0	NA
2010	6	19	2010-06-19	0.614583	RS	Zavora	23	0	0	0	0	0	NA
2010	6	20	2010-06-20	0.541667	RS	Zavora	24	0	0	0	0	0	NA
2010	6	20	2010-06-20	0.447917	WS	Zavora	23	0	0	0	0	0	NA
2010	6	22	2010-06-22	0.364583	GC	Tofo/Barra	24	1	1	0	1	0	Yes	20100622_GC_Dm_F_RightID_
2010	6	23	2010-06-23	0.322917	GC	Tofo/Barra	24	1	1	0	0	1	Yes	20100623_GC_Dm_U_DorsalID_IMG_6113
2010	6	23	2010-06-23	0.401389	GC	Tofo/Barra	24	0	0	0	0	0	NA
2010	6	24	2010-06-24	0.364583	MR	Tofo/Barra	24	0	0	0	0	0	NA
2010	6	24	2010-06-24	0.364583	SF	Tofo/Barra	24	0	0	0	0	0	NA
2010	6	25	2010-06-25	0.363889	MR	Tofo/Barra	24	0	0	0	0	0	NA
2010	6	26	2010-06-26	0.416667	Of	Tofo/Barra	24	0	0	0	0	0	NA
2010	6	28	2010-06-28	0.375	GC	Tofo/Barra	24	0	0	0	0	0	NA
2010	6	30	2010-06-30	0.395833	MR	Tofo/Barra	23	0	0	0	0	0	NA
2010	7	1	2010-07-01	0.322917	GC	Tofo/Barra	24	0	0	0	0	0	NA
2010	7	1	2010-07-01	0.40625	GC	Tofo/Barra	24	0	0	0	0	0	NA
2010	7	6	2010-07-06	0.40625	MR	Tofo/Barra	24	0	0	0	0	0	NA
2010	7	9	2010-07-09	0.375	GC	Tofo/Barra	24	0	0	0	0	0	NA
2010	7	12	2010-07-12	0.5	GC	Tofo/Barra	24	0	0	0	0	0	NA
2010	7	12	2010-07-12	0.395833	Of	Tofo/Barra	22	0	0	0	0	0	NA
2010	7	28	2010-07-28	0.333333	GC	Tofo/Barra	20	1	1	1	0	0	Yes	MISSING
2010	7	29	2010-07-29	0.333333	GC	Tofo/Barra	20	1	1	0	1	0	Yes	20100729_GC_Dm_F_DorsalID_IMG_7504, 20100729_GC_Dm_F_LeftID_IMG_7503 and 20100729_GC_Dm_U_DorsalID_IMG_7501
2010	8	6	2010-08-06	0.40625	AM	Tofo/Barra	23	0	0	0	0	0	NA
2010	8	6	2010-08-06	0.510417	OF	Tofo/Barra	23	0	0	0	0	0	NA
2010	8	13	2010-08-13	0.40625	GC	Tofo/Barra	23	0	0	0	0	0	NA
2010	8	14	2010-08-14	0.447917	MR	Tofo/Barra	23	0	0	0	0	0	NA
2010	8	24	2010-08-24	0.392361	OF	Tofo/Barra	23	0	0	0	0	0	NA
2010	10	5	2010-10-05	0.447917	GC	Tofo/Barra	24	0	0	0	0	0	NA
2010	10	6	2010-10-06	0.416667	GC	Tofo/Barra	24	0	0	0	0	0	NA
2010	10	6	2010-10-06	0.5	GC	Tofo/Barra	22	0	0	0	0	0	NA
2010	10	12	2010-10-12	0.4375	MR	Tofo/Barra	24	0	0	0	0	0	NA
2010	10	15	2010-10-15	0.447917	MR	Tofo/Barra	23	0	0	0	0	0	NA
2010	10	15	2010-10-15	0.5625	MR	Tofo/Barra	22	0	0	0	0	0	NA
2010	10	19	2010-10-19	0.416667	GC	Tofo/Barra	23	0	0	0	0	0	NA
2010	10	20	2010-10-20	0.541667	GC	Tofo/Barra	23	0	0	0	0	0	NA
2010	10	20	2010-10-20	0.416667	OF	Tofo/Barra	23	0	0	0	0	0	NA
2010	10	21	2010-10-21	0.40625	MR	Tofo/Barra	23	0	0	0	0	0	NA
2010	11	7	2010-11-07	0.375	MR	Tofo/Barra	20	0	0	0	0	0	NA
2010	11	8	2010-11-08	0.572917	GC	Tofo/Barra	22	0	0	0	0	0	NA
2010	11	8	2010-11-08	0.40625	MR	Tofo/Barra	21	0	0	0	0	0	NA
2010	11	10	2010-11-10	0.375	MR	Tofo/Barra	23	0	0	0	0	0	NA
2010	11	10	2010-11-10	0.458333	MR	Tofo/Barra	23	0	0	0	0	0	NA
2010	11	11	2010-11-11	0.416667	MR	Tofo/Barra	23	0	0	0	0	0	NA
2010	11	16	2010-11-16	0.4375	MR	Tofo/Barra	23	0	0	0	0	0	NA
2010	11	17	2010-11-17	0.5625	GC	Tofo/Barra	23	0	0	0	0	0	NA
2010	11	17	2010-11-17	0.395833	XTC	Tofo/Barra	23	0	0	0	0	0	NA
2010	11	19	2010-11-19	0.5625	GC	Tofo/Barra	25	0	0	0	0	0	NA
2010	11	19	2010-11-19	0.4375	OF	Tofo/Barra	25	0	0	0	0	0	NA
2010	11	20	2010-11-20	0.395833	MR	Tofo/Barra	25	0	0	0	0	0	NA
2010	11	20	2010-11-20	0.5625	SF	Tofo/Barra	25	0	0	0	0	0	NA
2010	11	24	2010-11-24	0.5625	GC	Tofo/Barra	25	0	0	0	0	0	NA
2010	11	24	2010-11-24	0.375	MR	Tofo/Barra	25	0	0	0	0	0	NA
2010	11	26	2010-11-26	0.572917	GC	Tofo/Barra	26	0	0	0	0	0	NA
2010	11	26	2010-11-26	0.416667	XTC	Tofo/Barra	26	0	0	0	0	0	NA
2010	12	15	2010-12-15	0.416667	GC	Tofo/Barra	25	0	0	0	0	0	NA
2010	12	15	2010-12-15	0.479167	MR	Tofo/Barra	33	0	0	0	0	0	NA
2010	12	16	2010-12-16	0.375	GC	Tofo/Barra	26	0	0	0	0	0	NA
2010	12	21	2010-12-21	0.447917	GC	Tofo/Barra	26	0	0	0	0	0	NA
2010	12	22	2010-12-22	0.385417	GC	Tofo/Barra	26	0	0	0	0	0	NA
2010	12	22	2010-12-22	0.447917	GC	Tofo/Barra	26	0	0	0	0	0	NA
2010	12	24	2010-12-24	0.416667	GC	Tofo/Barra	24	0	0	0	0	0	NA
2010	12	29	2010-12-29	0.4375	GC	Tofo/Barra	27	0	0	0	0	0	NA
2010	12	29	2010-12-29	0.375	MR	Tofo/Barra	26	0	0	0	0	0	NA
2010	12	30	2010-12-30	0.666667	GC	Tofo/Barra	27	0	0	0	0	0	NA
2011	1	2	2011-01-02	0.4375	MR	Tofo/Barra	27	0	0	0	0	0	NA
2011	1	2	2011-01-02	0.53125	MR	Tofo/Barra	26	0	0	0	0	0	NA
2011	1	3	2011-01-03	0.479167	GC	Tofo/Barra	27	0	0	0	0	0	NA
2011	1	3	2011-01-03	0.375	TT	Tofo/Barra	26	0	0	0	0	0	NA
2011	1	4	2011-01-04	0.3125	GC	Tofo/Barra	26	0	0	0	0	0	NA
2011	1	5	2011-01-05	0.375	GC	Tofo/Barra	27	0	0	0	0	0	NA
2011	1	5	2011-01-05	0.333333	MR	Tofo/Barra	27	0	0	0	0	0	NA
2011	1	7	2011-01-07	0.416667	GC	Tofo/Barra	27	0	0	0	0	0	NA
2011	1	7	2011-01-07	0.59375	GC	Tofo/Barra	27	0	0	0	0	0	NA
2011	1	8	2011-01-08	0.510417	SF	Tofo/Barra	26	0	0	0	0	0	NA
2011	1	8	2011-01-08	0.385417	XTC	Tofo/Barra	26	0	0	0	0	0	NA
2011	1	10	2011-01-10	0.520833	GC	Tofo/Barra	28	0	0	0	0	0	NA
2011	1	10	2011-01-10	0.427083	MR	Tofo/Barra	27	0	0	0	0	0	NA
2011	1	13	2011-01-13	0.510417	GC	Tofo/Barra	28	0	0	0	0	0	NA
2011	1	13	2011-01-13	0.385417	MR	Tofo/Barra	29	0	0	0	0	0	NA
2011	1	16	2011-01-16	0.5	GC	Tofo/Barra	27	0	0	0	0	0	NA
2011	1	16	2011-01-16	0.385417	MR	Tofo/Barra	27	0	0	0	0	0	NA
2011	1	18	2011-01-18	0.510417	CO	Tofo/Barra	27	0	0	0	0	0	NA
2011	1	18	2011-01-18	0.40625	XTC	Tofo/Barra	27	0	0	0	0	0	NA
2011	1	19	2011-01-19	0.520833	GC	Tofo/Barra	28	0	0	0	0	0	NA
2011	1	19	2011-01-19	0.395833	MR	Tofo/Barra	27	0	0	0	0	0	NA
2011	1	21	2011-01-21	0.5625	GC	Tofo/Barra	25	0	0	0	0	0	NA
2011	1	21	2011-01-21	0.4375	OF	Tofo/Barra	27	0	0	0	0	0	NA
2011	1	22	2011-01-22	0.46875	PE	Tofo/Barra	24	0	0	0	0	0	NA
2011	1	22	2011-01-22	0.510417	PE	Tofo/Barra	27	0	0	0	0	0	NA
2011	1	24	2011-01-24	0.625	TT	Tofo/Barra	25	0	0	0	0	0	NA
2011	1	24	2011-01-24	0.395833	XTC	Tofo/Barra	25	0	0	0	0	0	NA
2011	1	25	2011-01-25	0.510417	GC	Tofo/Barra	25	0	0	0	0	0	NA
2011	1	25	2011-01-25	0.40625	OF	Tofo/Barra	25	0	0	0	0	0	NA
2011	1	26	2011-01-26	0.541667	GC	Tofo/Barra	27	0	0	0	0	0	NA
2011	1	26	2011-01-26	0.395833	MR	Tofo/Barra	26	1	1	0	0	1	Yes	20110126_MR_Dm_U_LeftID_
2011	1	29	2011-01-29	0.34375	SF	Tofo/Barra	28	0	0	0	0	0	NA
2011	1	30	2011-01-30	0.375	MR	Tofo/Barra	26	0	0	0	0	0	NA
2011	2	1	2011-02-01	0.402778	OF	Tofo/Barra	27	0	0	0	0	0	NA
2011	2	11	2011-02-11	0.354167	OF	Tofo/Barra	28	0	0	0	0	0	NA
2011	2	19	2011-02-19	0.541667	GC	Tofo/Barra	27	0	0	0	0	0	NA
2011	2	20	2011-02-20	0.510417	OF	Tofo/Barra	26	0	0	0	0	0	NA
2011	2	21	2011-02-21	0.510417	OF	Tofo/Barra	27	0	0	0	0	0	NA
2011	2	28	2011-02-28	0.354167	SF	Tofo/Barra	28	0	0	0	0	0	NA
2011	3	1	2011-03-01	0.3125	MR	Tofo/Barra	28	0	0	0	0	0	NA
2011	3	2	2011-03-02	0.479167	MR	Tofo/Barra	27	0	0	0	0	0	NA
2011	3	2	2011-03-02	0.364583	XTC	Tofo/Barra	27	0	0	0	0	0	NA
2011	3	3	2011-03-03	0.458333	GC	Tofo/Barra	27	0	0	0	0	0	NA
2011	3	3	2011-03-03	0.375	OF	Tofo/Barra	28	0	0	0	0	0	NA
2011	3	3	2011-03-03	0.583333	SA	Tofo/Barra	27	0	0	0	0	0	NA
2011	3	4	2011-03-04	0.364583	MR	Tofo/Barra	27	0	0	0	0	0	NA
2011	3	5	2011-03-05	0.354167	GC	Tofo/Barra	27	0	0	0	0	0	NA
2011	3	6	2011-03-06	0.354167	MA	Tofo/Barra	27	0	0	0	0	0	NA
2011	3	8	2011-03-08	0.479167	MR	Tofo/Barra	26	0	0	0	0	0	NA
2011	3	8	2011-03-08	0.333333	XTC	Tofo/Barra	26	0	0	0	0	0	NA
2011	3	9	2011-03-09	0.416667	AM	Tofo/Barra	26	0	0	0	0	0	NA
2011	3	9	2011-03-09	0.614583	MC	Tofo/Barra	27	0	0	0	0	0	NA
2011	3	9	2011-03-09	0.5	OF	Tofo/Barra	26	0	0	0	0	0	NA
2011	3	12	2011-03-12	0.354167	GC	Tofo/Barra	27	1	2	0	0	2	Yes	20110312_GC_Dm_U_DorsalID_
2011	3	14	2011-03-14	0.364583	GC	Tofo/Barra	26	0	0	0	0	0	NA
2011	3	14	2011-03-14	0.458333	MR	Tofo/Barra	26	0	0	0	0	0	NA
2011	3	14	2011-03-14	0.604167	SA	Tofo/Barra	27	0	0	0	0	0	NA
2011	3	15	2011-03-15	0.385417	CO	Tofo/Barra	26	0	0	0	0	0	NA
2011	3	15	2011-03-15	0.489583	OF	Tofo/Barra	26	0	0	0	0	0	NA
2011	3	16	2011-03-16	0.489583	GC	Tofo/Barra	27	0	0	0	0	0	NA
2011	3	16	2011-03-16	0.395833	XTC	Tofo/Barra	25	0	0	0	0	0	NA
2011	3	17	2011-03-17	0.479167	AMP	Tofo/Barra	28	0	0	0	0	0	NA
2011	3	17	2011-03-17	0.395833	MR	Tofo/Barra	28	0	0	0	0	0	NA
2011	3	19	2011-03-19	0.375	SA	Tofo/Barra	28	0	0	0	0	0	NA
2011	3	20	2011-03-20	0.625	MA	Tofo/Barra	28	0	0	0	0	0	NA
2011	3	23	2011-03-23	0.479167	MR	Tofo/Barra	24	1	1	0	0	1	No
2011	3	23	2011-03-23	0.395833	XTC	Tofo/Barra	24	0	0	0	0	0	NA
2011	3	24	2011-03-24	0.479167	CO	Tofo/Barra	19	0	0	0	0	0	NA
2011	3	24	2011-03-24	0.385417	OF	Tofo/Barra	26	0	0	0	0	0	NA
2011	3	25	2011-03-25	0.479167	AMP	Tofo/Barra	19	0	0	0	0	0	NA
2011	3	25	2011-03-25	0.354167	GC	Tofo/Barra	19	0	0	0	0	0	NA
2011	3	26	2011-03-26	0.604167	KHA	Tofo/Barra	20	0	0	0	0	0	NA
2011	3	26	2011-03-26	0.375	MR	Tofo/Barra	24	0	0	0	0	0	NA
2011	3	26	2011-03-26	0.479167	ST	Tofo/Barra	21	0	0	0	0	0	NA
2011	3	28	2011-03-28	0.489583	GC	Tofo/Barra	23	0	0	0	0	0	NA
2011	3	28	2011-03-28	0.375	SA	Tofo/Barra	26	0	0	0	0	0	NA
2011	3	29	2011-03-29	0.385417	OF	Tofo/Barra	26	0	0	0	0	0	NA
2011	3	29	2011-03-29	0.479167	SF	Tofo/Barra	27	0	0	0	0	0	NA
2011	3	30	2011-03-30	0.604167	MC	Tofo/Barra	26	0	0	0	0	0	NA
2011	3	30	2011-03-30	0.364583	MR	Tofo/Barra	27	0	0	0	0	0	NA
2011	3	31	2011-03-31	0.625	MR	Tofo/Barra	25	0	0	0	0	0	NA
2011	3	31	2011-03-31	0.364583	OF	Tofo/Barra	27	0	0	0	0	0	NA
2011	4	2	2011-04-02	0.354167	GC	Tofo/Barra	25	0	0	0	0	0	NA
2011	4	2	2011-04-02	0.59375	ST	Tofo/Barra	26	0	0	0	0	0	NA
2011	4	3	2011-04-03	0.354167	GC	Tofo/Barra	25	0	0	0	0	0	NA
2011	4	3	2011-04-03	0.604167	SA	Tofo/Barra	25	0	0	0	0	0	NA
2011	4	4	2011-04-04	0.364583	GC	Tofo/Barra	25	0	0	0	0	0	NA
2011	4	6	2011-04-06	0.385417	GC	Tofo/Barra	27	0	0	0	0	0	NA
2011	4	6	2011-04-06	0.489583	GC	Tofo/Barra	26	0	0	0	0	0	NA
2011	4	7	2011-04-07	0.489583	MR	Tofo/Barra	27	0	0	0	0	0	NA
2011	4	7	2011-04-07	0.395833	XTC	Tofo/Barra	26	0	0	0	0	0	NA
2011	4	9	2011-04-09	0.625	KHA	Tofo/Barra	27	0	0	0	0	0	NA
2011	4	11	2011-04-11	0.364583	SA	Tofo/Barra	27	0	0	0	0	0	NA
2011	4	12	2011-04-12	0.395833	MC	Tofo/Barra	26	0	0	0	0	0	NA
2011	4	13	2011-04-13	0.364583	GC	Tofo/Barra	27	0	0	0	0	0	NA
2011	4	13	2011-04-13	0.489583	MR	Tofo/Barra	27	0	0	0	0	0	NA
2011	4	14	2011-04-14	0.395833	GC	Tofo/Barra	22	0	0	0	0	0	NA
2011	4	14	2011-04-14	0.479167	SF	Tofo/Barra	22	0	0	0	0	0	NA
2011	4	16	2011-04-16	0.375	GC	Tofo/Barra	24	0	0	0	0	0	NA
2011	4	16	2011-04-16	0.458333	MR	Tofo/Barra	26	0	0	0	0	0	NA
2011	4	17	2011-04-17	0.46875	GC	Tofo/Barra	24	0	0	0	0	0	NA
2011	4	17	2011-04-17	0.385417	TT	Tofo/Barra	24	0	0	0	0	0	NA
2011	4	18	2011-04-18	0.354167	GC	Tofo/Barra	24	0	0	0	0	0	NA
2011	4	19	2011-04-19	0.354167	GC	Tofo/Barra	25	0	0	0	0	0	NA
2011	4	20	2011-04-20	0.5	GC	Tofo/Barra	26	0	0	0	0	0	NA
2011	4	20	2011-04-20	0.427083	RB	Tofo/Barra	26	0	0	0	0	0	NA
2011	4	21	2011-04-21	0.458333	OF	Tofo/Barra	26	0	0	0	0	0	NA
2011	4	21	2011-04-21	0.552083	OF	Tofo/Barra	26	0	0	0	0	0	NA
2011	4	22	2011-04-22	0.354167	GC	Tofo/Barra	25	0	0	0	0	0	NA
2011	4	23	2011-04-23	0.375	MR	Tofo/Barra	25	0	0	0	0	0	NA
2011	4	23	2011-04-23	0.489583	SF	Tofo/Barra	26	0	0	0	0	0	NA
2011	4	25	2011-04-25	0.625	GC	Tofo/Barra	19	0	0	0	0	0	NA
2011	4	25	2011-04-25	0.395833	MR	Tofo/Barra	20	0	0	0	0	0	NA
2011	4	25	2011-04-25	0.427083	MR	Tofo/Barra	21	0	0	0	0	0	NA
2011	4	25	2011-04-25	0.333333	ST	Tofo/Barra	24	0	0	0	0	0	NA
2011	4	26	2011-04-26	0.375	MR	Tofo/Barra	21	0	0	0	0	0	NA
2011	4	26	2011-04-26	0.4375	OF	Tofo/Barra	23	0	0	0	0	0	NA
2011	4	27	2011-04-27	0.447917	GC	Tofo/Barra	20	0	0	0	0	0	NA
2011	4	27	2011-04-27	0.5625	GC	Tofo/Barra	20	0	0	0	0	0	NA
2011	4	28	2011-04-28	0.4375	GC	Tofo/Barra	19	0	0	0	0	0	NA
2011	4	28	2011-04-28	0.322917	MR	Tofo/Barra	19	0	0	0	0	0	NA
2011	4	28	2011-04-28	0.375	MR	Tofo/Barra	20	0	0	0	0	0	NA
2011	5	1	2011-05-01	0.375	AMP	Tofo/Barra	24	0	0	0	0	0	NA
2011	5	1	2011-05-01	0.479167	MR	Tofo/Barra	24	0	0	0	0	0	NA
2011	5	2	2011-05-02	0.5	GC	Tofo/Barra	25	0	0	0	0	0	NA
2011	5	2	2011-05-02	0.395833	MR	Tofo/Barra	25	0	0	0	0	0	NA
2011	5	3	2011-05-03	0.479167	MC	Tofo/Barra	24	0	0	0	0	0	NA
2011	5	3	2011-05-03	0.385417	OF	Tofo/Barra	24	0	0	0	0	0	NA
2011	5	4	2011-05-04	0.375	MR	Tofo/Barra	24	0	0	0	0	0	NA
2011	5	5	2011-05-05	0.364583	GC	Tofo/Barra	24	0	0	0	0	0	NA
2011	5	5	2011-05-05	0.541667	GC	Tofo/Barra	25	0	0	0	0	0	NA
2011	5	5	2011-05-05	0.427083	MR	Tofo/Barra	24	0	0	0	0	0	NA
2011	5	6	2011-05-06	0.479167	GC	Tofo/Barra	24	0	0	0	0	0	NA
2011	5	6	2011-05-06	0.552083	GC	Tofo/Barra	24	0	0	0	0	0	NA
2011	5	6	2011-05-06	0.40625	MR	Tofo/Barra	22	0	0	0	0	0	NA
2011	5	6	2011-05-06	0.375	XTC	Tofo/Barra	21	0	0	0	0	0	NA
2011	5	7	2011-05-07	0.479167	GC	Tofo/Barra	23	1	1	0	0	1	Yes	20110507_GC_Dm_U_Giants 7th May 2011
2011	5	7	2011-05-07	0.375	OF	Tofo/Barra	24	0	0	0	0	0	NA
2011	5	10	2011-05-10	0.510417	GC	Tofo/Barra	25	0	0	0	0	0	NA
2011	5	11	2011-05-11	0.46875	GC	Tofo/Barra	25	0	0	0	0	0	NA
2011	5	11	2011-05-11	0.364583	MR	Tofo/Barra	25	0	0	0	0	0	NA
2011	5	12	2011-05-12	0.614583	PE	Tofo/Barra	25	0	0	0	0	0	NA
2011	5	13	2011-05-13	0.46875	MR	Tofo/Barra	25	0	0	0	0	0	NA
2011	5	13	2011-05-13	0.510417	MR	Tofo/Barra	25	0	0	0	0	0	NA
2011	5	13	2011-05-13	0.550694	MR	Tofo/Barra	25	0	0	0	0	0	NA
2011	5	15	2011-05-15	0.479167	GC	Tofo/Barra	23	0	0	0	0	0	NA
2011	5	15	2011-05-15	0.364583	MR	Tofo/Barra	23	0	0	0	0	0	NA
2011	5	15	2011-05-15	0.5	MR	Tofo/Barra	24	0	0	0	0	0	NA
2011	5	16	2011-05-16	0.479167	MC	Tofo/Barra	24	0	0	0	0	0	NA
2011	5	16	2011-05-16	0.385417	Of	Tofo/Barra	24	0	0	0	0	0	NA
2011	5	17	2011-05-17	0.479167	GC	Tofo/Barra	22	0	0	0	0	0	NA
2011	5	17	2011-05-17	0.375	MR	Tofo/Barra	24	0	0	0	0	0	NA
2011	5	18	2011-05-18	0.510417	GC	Tofo/Barra	22	0	0	0	0	0	NA
2011	5	18	2011-05-18	0.395833	MR	Tofo/Barra	23	0	0	0	0	0	NA
2011	5	19	2011-05-19	0.489583	GC	Tofo/Barra	21	0	0	0	0	0	NA
2011	5	19	2011-05-19	0.552083	GC	Tofo/Barra	20	0	0	0	0	0	NA
2011	5	19	2011-05-19	0.416667	Of	Tofo/Barra	21	0	0	0	0	0	NA
2011	5	19	2011-05-19	0.375	XTC	Tofo/Barra	21	0	0	0	0	0	NA
2011	5	21	2011-05-21	0.4375	GC	Tofo/Barra	23	0	0	0	0	0	NA
2011	5	21	2011-05-21	0.458333	GC	Tofo/Barra	23	0	0	0	0	0	NA
2011	5	21	2011-05-21	0.364583	MR	Tofo/Barra	22	0	0	0	0	0	NA
2011	5	21	2011-05-21	0.541667	SF	Tofo/Barra	23	0	0	0	0	0	NA
2011	5	22	2011-05-22	0.385417	Of	Tofo/Barra	23	0	0	0	0	0	NA
2011	5	22	2011-05-22	0.46875	Of	Tofo/Barra	23	0	0	0	0	0	NA
2011	5	22	2011-05-22	0.489583	Of	Tofo/Barra	24	0	0	0	0	0	NA
2011	5	22	2011-05-22	0.572917	Sa	Tofo/Barra	20	0	0	0	0	0	NA
2011	5	22	2011-05-22	0.354167	ST	Tofo/Barra	23	0	0	0	0	0	NA
2011	5	23	2011-05-23	0.479167	GC	Tofo/Barra	23	0	0	0	0	0	NA
2011	5	23	2011-05-23	0.375	MR	Tofo/Barra	23	0	0	0	0	0	NA
2011	5	23	2011-05-23	0.541667	MR	Tofo/Barra	24	0	0	0	0	0	NA
2011	5	23	2011-05-23	0.385417	Of	Tofo/Barra	24	0	0	0	0	0	NA
2011	5	24	2011-05-24	0.5	GC	Tofo/Barra	23	0	0	0	0	0	NA
2011	5	24	2011-05-24	0.354167	MR	Tofo/Barra	24	0	0	0	0	0	NA
2011	6	2	2011-06-02	0.385417	MR	Tofo/Barra	22	0	0	0	0	0	NA
2011	6	3	2011-06-03	0.354167	Of	Tofo/Barra	23	0	0	0	0	0	NA
2011	6	4	2011-06-04	0.46875	MR	Tofo/Barra	22	0	0	0	0	0	NA
2011	6	4	2011-06-04	0.385417	XTC	Tofo/Barra	22	0	0	0	0	0	NA
2011	6	6	2011-06-06	0.46875	Am	Tofo/Barra	22	0	0	0	0	0	NA
2011	6	6	2011-06-06	0.375	Of	Tofo/Barra	22	0	0	0	0	0	NA
2011	6	7	2011-06-07	0.541667	GC	Tofo/Barra	23	0	0	0	0	0	NA
2011	6	7	2011-06-07	0.385417	MR	Tofo/Barra	23	0	0	0	0	0	NA
2011	6	7	2011-06-07	0.5	MR	Tofo/Barra	22	0	0	0	0	0	NA
2011	6	7	2011-06-07	0.427083	OF	Tofo/Barra	23	0	0	0	0	0	NA
2011	6	11	2011-06-11	0.46875	GC	Tofo/Barra	23	0	0	0	0	0	NA
2011	6	11	2011-06-11	0.375	XTC	Tofo/Barra	23	0	0	0	0	0	NA
2011	6	13	2011-06-13	0.395833	MR	Tofo/Barra	24	0	0	0	0	0	NA
2011	6	14	2011-06-14	0.46875	GC	Tofo/Barra	24	0	0	0	0	0	NA
2011	6	14	2011-06-14	0.375	MR	Tofo/Barra	21	0	0	0	0	0	NA
2011	6	14	2011-06-14	0.364583	XTC	Tofo/Barra	23	0	0	0	0	0	NA
2011	6	15	2011-06-15	0.354167	Of	Tofo/Barra	24	0	0	0	0	0	NA
2011	6	16	2011-06-16	0.5	GC	Tofo/Barra	23	0	0	0	0	0	NA
2011	6	16	2011-06-16	0.375	MR	Tofo/Barra	23	0	0	0	0	0	NA
2011	6	17	2011-06-17	0.59375	GC	Tofo/Barra	24	0	0	0	0	0	NA
2011	6	17	2011-06-17	0.375	Of	Tofo/Barra	24	0	0	0	0	0	NA
2011	6	18	2011-06-18	0.34375	GC	Tofo/Barra	24	0	0	0	0	0	NA
2011	6	18	2011-06-18	0.479167	SF	Tofo/Barra	24	0	0	0	0	0	NA
2011	6	20	2011-06-20	0.354167	Of	Tofo/Barra	21	0	0	0	0	0	NA
2011	6	21	2011-06-21	0.34375	MR	Tofo/Barra	23	0	0	0	0	0	NA
2011	6	22	2011-06-22	0.4375	GC	Tofo/Barra	23	0	0	0	0	0	NA
2011	6	22	2011-06-22	0.479167	GC	Tofo/Barra	21	0	0	0	0	0	NA
2011	6	22	2011-06-22	0.520833	OF	Tofo/Barra	22	0	0	0	0	0	NA
2011	6	22	2011-06-22	0.375	XTC	Tofo/Barra	22	0	0	0	0	0	NA
2011	6	23	2011-06-23	0.375	AM	Tofo/Barra	23	0	0	0	0	0	NA
2011	6	27	2011-06-27	0.354167	MR	Tofo/Barra	19	0	0	0	0	0	NA
2011	6	28	2011-06-28	0.34375	GC	Tofo/Barra	21	0	0	0	0	0	NA
2011	6	29	2011-06-29	0.34375	SF	Tofo/Barra	18	0	0	0	0	0	NA
2011	7	5	2011-07-05	0.385417	MR	Tofo/Barra	21	1	1	0	0	1	No
2011	7	10	2011-07-10	0.322917	GC	Tofo/Barra	21	0	0	0	0	0	NA
2011	7	11	2011-07-11	0.322917	GC	Tofo/Barra	21	1	1	0	0	1	No
2011	7	13	2011-07-13	0.333333	GC	Tofo/Barra	21	0	0	0	0	0	NA
2011	7	15	2011-07-15	0.364583	OF	Tofo/Barra	19	0	0	0	0	0	NA
2011	7	19	2011-07-19	0.354167	OF	Tofo/Barra	22	0	0	0	0	0	NA
2011	7	20	2011-07-20	0.40625	XTC	Tofo/Barra	22	0	0	0	0	0	NA
2011	7	26	2011-07-26	0.510417	GC	Tofo/Barra	21	0	0	0	0	0	NA
2011	7	26	2011-07-26	0.385417	OF	Tofo/Barra	22	1	1	0	0	1	No
2011	7	26	2011-07-26	0.354167	XTC	Tofo/Barra	22	0	0	0	0	0	NA
2011	7	27	2011-07-27	0.34375	MR	Tofo/Barra	21	0	0	0	0	0	NA
2011	7	27	2011-07-27	0.46875	MR	Tofo/Barra	22	0	0	0	0	0	NA
2011	7	27	2011-07-27	0.368056	XTC	Tofo/Barra	18	0	0	0	0	0	NA
2011	7	27	2011-07-27	0.4375	XTC	Tofo/Barra	20	0	0	0	0	0	NA
2011	7	28	2011-07-28	0.395833	MR	Tofo/Barra	21	0	0	0	0	0	NA
2011	7	28	2011-07-28	0.458333	MR	Tofo/Barra	21	0	0	0	0	0	NA
2011	7	28	2011-07-28	0.375	XTC	Tofo/Barra	21	1	1	0	0	1	Yes	20110728_XTC_Dm_U_DorsalID and 20110728_XTC_Dm_U_Laser_IMG_7935
2011	8	4	2011-08-04	0.40625	GC	Tofo/Barra	22	0	0	0	0	0	NA
2011	8	4	2011-08-04	0.354167	XTC	Tofo/Barra	22	0	0	0	0	0	NA
2011	8	6	2011-08-06	0.395833	GC	Tofo/Barra	22	0	0	0	0	0	NA
2011	8	6	2011-08-06	0.458333	GC	Tofo/Barra	22	0	0	0	0	0	NA
2011	8	6	2011-08-06	0.354167	MR	Tofo/Barra	22	0	0	0	0	0	NA
2011	8	9	2011-08-09	0.375	XTC	Tofo/Barra	20	0	0	0	0	0	NA
2011	8	10	2011-08-10	0.416667	MR	Tofo/Barra	22	0	0	0	0	0	NA
2011	8	11	2011-08-11	0.447917	GC	Tofo/Barra	23	1	1	0	0	1	Yes	20110811_GC_Dm_F_LeftID_, 20110811_GC_Dm_F_Dorsal_ and 20110811_GC_Dm_F_DorsalID_
2011	8	11	2011-08-11	0.375	MR	Tofo/Barra	23	0	0	0	0	0	NA
2011	8	12	2011-08-12	0.427083	MR	Tofo/Barra	23	0	0	0	0	0	NA
2011	8	12	2011-08-12	0.5	MR	Tofo/Barra	23	0	0	0	0	0	NA
2011	8	15	2011-08-15	0.395833	PE	Tofo/Barra	23	0	0	0	0	0	NA
2011	8	26	2011-08-26	0.5625	GC	Tofo/Barra	23	0	0	0	0	0	NA
2011	8	26	2011-08-26	0.458333	MR	Tofo/Barra	20	0	0	0	0	0	NA
2011	8	26	2011-08-26	0.5	ST	Tofo/Barra	23	0	0	0	0	0	NA
2011	8	26	2011-08-26	0.479167	TO	Tofo/Barra	23	0	0	0	0	0	NA
2011	8	26	2011-08-26	0.416667	XTC	Tofo/Barra	23	0	0	0	0	0	NA
2011	9	7	2011-09-07	0.479167	MR	Tofo/Barra	22	0	0	0	0	0	NA
2011	9	7	2011-09-07	0.375	XTC	Tofo/Barra	22	0	0	0	0	0	NA
2011	9	8	2011-09-08	0.5	GC	Tofo/Barra	21	0	0	0	0	0	NA
2011	9	8	2011-09-08	0.395833	OF	Tofo/Barra	20	0	0	0	0	0	NA
2011	9	9	2011-09-09	0.53125	MC	Tofo/Barra	22	0	0	0	0	0	NA
2011	9	9	2011-09-09	0.375	XTC	Tofo/Barra	22	0	0	0	0	0	NA
2011	9	10	2011-09-10	0.416667	AM	Tofo/Barra	22	0	0	0	0	0	NA
2011	9	10	2011-09-10	0.5	MC	Tofo/Barra	22	0	0	0	0	0	NA
2011	9	30	2011-09-30	0.520833	GC	Tofo/Barra	24	0	0	0	0	0	NA
2011	9	30	2011-09-30	0.416667	OF	Tofo/Barra	24	0	0	0	0	0	NA
2011	9	30	2011-09-30	0.458333	OF	Tofo/Barra	23	0	0	0	0	0	NA
2011	10	11	2011-10-11	0.395833	AM	Tofo/Barra	24	0	0	0	0	0	NA
2011	10	11	2011-10-11	0.479167	OF	Tofo/Barra	22	0	0	0	0	0	NA
2011	10	11	2011-10-11	0.479167	RB	Tofo/Barra	24	0	0	0	0	0	NA
2011	10	11	2011-10-11	0.375	XTC	Tofo/Barra	24	0	0	0	0	0	NA
2011	10	12	2011-10-12	0.375	GC	Tofo/Barra	24	1	1	0	0	1	No
2011	10	12	2011-10-12	0.458333	MR	Tofo/Barra	23	0	0	0	0	0	NA
2011	10	12	2011-10-12	0.46875	MR	Tofo/Barra	23	0	0	0	0	0	NA
2011	10	12	2011-10-12	0.385417	XTC	Tofo/Barra	23	0	0	0	0	0	NA
2011	10	13	2011-10-13	0.385417	CO	Tofo/Barra	24	0	0	0	0	0	NA
2011	10	13	2011-10-13	0.375	GC	Tofo/Barra	24	0	0	0	0	0	NA
2011	10	13	2011-10-13	0.46875	MA	Tofo/Barra	24	0	0	0	0	0	NA
2011	10	13	2011-10-13	0.625	MC	Tofo/Barra	24	0	0	0	0	0	NA
2011	10	13	2011-10-13	0.458333	OF	Tofo/Barra	24	0	0	0	0	0	NA
2011	10	14	2011-10-14	0.395833	AM	Tofo/Barra	23	0	0	0	0	0	NA
2011	10	14	2011-10-14	0.395833	MA	Tofo/Barra	24	0	0	0	0	0	NA
2011	10	14	2011-10-14	0.416667	MA	Tofo/Barra	23	0	0	0	0	0	NA
2011	10	14	2011-10-14	0.479167	SA	Tofo/Barra	23	0	0	0	0	0	NA
2011	10	14	2011-10-14	0.5	SA	Tofo/Barra	23	0	0	0	0	0	NA
2011	10	15	2011-10-15	0.479167	MR	Tofo/Barra	23	0	0	0	0	0	NA
2011	10	15	2011-10-15	0.479167	MR	Tofo/Barra	22	0	0	0	0	0	NA
2011	10	15	2011-10-15	0.385417	RB	Tofo/Barra	23	1	1	0	0	1	Yes	MISSING
2011	10	15	2011-10-15	0.385417	XTC	Tofo/Barra	22	0	0	0	0	0	NA
2011	10	26	2011-10-26	0.354167	GC	Tofo/Barra	21	0	0	0	0	0	NA
2011	10	26	2011-10-26	0.458333	MR	Tofo/Barra	22	0	0	0	0	0	NA
2011	10	27	2011-10-27	0.625	CF	Tofo/Barra	22	0	0	0	0	0	NA
2011	10	27	2011-10-27	0.46875	CO	Tofo/Barra	22	0	0	0	0	0	NA
2011	10	27	2011-10-27	0.375	MR	Tofo/Barra	23	0	0	0	0	0	NA
2011	10	27	2011-10-27	0.385417	OF	Tofo/Barra	22	0	0	0	0	0	NA
2011	10	28	2011-10-28	0.520833	GC	Tofo/Barra	22	0	0	0	0	0	NA
2011	10	28	2011-10-28	0.416667	XTC	Tofo/Barra	19	0	0	0	0	0	NA
2011	10	29	2011-10-29	0.375	AM	Tofo/Barra	22	0	0	0	0	0	NA
2011	10	29	2011-10-29	0.479167	OF	Tofo/Barra	21	0	0	0	0	0	NA
2011	10	30	2011-10-30	0.625	MA	Tofo/Barra	21	0	0	0	0	0	NA
2011	10	31	2011-10-31	0.40625	GC	Tofo/Barra	22	0	0	0	0	0	NA
2011	10	31	2011-10-31	0.479167	MR	Tofo/Barra	23	0	0	0	0	0	NA
2011	11	2	2011-11-02	0.375	MR	Tofo/Barra	24	0	0	0	0	0	NA
2011	11	3	2011-11-03	0.375	GC	Tofo/Barra	23	0	0	0	0	0	NA
2011	11	3	2011-11-03	0.459722	GC	Tofo/Barra	23	0	0	0	0	0	NA
2011	11	3	2011-11-03	0.479167	GC	Tofo/Barra	24	0	0	0	0	0	NA
2011	11	3	2011-11-03	0.375	MR	Tofo/Barra	23	0	0	0	0	0	NA
2011	11	3	2011-11-03	0.386111	XTC	Tofo/Barra	24	0	0	0	0	0	NA
2011	11	4	2011-11-04	0.375	OF	Tofo/Barra	23	0	0	0	0	0	NA
2011	11	5	2011-11-05	0.489583	MA	Tofo/Barra	21	0	0	0	0	0	NA
2011	11	5	2011-11-05	0.385417	MR	Tofo/Barra	21	0	0	0	0	0	NA
2011	11	7	2011-11-07	0.385417	GC	Tofo/Barra	25	0	0	0	0	0	NA
2011	11	8	2011-11-08	0.4375	GC	Tofo/Barra	23	0	0	0	0	0	NA
2011	11	8	2011-11-08	0.458333	GC	Tofo/Barra	24	0	0	0	0	0	NA
2011	11	8	2011-11-08	0.364583	MR	Tofo/Barra	23	0	0	0	0	0	NA
2011	11	9	2011-11-09	0.375	Of	Tofo/Barra	22	0	0	0	0	0	NA
2011	11	10	2011-11-10	0.364583	Of	Tofo/Barra	22	0	0	0	0	0	NA
2011	11	11	2011-11-11	0.46875	GC	Tofo/Barra	22	0	0	0	0	0	NA
2011	11	11	2011-11-11	0.541667	GC	Tofo/Barra	21	0	0	0	0	0	NA
2011	11	11	2011-11-11	0.40625	MR	Tofo/Barra	19	0	0	0	0	0	NA
2011	11	11	2011-11-11	0.458333	Of	Tofo/Barra	21	0	0	0	0	0	NA
2011	11	14	2011-11-14	0.458333	MR	Tofo/Barra	22	0	0	0	0	0	NA
2011	11	16	2011-11-16	0.458333	MR	Tofo/Barra	24	0	0	0	0	0	NA
2011	11	16	2011-11-16	0.65625	TT	Tofo/Barra	22	0	0	0	0	0	NA
2011	11	17	2011-11-17	0.520833	GC	Tofo/Barra	23	0	0	0	0	0	NA
2011	11	17	2011-11-17	0.375	Of	Tofo/Barra	24	0	0	0	0	0	NA
2011	11	17	2011-11-17	0.541667	SF	Tofo/Barra	23	0	0	0	0	0	NA
2011	11	18	2011-11-18	0.3125	GC	Tofo/Barra	22	0	0	0	0	0	NA
2011	11	18	2011-11-18	0.479167	GC	Tofo/Barra	23	0	0	0	0	0	NA
2011	11	18	2011-11-18	0.354167	XTC	Tofo/Barra	23	0	0	0	0	0	NA
2011	11	18	2011-11-18	0.4375	XTC	Tofo/Barra	23	0	0	0	0	0	NA
2011	11	19	2011-11-19	0.416667	GC	Tofo/Barra	23	0	0	0	0	0	NA
2011	11	19	2011-11-19	0.416667	MR	Tofo/Barra	23	0	0	0	0	0	NA
2011	11	19	2011-11-19	0.416667	SF	Tofo/Barra	23	0	0	0	0	0	NA
2011	11	21	2011-11-21	0.34375	GC	Tofo/Barra	25	0	0	0	0	0	NA
2011	11	21	2011-11-21	0.354167	GC	Tofo/Barra	25	0	0	0	0	0	NA
2011	11	22	2011-11-22	0.416667	GC	Tofo/Barra	24	0	0	0	0	0	NA
2011	11	23	2011-11-23	0.375	AM	Tofo/Barra	23	0	0	0	0	0	NA
2011	11	23	2011-11-23	0.395833	MR	Tofo/Barra	20	0	0	0	0	0	NA
2011	11	23	2011-11-23	0.40625	Of	Tofo/Barra	NA	0	0	0	0	0	NA
2011	11	23	2011-11-23	0.46875	Of	Tofo/Barra	NA	0	0	0	0	0	NA
2011	11	24	2011-11-24	0.53125	GC	Tofo/Barra	24	0	0	0	0	0	NA
2011	11	24	2011-11-24	0.458333	MR	Tofo/Barra	22	0	0	0	0	0	NA
2011	11	24	2011-11-24	0.364583	Of	Tofo/Barra	23	0	0	0	0	0	NA
2011	11	25	2011-11-25	0.333333	GC	Tofo/Barra	21	0	0	0	0	0	NA
2011	11	25	2011-11-25	0.510417	GC	Tofo/Barra	21	0	0	0	0	0	NA
2011	11	25	2011-11-25	0.4375	Of	Tofo/Barra	20	0	0	0	0	0	NA
2011	11	26	2011-11-26	0.34375	GC	Tofo/Barra	23	0	0	0	0	0	NA
2011	11	27	2011-11-27	0.375	MR	Tofo/Barra	25	0	0	0	0	0	NA
2011	11	28	2011-11-28	0.385417	XTC	Tofo/Barra	24	1	1	0	0	1	Yes	20111128_XTC_Dm_U_DorsalID_P1000857
2011	11	30	2011-11-30	0.4375	XTC	Tofo/Barra	24	0	0	0	0	0	NA
2011	12	3	2011-12-03	0.614583	Am	Tofo/Barra	26	0	0	0	0	0	NA
2011	12	6	2011-12-06	0.489583	GC	Tofo/Barra	24	0	0	0	0	0	NA
2011	12	6	2011-12-06	0.375	Of	Tofo/Barra	24	0	0	0	0	0	NA
2011	12	9	2011-12-09	0.39375	MR	Tofo/Barra	25	0	0	0	0	0	NA
2011	12	12	2011-12-12	0.369444	MR	Tofo/Barra	25	0	0	0	0	0	NA
2011	12	15	2011-12-15	0.35	GC	Tofo/Barra	24	0	0	0	0	0	NA
2011	12	16	2011-12-16	0.367361	MR	Tofo/Barra	24	0	0	0	0	0	NA
2011	12	17	2011-12-17	0.375	Sa	Tofo/Barra	26	0	0	0	0	0	NA
2011	12	18	2011-12-18	0.371528	GC	Tofo/Barra	26	0	0	0	0	0	NA
2011	12	19	2011-12-19	0.402778	OF	Tofo/Barra	26	0	0	0	0	0	NA
2011	12	20	2011-12-20	0.365278	MR	Tofo/Barra	26	0	0	0	0	0	NA
2011	12	27	2011-12-27	0.343056	GC	Tofo/Barra	27	0	0	0	0	0	NA
2011	12	28	2011-12-28	0.336806	TT	Tofo/Barra	27	0	0	0	0	0	NA
2011	12	29	2011-12-29	0.36875	MR	Tofo/Barra	27	0	0	0	0	0	NA
2011	12	30	2011-12-30	0.345139	GC	Tofo/Barra	27	0	0	0	0	0	NA
2011	12	31	2011-12-31	0.360417	OF	Tofo/Barra	27	0	0	0	0	0	NA
2012	1	3	2012-01-03	0.473611	GC	Tofo/Barra	28	0	0	0	0	0	NA
2012	1	3	2012-01-03	0.375	MR	Tofo/Barra	28	0	0	0	0	0	NA
2012	1	3	2012-01-03	0.3625	OF	Tofo/Barra	27	0	0	0	0	0	NA
2012	1	4	2012-01-04	0.382639	OF	Tofo/Barra	27	0	0	0	0	0	NA
2012	1	6	2012-01-06	0.385417	GC	Tofo/Barra	25	0	0	0	0	0	NA
2012	1	7	2012-01-07	0.400694	MR	Tofo/Barra	25	0	0	0	0	0	NA
2012	1	14	2012-01-14	0.508333	PE	Tofo/Barra	23	0	0	0	0	0	NA
2012	1	16	2012-01-16	0.3875	MR	Tofo/Barra	27	0	0	0	0	0	NA
2012	1	18	2012-01-18	0.466667	GC	Tofo/Barra	26	0	0	0	0	0	NA
2012	1	23	2012-01-23	0.591667	GC	Tofo/Barra	26	0	0	0	0	0	NA
2012	1	23	2012-01-23	0.492361	MR	Tofo/Barra	26	0	0	0	0	0	NA
2012	1	30	2012-01-30	0.376389	MR	Tofo/Barra	27	0	0	0	0	0	NA
2012	1	31	2012-01-31	0.35	GC	Tofo/Barra	27	0	0	0	0	0	NA
2012	2	1	2012-02-01	0.405556	MR	Tofo/Barra	27	0	0	0	0	0	NA
2012	2	1	2012-02-01	0.50625	MR	Tofo/Barra	25	0	0	0	0	0	NA
2012	2	2	2012-02-02	0.397917	OF	Tofo/Barra	26	0	0	0	0	0	NA
2012	2	3	2012-02-03	0.495139	GC	Tofo/Barra	27	0	0	0	0	0	NA
2012	2	3	2012-02-03	0.388194	XTC	Tofo/Barra	26	0	0	0	0	0	NA
2012	2	4	2012-02-04	0.405556	MR	Tofo/Barra	26	0	0	0	0	0	NA
2012	2	5	2012-02-05	0.354167	MR	Tofo/Barra	26	0	0	0	0	0	NA
2012	2	5	2012-02-05	NA	XTC	Tofo/Barra	25	0	0	0	0	0	NA
2012	2	7	2012-02-07	0.472222	MR	Tofo/Barra	27	0	0	0	0	0	NA
2012	2	9	2012-02-09	0.58125	GC	Tofo/Barra	27	0	0	0	0	0	NA
2012	2	9	2012-02-09	0.495139	MR	Tofo/Barra	27	0	0	0	0	0	NA
2012	2	9	2012-02-09	0.447222	XTC	Tofo/Barra	26	0	0	0	0	0	NA
2012	2	10	2012-02-10	0.406944	MR	Tofo/Barra	26	0	0	0	0	0	NA
2012	2	10	2012-02-10	0.483333	RB	Tofo/Barra	26	0	0	0	0	0	NA
2012	2	13	2012-02-13	0.493056	GC	Tofo/Barra	24	0	0	0	0	0	NA
2012	2	13	2012-02-13	0.375	MR	Tofo/Barra	25	0	0	0	0	0	NA
2012	2	13	2012-02-13	0.394444	MR	Tofo/Barra	25	0	0	0	0	0	NA
2012	2	14	2012-02-14	0.373611	OF	Tofo/Barra	24	0	0	0	0	0	NA
2012	2	16	2012-02-16	0.3625	SA	Tofo/Barra	26	0	0	0	0	0	NA
2012	2	19	2012-02-19	0.503472	GC	Tofo/Barra	26	0	0	0	0	0	NA
2012	2	19	2012-02-19	0.401389	OF	Tofo/Barra	26	0	0	0	0	0	NA
2012	2	20	2012-02-20	0.373611	MR	Tofo/Barra	27	0	0	0	0	0	NA
2012	2	21	2012-02-21	0.363889	RB	Tofo/Barra	27	0	0	0	0	0	NA
2012	2	23	2012-02-23	0.379861	AM	Tofo/Barra	26	0	0	0	0	0	NA
2012	2	28	2012-02-28	0.377778	GC	Tofo/Barra	25	0	0	0	0	0	NA
2012	2	29	2012-02-29	0.353472	SF	Tofo/Barra	27	0	0	0	0	0	NA
2012	3	8	2012-03-08	0.486806	GC	Tofo/Barra	26	0	0	0	0	0	NA
2012	3	8	2012-03-08	0.377778	MR	Tofo/Barra	26	0	0	0	0	0	NA
2012	3	10	2012-03-10	0.45625	MR	Tofo/Barra	27	0	0	0	0	0	NA
2012	3	10	2012-03-10	0.367361	XTC	Tofo/Barra	27	0	0	0	0	0	NA
2012	3	11	2012-03-11	0.375	OF	Tofo/Barra	26	0	0	0	0	0	NA
2012	3	13	2012-03-13	0.484722	GC	Tofo/Barra	25	0	0	0	0	0	NA
2012	3	13	2012-03-13	0.388194	MR	Tofo/Barra	26	0	0	0	0	0	NA
2012	3	20	2012-03-20	0.427083	RB	Tofo/Barra	27	0	0	0	0	0	NA
2012	3	20	2012-03-20	0.5	RB	Tofo/Barra	27	0	0	0	0	0	NA
2012	3	21	2012-03-21	0.45	RB	Tofo/Barra	26	0	0	0	0	0	NA
2012	3	22	2012-03-22	0.445833	OF	Tofo/Barra	26	0	0	0	0	0	NA
2012	3	22	2012-03-22	0.51875	OF	Tofo/Barra	26	0	0	0	0	0	NA
2012	3	22	2012-03-22	0.377083	RB	Tofo/Barra	26	0	0	0	0	0	NA
2012	3	23	2012-03-23	0.496528	GC	Tofo/Barra	27	0	0	0	0	0	NA
2012	3	23	2012-03-23	0.384028	MR	Tofo/Barra	24	0	0	0	0	0	NA
2012	3	24	2012-03-24	0.380556	OF	Tofo/Barra	24	0	0	0	0	0	NA
2012	3	25	2012-03-25	0.483333	AM	Tofo/Barra	24	0	0	0	0	0	NA
2012	3	25	2012-03-25	0.377083	OF	Tofo/Barra	25	0	0	0	0	0	NA
2012	3	25	2012-03-25	0.383333	OF	Tofo/Barra	24	0	0	0	0	0	NA
2012	3	27	2012-03-27	0.330556	XTC	Tofo/Barra	26	1	1	1	0	0	Yes	MISSING
2012	3	28	2012-03-28	0.456944	AM	Tofo/Barra	26	0	0	0	0	0	NA
2012	3	28	2012-03-28	0.360417	OF	Tofo/Barra	26	0	0	0	0	0	NA
2012	3	29	2012-03-29	0.372917	AM	Tofo/Barra	25	0	0	0	0	0	NA
2012	3	29	2012-03-29	0.331944	MR	Tofo/Barra	24	0	0	0	0	0	NA
2012	3	29	2012-03-29	0.465278	OF	Tofo/Barra	24	0	0	0	0	0	NA
2012	3	30	2012-03-30	0.482639	AM	Tofo/Barra	26	0	0	0	0	0	NA
2012	3	30	2012-03-30	0.380556	OF	Tofo/Barra	26	0	0	0	0	0	NA
2012	3	30	2012-03-30	0.40625	OF	Tofo/Barra	25	0	0	0	0	0	NA
2012	3	31	2012-03-31	0.546528	GC	Tofo/Barra	26	0	0	0	0	0	NA
2012	4	4	2012-04-04	0.479167	GC	Tofo/Barra	27	0	0	0	0	0	NA
2012	4	4	2012-04-04	0.575694	GC	Tofo/Barra	27	0	0	0	0	0	NA
2012	4	4	2012-04-04	0.375	MR	Tofo/Barra	26	0	0	0	0	0	NA
2012	4	4	2012-04-04	0.475694	MR	Tofo/Barra	25	0	0	0	0	0	NA
2012	4	5	2012-04-05	0.381944	MR	Tofo/Barra	27	0	0	0	0	0	NA
2012	4	5	2012-04-05	0.479167	RB	Tofo/Barra	27	0	0	0	0	0	NA
2012	4	7	2012-04-07	0.492361	GC	Tofo/Barra	26	0	0	0	0	0	NA
2012	4	7	2012-04-07	0.553472	SF	Tofo/Barra	26	0	0	0	0	0	NA
2012	4	7	2012-04-07	0.390972	XTC	Tofo/Barra	25	0	0	0	0	0	NA
2012	4	7	2012-04-07	0.450694	XTC	Tofo/Barra	26	0	0	0	0	0	NA
2012	4	8	2012-04-08	0.525	FP	Tofo/Barra	26	0	0	0	0	0	NA
2012	4	8	2012-04-08	0.442361	XTC	Tofo/Barra	26	0	0	0	0	0	NA
2012	4	9	2012-04-09	0.454167	AM	Tofo/Barra	27	0	0	0	0	0	NA
2012	4	9	2012-04-09	0.557639	GC	Tofo/Barra	26	0	0	0	0	0	NA
2012	4	11	2012-04-11	0.520833	FP	Tofo/Barra	26	0	0	0	0	0	NA
2012	4	11	2012-04-11	0.590278	GC	Tofo/Barra	26	0	0	0	0	0	NA
2012	4	11	2012-04-11	0.474306	MR	Tofo/Barra	26	0	0	0	0	0	NA
2012	4	11	2012-04-11	0.4375	XTC	Tofo/Barra	25	0	0	0	0	0	NA
2012	4	14	2012-04-14	0.484028	AM	Tofo/Barra	25	0	0	0	0	0	NA
2012	4	14	2012-04-14	0.383333	OF	Tofo/Barra	25	0	0	0	0	0	NA
2012	4	16	2012-04-16	0.464583	AM	Tofo/Barra	26	0	0	0	0	0	NA
2012	4	16	2012-04-16	0.36875	OF	Tofo/Barra	26	0	0	0	0	0	NA
2012	4	17	2012-04-17	0.368056	MR	Tofo/Barra	24	0	0	0	0	0	NA
2012	4	18	2012-04-18	0.465972	MR	Tofo/Barra	24	0	0	0	0	0	NA
2012	4	18	2012-04-18	0.375694	XTC	Tofo/Barra	25	0	0	0	0	0	NA
2012	4	19	2012-04-19	0.397917	OF	Tofo/Barra	25	0	0	0	0	0	NA
2012	4	20	2012-04-20	0.361111	MR	Tofo/Barra	25	0	0	0	0	0	NA
2012	4	22	2012-04-22	0.363889	MR	Tofo/Barra	25	1	1	0	0	1	No
2012	4	22	2012-04-22	0.465278	XTC	Tofo/Barra	25	0	0	0	0	0	NA
2012	4	23	2012-04-23	0.472917	FP	Tofo/Barra	25	0	0	0	0	0	NA
2012	4	23	2012-04-23	0.427083	MR	Tofo/Barra	25	0	0	0	0	0	NA
2012	4	23	2012-04-23	0.520833	SF	Tofo/Barra	25	0	0	0	0	0	NA
2012	4	23	2012-04-23	0.567361	SF	Tofo/Barra	25	0	0	0	0	0	NA
2012	4	24	2012-04-24	0.369444	OF	Tofo/Barra	25	0	0	0	0	0	NA
2012	4	27	2012-04-27	0.486806	MR	Tofo/Barra	25	0	0	0	0	0	NA
2012	4	27	2012-04-27	0.377778	SF	Tofo/Barra	25	0	0	0	0	0	NA
2012	4	27	2012-04-27	0.376389	XTC	Tofo/Barra	25	1	1	0	0	1	Yes	20120427_XTC_Dm_U_DorsalID_ and 20120427_XTC_Dm_U_DorsalID_Stan
2012	4	28	2012-04-28	0.463889	CO	Tofo/Barra	25	0	0	0	0	0	NA
2012	4	28	2012-04-28	0.365972	OF	Tofo/Barra	25	0	0	0	0	0	NA
2012	4	30	2012-04-30	0.440972	GC	Tofo/Barra	24	0	0	0	0	0	NA
2012	4	30	2012-04-30	0.488194	GC	Tofo/Barra	24	0	0	0	0	0	NA
2012	4	30	2012-04-30	0.354861	MR	Tofo/Barra	24	0	0	0	0	0	NA
2012	4	30	2012-04-30	0.384722	MR	Tofo/Barra	24	0	0	0	0	0	NA
2012	5	1	2012-05-01	0.471528	CO	Tofo/Barra	25	0	0	0	0	0	NA
2012	5	1	2012-05-01	0.373611	OF	Tofo/Barra	24	0	0	0	0	0	NA
2012	5	1	2012-05-01	0.386806	OF	Tofo/Barra	24	0	0	0	0	0	NA
2012	5	2	2012-05-02	0.377083	XTC	Tofo/Barra	22	0	0	0	0	0	NA
2012	5	3	2012-05-03	0.593056	GC	Tofo/Barra	24	0	0	0	0	0	NA
2012	5	3	2012-05-03	0.375	MR	Tofo/Barra	23	0	0	0	0	0	NA
2012	5	4	2012-05-04	0.376389	OF	Tofo/Barra	24	0	0	0	0	0	NA
2012	5	5	2012-05-05	0.552083	GC	Tofo/Barra	25	1	1	1	0	0	Yes	20120505_GC_Dm_U_DorsalID_Laser_CP
2012	5	5	2012-05-05	0.466667	LAP	Tofo/Barra	21	0	0	0	0	0	NA
2012	5	5	2012-05-05	0.430556	OF	Tofo/Barra	25	0	0	0	0	0	NA
2012	5	5	2012-05-05	0.525	SF	Tofo/Barra	22	0	0	0	0	0	NA
2012	5	6	2012-05-06	0.430556	OF	Tofo/Barra	24	0	0	0	0	0	NA
2012	5	6	2012-05-06	0.505556	OF	Tofo/Barra	24	0	0	0	0	0	NA
2012	5	7	2012-05-07	0.372917	OF	Tofo/Barra	24	0	0	0	0	0	NA
2012	5	10	2012-05-10	0.370139	AM	Tofo/Barra	23	0	0	0	0	0	NA
2012	5	10	2012-05-10	0.413194	FP	Tofo/Barra	23	0	0	0	0	0	NA
2012	5	10	2012-05-10	0.509028	GC	Tofo/Barra	25	0	0	0	0	0	NA
2012	5	10	2012-05-10	0.461806	OF	Tofo/Barra	25	0	0	0	0	0	NA
2012	5	11	2012-05-11	0.363194	XTC	Tofo/Barra	23	0	0	0	0	0	NA
2012	5	12	2012-05-12	0.375	MR	Tofo/Barra	24	0	0	0	0	0	NA
2012	5	14	2012-05-14	0.49375	GC	Tofo/Barra	23	0	0	0	0	0	NA
2012	5	14	2012-05-14	0.3875	MR	Tofo/Barra	24	0	0	0	0	0	NA
2012	5	15	2012-05-15	0.622222	GC	Tofo/Barra	24	0	0	0	0	0	NA
2012	5	16	2012-05-16	0.391667	MR	Tofo/Barra	23	0	0	0	0	0	NA
2012	5	16	2012-05-16	0.486111	XTC	Tofo/Barra	23	0	0	0	0	0	NA
2012	5	19	2012-05-19	0.389583	OF	Tofo/Barra	24	0	0	0	0	0	NA
2012	5	19	2012-05-19	0.488889	SA	Tofo/Barra	24	0	0	0	0	0	NA
2012	5	21	2012-05-21	0.386111	MR	Tofo/Barra	23	0	0	0	0	0	NA
2012	5	21	2012-05-21	0.484722	XTC	Tofo/Barra	21	0	0	0	0	0	NA
2012	5	22	2012-05-22	0.470139	GC	Tofo/Barra	24	0	0	0	0	0	NA
2012	5	22	2012-05-22	0.378472	OF	Tofo/Barra	24	0	0	0	0	0	NA
2012	5	23	2012-05-23	0.372222	MR	Tofo/Barra	23	0	0	0	0	0	NA
2012	5	23	2012-05-23	0.474306	RB	Tofo/Barra	24	0	0	0	0	0	NA
2012	5	24	2012-05-24	0.410417	TT	Tofo/Barra	21	0	0	0	0	0	NA
2012	5	25	2012-05-25	0.379167	MR	Tofo/Barra	23	0	0	0	0	0	NA
2012	5	26	2012-05-26	0.486806	AM	Tofo/Barra	23	0	0	0	0	0	NA
2012	5	26	2012-05-26	0.392361	OF	Tofo/Barra	23	0	0	0	0	0	NA
2012	5	30	2012-05-30	0.578472	GC	Tofo/Barra	21	0	0	0	0	0	NA
2012	5	30	2012-05-30	0.386111	SF	Tofo/Barra	23	0	0	0	0	0	NA
2012	5	30	2012-05-30	0.409722	TT	Tofo/Barra	23	0	0	0	0	0	NA
2012	6	6	2012-06-06	0.484722	RB	Tofo/Barra	24	0	0	0	0	0	NA
2012	6	6	2012-06-06	0.391667	XTC	Tofo/Barra	24	0	0	0	0	0	NA
2012	6	7	2012-06-07	0.597222	GC	Tofo/Barra	25	0	0	0	0	0	NA
2012	6	8	2012-06-08	0.376389	SF	Tofo/Barra	25	0	0	0	0	0	NA
2012	6	11	2012-06-11	0.363194	GC	Tofo/Barra	24	0	0	0	0	0	NA
2012	6	12	2012-06-12	0.444444	GC	Tofo/Barra	24	0	0	0	0	0	NA
2012	6	12	2012-06-12	0.507639	TT	Tofo/Barra	24	0	0	0	0	0	NA
2012	6	13	2012-06-13	0.563194	GC	Tofo/Barra	24	0	0	0	0	0	NA
2012	6	13	2012-06-13	0.564583	GC	Tofo/Barra	24	0	0	0	0	0	NA
2012	6	13	2012-06-13	0.430556	MR	Tofo/Barra	24	0	0	0	0	0	NA
2012	6	13	2012-06-13	0.475	XTC	Tofo/Barra	24	0	0	0	0	0	NA
2012	6	14	2012-06-14	0.489583	GC	Tofo/Barra	24	0	0	0	0	0	NA
2012	6	14	2012-06-14	0.395833	OF	Tofo/Barra	24	0	0	0	0	0	NA
2012	6	15	2012-06-15	0.386111	XTC	Tofo/Barra	24	0	0	0	0	0	NA
2012	6	16	2012-06-16	0.458333	GC	Tofo/Barra	24	0	0	0	0	0	NA
2012	6	16	2012-06-16	0.375	MR	Tofo/Barra	24	0	0	0	0	0	NA
2012	6	18	2012-06-18	0.357639	SF	Tofo/Barra	24	0	0	0	0	0	NA
2012	6	19	2012-06-19	0.424306	GC	Tofo/Barra	23	0	0	0	0	0	NA
2012	6	19	2012-06-19	0.458333	SF	Tofo/Barra	23	0	0	0	0	0	NA
2012	6	19	2012-06-19	0.488194	TT	Tofo/Barra	23	0	0	0	0	0	NA
2012	6	20	2012-06-20	0.480556	SF	Tofo/Barra	22	0	0	0	0	0	NA
2012	6	20	2012-06-20	0.4375	TT	Tofo/Barra	22	0	0	0	0	0	NA
2012	6	21	2012-06-21	0.479167	GC	Tofo/Barra	22	0	0	0	0	0	NA
2012	6	21	2012-06-21	0.375	MR	Tofo/Barra	22	0	0	0	0	0	NA
2012	6	21	2012-06-21	0.402778	MR	Tofo/Barra	22	0	0	0	0	0	NA
2012	6	22	2012-06-22	0.520833	GC	Tofo/Barra	21	0	0	0	0	0	NA
2012	6	22	2012-06-22	0.55625	GC	Tofo/Barra	21	0	0	0	0	0	NA
2012	6	22	2012-06-22	0.416667	MR	Tofo/Barra	23	0	0	0	0	0	NA
2012	6	22	2012-06-22	0.453472	MR	Tofo/Barra	21	0	0	0	0	0	NA
2012	6	23	2012-06-23	0.4	OF	Tofo/Barra	20	0	0	0	0	0	NA
2012	6	25	2012-06-25	0.416667	3P	Bazaruto Archipelago/San Sebastian	23	0	0	0	0	0	NA
2012	6	25	2012-06-25	0.513889	GC	Tofo/Barra	20	0	0	0	0	0	NA
2012	6	25	2012-06-25	0.409722	MR	Tofo/Barra	24	0	0	0	0	0	NA
2012	6	26	2012-06-26	0.379167	OF	Tofo/Barra	22	0	0	0	0	0	NA
2012	6	29	2012-06-29	0.314583	XTC	Tofo/Barra	22	0	0	0	0	0	NA
2012	6	30	2012-06-30	0.388889	OF	Tofo/Barra	24	0	0	0	0	0	NA
2012	7	1	2012-07-01	0.385417	OF	Tofo/Barra	23	0	0	0	0	0	NA
2012	7	2	2012-07-02	0.5	GC	Tofo/Barra	22	0	0	0	0	0	NA
2012	7	2	2012-07-02	0.400694	XTC	Tofo/Barra	23	0	0	0	0	0	NA
2012	7	3	2012-07-03	0.442361	GC	Tofo/Barra	22	0	0	0	0	0	NA
2012	7	3	2012-07-03	0.540278	GC	Tofo/Barra	22	0	0	0	0	0	NA
2012	7	3	2012-07-03	0.589583	GC	Tofo/Barra	22	0	0	0	0	0	NA
2012	7	3	2012-07-03	0.3875	MR	Tofo/Barra	22	0	0	0	0	0	NA
2012	7	3	2012-07-03	0.485417	SF	Tofo/Barra	22	0	0	0	0	0	NA
2012	7	4	2012-07-04	0.506944	GC	Tofo/Barra	22	0	0	0	0	0	NA
2012	7	4	2012-07-04	0.409722	OF	Tofo/Barra	22	0	0	0	0	0	NA
2012	7	5	2012-07-05	0.403472	GC	Tofo/Barra	23	0	0	0	0	0	NA
2012	7	5	2012-07-05	0.547917	OF	Tofo/Barra	22	0	0	0	0	0	NA
2012	7	6	2012-07-06	0.463889	GC	Tofo/Barra	22	0	0	0	0	0	NA
2012	7	6	2012-07-06	0.435417	SF	Tofo/Barra	23	0	0	0	0	0	NA
2012	7	7	2012-07-07	0.464583	MR	Tofo/Barra	23	0	0	0	0	0	NA
2012	7	7	2012-07-07	0.506944	MR	Tofo/Barra	22	0	0	0	0	0	NA
2012	7	7	2012-07-07	0.430556	XTC	Tofo/Barra	23	0	0	0	0	0	NA
2012	7	9	2012-07-09	0.373611	GC	Tofo/Barra	22	0	0	0	0	0	NA
2012	7	10	2012-07-10	0.409722	GC	Tofo/Barra	22	0	0	0	0	0	NA
2012	7	11	2012-07-11	0.472222	GC	Tofo/Barra	23	0	0	0	0	0	NA
2012	7	11	2012-07-11	0.375	OF	Tofo/Barra	22	0	0	0	0	0	NA
2012	7	13	2012-07-13	0.458333	MR	Tofo/Barra	20	0	0	0	0	0	NA
2012	7	14	2012-07-14	0.375	GC	Tofo/Barra	21	1	1	0	0	1	No
2012	7	15	2012-07-15	0.373611	GC	Tofo/Barra	22	1	1	0	0	1	Yes	20120715_GC_Dm_U_DorsalID_LB
2012	7	16	2012-07-16	0.479167	GC	Tofo/Barra	22	0	0	0	0	0	NA
2012	7	16	2012-07-16	0.381944	MR	Tofo/Barra	21	0	0	0	0	0	NA
2012	7	21	2012-07-21	0.483333	GC	Tofo/Barra	22	0	0	0	0	0	NA
2012	7	21	2012-07-21	0.529167	GC	Tofo/Barra	22	0	0	0	0	0	NA
2012	7	21	2012-07-21	0.372917	MR	Tofo/Barra	22	1	1	0	0	1	No
2012	7	21	2012-07-21	0.425694	MR	Tofo/Barra	22	0	0	0	0	0	NA
2012	7	23	2012-07-23	0.491667	GC	Tofo/Barra	23	1	1	0	0	1	Yes	20120723_GC_Dm_U_DorsalID_
2012	7	23	2012-07-23	0.390278	MR	Tofo/Barra	23	0	0	0	0	0	NA
2012	7	24	2012-07-24	0.389583	GC	Tofo/Barra	23	0	0	0	0	0	NA
2012	7	25	2012-07-25	0.397917	OF	Tofo/Barra	23	0	0	0	0	0	NA
2012	7	26	2012-07-26	0.373611	GC	Tofo/Barra	23	0	0	0	0	0	NA
2012	7	30	2012-07-30	0.388889	GC	Tofo/Barra	23	0	0	0	0	0	NA
2012	7	30	2012-07-30	0.490278	MR	Tofo/Barra	23	0	0	0	0	0	NA
2012	7	31	2012-07-31	0.495833	GC	Tofo/Barra	23	0	0	0	0	0	NA
2012	7	31	2012-07-31	0.386806	OF	Tofo/Barra	23	0	0	0	0	0	NA
2012	8	3	2012-08-03	0.386806	XTC	Tofo/Barra	23	0	0	0	0	0	NA
2012	8	10	2012-08-10	0.33125	MR	Tofo/Barra	22	1	1	0	0	1	No
2012	8	14	2012-08-14	0.399306	MR	Tofo/Barra	22	0	0	0	0	0	NA
2012	8	16	2012-08-16	0.402778	MR	Tofo/Barra	22	0	0	0	0	0	NA
2012	8	20	2012-08-20	0.393056	MR	Tofo/Barra	22	0	0	0	0	0	NA
2012	8	21	2012-08-21	0.486806	GC	Tofo/Barra	21	0	0	0	0	0	NA
2012	8	21	2012-08-21	0.3875	XTC	Tofo/Barra	22	0	0	0	0	0	NA
2012	8	22	2012-08-22	0.397222	MR	Tofo/Barra	21	0	0	0	0	0	NA
2012	8	22	2012-08-22	0.499306	RB	Tofo/Barra	21	1	1	0	1	0	Yes	20120822_RB_Dm_F_DorsalID_HD_IMG_1221
2012	8	25	2012-08-25	0.369444	GC	Tofo/Barra	22	1	1	0	0	1	No
2012	8	28	2012-08-28	0.380556	GC	Tofo/Barra	20	0	0	0	0	0	NA
2012	8	29	2012-08-29	0.397917	MR	Tofo/Barra	22	0	0	0	0	0	NA
2012	8	30	2012-08-30	0.402083	OF	Tofo/Barra	22	0	0	0	0	0	NA
2012	8	31	2012-08-31	0.382639	MR	Tofo/Barra	22	0	0	0	0	0	NA
2012	9	1	2012-09-01	0.5	GC	Tofo/Barra	20	0	0	0	0	0	NA
2012	9	1	2012-09-01	0.402778	OF	Tofo/Barra	20	0	0	0	0	0	NA
2012	9	4	2012-09-04	0.406944	MR	Tofo/Barra	20	0	0	0	0	0	NA
2012	9	5	2012-09-05	0.382639	GC	Tofo/Barra	21	0	0	0	0	0	NA
2012	9	11	2012-09-11	0.413194	MR	Tofo/Barra	23	0	0	0	0	0	NA
2012	9	12	2012-09-12	0.402778	OF	Tofo/Barra	23	0	0	0	0	0	NA
2012	9	13	2012-09-13	0.372917	MR	Tofo/Barra	23	0	0	0	0	0	NA
2012	9	13	2012-09-13	0.406944	MR	Tofo/Barra	22	0	0	0	0	0	NA
2012	9	14	2012-09-14	0.395833	GC	Tofo/Barra	23	0	0	0	0	0	NA
2012	9	18	2012-09-18	0.4125	AM	Tofo/Barra	24	0	0	0	0	0	NA
2012	9	18	2012-09-18	0.51875	OF	Tofo/Barra	24	0	0	0	0	0	NA
2012	9	19	2012-09-19	0.390278	MR	Tofo/Barra	24	0	0	0	0	0	NA
2012	9	19	2012-09-19	0.484722	XTC	Tofo/Barra	24	0	0	0	0	0	NA
2012	9	20	2012-09-20	0.365278	GC	Tofo/Barra	24	0	0	0	0	0	NA
2012	9	21	2012-09-21	0.372222	GC	Tofo/Barra	24	0	0	0	0	0	NA
2012	9	21	2012-09-21	0.529861	SF	Tofo/Barra	24	0	0	0	0	0	NA
2012	9	22	2012-09-22	0.377778	MR	Tofo/Barra	23	0	0	0	0	0	NA
2012	9	22	2012-09-22	0.485417	RB	Tofo/Barra	22	0	0	0	0	0	NA
2012	9	24	2012-09-24	0.499306	GC	Tofo/Barra	19	0	0	0	0	0	NA
2012	9	24	2012-09-24	0.385417	MR	Tofo/Barra	20	0	0	0	0	0	NA
2012	9	25	2012-09-25	0.377083	GC	Tofo/Barra	23	0	0	0	0	0	NA
2012	9	26	2012-09-26	0.516667	GC	Tofo/Barra	19	0	0	0	0	0	NA
2012	9	26	2012-09-26	0.371528	MR	Tofo/Barra	20	0	0	0	0	0	NA
2012	9	26	2012-09-26	0.401389	MR	Tofo/Barra	23	0	0	0	0	0	NA
2012	9	27	2012-09-27	0.417361	AM	Tofo/Barra	22	0	0	0	0	0	NA
2012	9	27	2012-09-27	0.398611	OF	Tofo/Barra	22	0	0	0	0	0	NA
2012	9	27	2012-09-27	0.515972	OF	Tofo/Barra	20	0	0	0	0	0	NA
2012	9	28	2012-09-28	0.381944	XTC	Tofo/Barra	21	0	0	0	0	0	NA
2012	9	29	2012-09-29	0.376389	GC	Tofo/Barra	23	0	0	0	0	0	NA
2012	10	1	2012-10-01	0.395833	XTC	Tofo/Barra	12	0	0	0	0	0	NA
2012	10	2	2012-10-02	0.370833	GC	Tofo/Barra	22	0	0	0	0	0	NA
2012	10	4	2012-10-04	0.409722	GC	Tofo/Barra	21	0	0	0	0	0	NA
2012	10	5	2012-10-05	0.504167	AM	Tofo/Barra	21	0	0	0	0	0	NA
2012	10	5	2012-10-05	0.40625	OF	Tofo/Barra	22	0	0	0	0	0	NA
2012	10	6	2012-10-06	0.386111	MR	Tofo/Barra	22	0	0	0	0	0	NA
2012	10	8	2012-10-08	0.379861	FP	Tofo/Barra	22	0	0	0	0	0	NA
2012	10	8	2012-10-08	0.4875	GC	Tofo/Barra	21	0	0	0	0	0	NA
2012	10	10	2012-10-10	0.404167	OF	Tofo/Barra	23	0	0	0	0	0	NA
2012	10	11	2012-10-11	NA	MR	Tofo/Barra	22	0	0	0	0	0	NA
2012	10	12	2012-10-12	0.361806	GC	Tofo/Barra	21	0	0	0	0	0	NA
2012	10	13	2012-10-13	0.368056	GC	Tofo/Barra	22	0	0	0	0	0	NA
2012	10	15	2012-10-15	0.395833	XTC	Tofo/Barra	21	0	0	0	0	0	NA
2012	10	16	2012-10-16	0.3875	OF	Tofo/Barra	21	0	0	0	0	0	NA
2012	10	17	2012-10-17	0.369444	GC	Tofo/Barra	22	0	0	0	0	0	NA
2012	10	18	2012-10-18	0.496528	AM	Tofo/Barra	20	0	0	0	0	0	NA
2012	10	18	2012-10-18	0.399306	OF	Tofo/Barra	20	0	0	0	0	0	NA
2012	10	19	2012-10-19	0.364583	GC	Tofo/Barra	22	0	0	0	0	0	NA
2012	10	20	2012-10-20	0.409722	CO	Tofo/Barra	22	0	0	0	0	0	NA
2012	10	20	2012-10-20	0.510417	SF	Tofo/Barra	21	0	0	0	0	0	NA
2012	10	20	2012-10-20	0.392361	XTC	Tofo/Barra	22	0	0	0	0	0	NA
2012	10	21	2012-10-21	0.509028	GC	Tofo/Barra	22	0	0	0	0	0	NA
2012	10	21	2012-10-21	0.384028	MR	Tofo/Barra	22	0	0	0	0	0	NA
2012	10	22	2012-10-22	0.4875	MR	Tofo/Barra	24	0	0	0	0	0	NA
2012	10	22	2012-10-22	0.3875	XTC	Tofo/Barra	24	0	0	0	0	0	NA
2012	10	24	2012-10-24	0.365278	GC	Tofo/Barra	24	1	1	0	0	1	Yes	20121024_GC_Dm_U_DorsalID_LB and 20121024_GC_Dm_U_DorsalID2_LB
2012	10	24	2012-10-24	0.402778	MR	Tofo/Barra	22	0	0	0	0	0	NA
2012	10	25	2012-10-25	0.500694	GC	Tofo/Barra	24	0	0	0	0	0	NA
2012	10	25	2012-10-25	0.395833	MR	Tofo/Barra	22	0	0	0	0	0	NA
2012	10	25	2012-10-25	0.400694	MR	Tofo/Barra	22	0	0	0	0	0	NA
2012	10	26	2012-10-26	0.381944	OF	Tofo/Barra	24	0	0	0	0	0	NA
2012	10	26	2012-10-26	0.392361	TT	Tofo/Barra	24	1	1	1	0	0	Yes	20121026_TT_Dm_M_LeftID_JW_IMG_4748
2012	10	26	2012-10-26	0.480556	TT	Tofo/Barra	21	0	0	0	0	0	NA
2012	10	27	2012-10-27	0.365972	GC	Tofo/Barra	24	1	1	0	0	1	No
2012	10	29	2012-10-29	0.393056	MR	Tofo/Barra	24	0	0	0	0	0	NA
2012	10	29	2012-10-29	0.488194	XTC	Tofo/Barra	22	0	0	0	0	0	NA
2012	10	30	2012-10-30	0.5	CO	Tofo/Barra	23	1	1	1	0	0	Yes	20121030_CO_Dm_M_DorsalID_SJP and 20121030_CO_Dm_M_DorsalID2_SJP
2012	10	30	2012-10-30	0.354167	GC	Tofo/Barra	23	1	1	1	0	0	Yes	20121030_GC_Dm_U_DorsalID
2012	10	30	2012-10-30	0.409722	OF	Tofo/Barra	23	0	0	0	0	0	NA
2012	10	31	2012-10-31	0.375	TT	Tofo/Barra	23	0	0	0	0	0	NA
2012	11	1	2012-11-01	0.375	MR	Tofo/Barra	22	0	0	0	0	0	NA
2012	11	6	2012-11-06	0.5	GC	Tofo/Barra	22	0	0	0	0	0	NA
2012	11	6	2012-11-06	0.409722	OF	Tofo/Barra	22	0	0	0	0	0	NA
2012	11	7	2012-11-07	0.473611	MR	Tofo/Barra	21	0	0	0	0	0	NA
2012	11	7	2012-11-07	0.394444	XTC	Tofo/Barra	21	0	0	0	0	0	NA
2012	11	14	2012-11-14	0.488194	GC	Tofo/Barra	24	0	0	0	0	0	NA
2012	11	14	2012-11-14	0.425	MR	Tofo/Barra	21	0	0	0	0	0	NA
2012	11	15	2012-11-15	0.38125	GC	Tofo/Barra	24	1	1	0	0	1	Yes	20121115_GC_Dm_U_DorsalID_LW
2012	11	15	2012-11-15	0.425694	GC	Tofo/Barra	23	0	0	0	0	0	NA
2012	11	16	2012-11-16	0.435417	AM	Tofo/Barra	24	0	0	0	0	0	NA
2012	11	17	2012-11-17	0.355556	GC	Tofo/Barra	24	0	0	0	0	0	NA
2012	11	17	2012-11-17	0.463194	SF	Tofo/Barra	23	0	0	0	0	0	NA
2012	11	19	2012-11-19	0.357639	GC	Tofo/Barra	26	0	0	0	0	0	NA
2012	11	21	2012-11-21	0.40625	OF	Tofo/Barra	26	0	0	0	0	0	NA
2012	11	22	2012-11-22	0.388194	AM	Tofo/Barra	26	0	0	0	0	0	NA
2012	11	22	2012-11-22	0.477778	CO	Tofo/Barra	22	0	0	0	0	0	NA
2012	11	23	2012-11-23	0.386111	AM	Tofo/Barra	27	0	0	0	0	0	NA
2012	11	23	2012-11-23	0.476389	OF	Tofo/Barra	26	0	0	0	0	0	NA
2012	11	24	2012-11-24	0.361111	GC	Tofo/Barra	25	0	0	0	0	0	NA
2012	11	25	2012-11-25	0.35	GC	Tofo/Barra	25	0	0	0	0	0	NA
2012	11	26	2012-11-26	0.541667	GC	Tofo/Barra	26	0	0	0	0	0	NA
2012	11	27	2012-11-27	0.429167	GC	Tofo/Barra	25	0	0	0	0	0	NA
2012	11	27	2012-11-27	0.479167	GC	Tofo/Barra	27	0	0	0	0	0	NA
2012	11	27	2012-11-27	0.573611	SF	Tofo/Barra	26	0	0	0	0	0	NA
2012	11	27	2012-11-27	0.375	TT	Tofo/Barra	26	0	0	0	0	0	NA
2012	11	28	2012-11-28	0.484028	GC	Tofo/Barra	27	0	0	0	0	0	NA
2012	11	28	2012-11-28	0.555556	GC	Tofo/Barra	26	0	0	0	0	0	NA
2012	11	28	2012-11-28	0.456944	MR	Tofo/Barra	26	0	0	0	0	0	NA
2012	11	28	2012-11-28	0.377778	TT	Tofo/Barra	26	0	0	0	0	0	NA
2012	11	29	2012-11-29	0.551389	GC	Tofo/Barra	26	0	0	0	0	0	NA
2012	11	29	2012-11-29	0.484722	MR	Tofo/Barra	26	0	0	0	0	0	NA
2012	11	29	2012-11-29	0.4375	Of	Tofo/Barra	26	0	0	0	0	0	NA
2012	11	29	2012-11-29	0.377083	XTC	Tofo/Barra	26	0	0	0	0	0	NA
2012	11	30	2012-11-30	0.482639	Am	Tofo/Barra	27	0	0	0	0	0	NA
2012	11	30	2012-11-30	0.586111	Of	Tofo/Barra	26	0	0	0	0	0	NA
2012	11	30	2012-11-30	0.48125	RB	Tofo/Barra	26	0	0	0	0	0	NA
2012	11	30	2012-11-30	0.388194	XTC	Tofo/Barra	26	0	0	0	0	0	NA
2012	12	1	2012-12-01	0.477083	MR	Tofo/Barra	26	0	0	0	0	0	NA
2012	12	1	2012-12-01	0.378472	XTC	Tofo/Barra	25	0	0	0	0	0	NA
2012	12	5	2012-12-05	0.379167	XTC	Tofo/Barra	22	0	0	0	0	0	NA
2012	12	11	2012-12-11	0.3375	GC	Tofo/Barra	27	0	0	0	0	0	NA
2012	12	12	2012-12-12	0.349306	GC	Tofo/Barra	25	0	0	0	0	0	NA
2012	12	12	2012-12-12	0.608333	GC	Tofo/Barra	25	0	0	0	0	0	NA
2012	12	15	2012-12-15	0.373611	GC	Tofo/Barra	26	0	0	0	0	0	NA
2012	12	15	2012-12-15	0.66875	TT	Tofo/Barra	26	0	0	0	0	0	NA
2012	12	17	2012-12-17	0.457639	GC	Tofo/Barra	26	0	0	0	0	0	NA
2012	12	17	2012-12-17	0.393056	XTC	Tofo/Barra	26	0	0	0	0	0	NA
2012	12	18	2012-12-18	0.358333	GC	Tofo/Barra	26	0	0	0	0	0	NA
2012	12	18	2012-12-18	0.484722	TT	Tofo/Barra	26	0	0	0	0	0	NA
2012	12	19	2012-12-19	0.386111	MR	Tofo/Barra	26	0	0	0	0	0	NA
2012	12	19	2012-12-19	0.606944	SA	Tofo/Barra	24	0	0	0	0	0	NA
2012	12	20	2012-12-20	0.615278	AMP	Tofo/Barra	27	0	0	0	0	0	NA
2012	12	20	2012-12-20	0.40625	OF	Tofo/Barra	25	0	0	0	0	0	NA
2012	12	21	2012-12-21	0.546528	GC	Tofo/Barra	26	0	0	0	0	0	NA
2012	12	21	2012-12-21	0.386806	XTC	Tofo/Barra	27	0	0	0	0	0	NA
2012	12	22	2012-12-22	0.39375	MR	Tofo/Barra	27	0	0	0	0	0	NA
2012	12	23	2012-12-23	0.372222	GC	Tofo/Barra	25	0	0	0	0	0	NA
2012	12	24	2012-12-24	0.640278	MC	Tofo/Barra	27	0	0	0	0	0	NA
2012	12	24	2012-12-24	0.472917	MR	Tofo/Barra	27	0	0	0	0	0	NA
2012	12	24	2012-12-24	0.558333	SA	Tofo/Barra	27	0	0	0	0	0	NA
2012	12	26	2012-12-26	0.377778	XTC	Tofo/Barra	26	0	0	0	0	0	NA
2012	12	27	2012-12-27	0.63125	Sa	Tofo/Barra	27	0	0	0	0	0	NA
2012	12	28	2012-12-28	0.482639	GC	Tofo/Barra	28	0	0	0	0	0	NA
2012	12	28	2012-12-28	0.645139	MC	Tofo/Barra	27	0	0	0	0	0	NA
2012	12	28	2012-12-28	0.389583	MR	Tofo/Barra	27	0	0	0	0	0	NA
2012	12	28	2012-12-28	0.466667	MR	Tofo/Barra	25	0	0	0	0	0	NA
2012	12	28	2012-12-28	0.377083	XTC	Tofo/Barra	26	0	0	0	0	0	NA
2012	12	29	2012-12-29	0.346528	OF	Tofo/Barra	26	0	0	0	0	0	NA
2012	12	31	2012-12-31	0.472222	GC	Tofo/Barra	28	0	0	0	0	0	NA
2012	12	31	2012-12-31	0.334722	MR	Tofo/Barra	19	0	0	0	0	0	NA
2012	12	31	2012-12-31	0.634028	Sa	Tofo/Barra	21	0	0	0	0	0	NA
2012	12	31	2012-12-31	0.375	XTC	Tofo/Barra	25	0	0	0	0	0	NA
2013	1	2	2013-01-02	0.372917	OF	Tofo/Barra	24	0	0	0	0	0	NA
2013	1	3	2013-01-03	0.376389	MR	Tofo/Barra	25	0	0	0	0	0	NA
2013	1	5	2013-01-05	0.38125	GC	Tofo/Barra	27	0	0	0	0	0	NA
2013	1	10	2013-01-10	0.363194	GC	Tofo/Barra	26	0	0	0	0	0	NA
2013	1	13	2013-01-13	0.500694	GC	Tofo/Barra	27	0	0	0	0	0	NA
2013	1	16	2013-01-16	0.389583	Of	Tofo/Barra	25	0	0	0	0	0	NA
2013	1	24	2013-01-24	0.3625	GC	Tofo/Barra	27	0	0	0	0	0	NA
2013	1	28	2013-01-28	0.360417	GC	Tofo/Barra	27	0	0	0	0	0	NA
2013	1	30	2013-01-30	0.373611	SF	Tofo/Barra	26	0	0	0	0	0	NA
2013	1	31	2013-01-31	0.3875	MR	Tofo/Barra	27	0	0	0	0	0	NA
2013	2	1	2013-02-01	0.581944	GC	Tofo/Barra	28	0	0	0	0	0	NA
2013	2	2	2013-02-02	0.380556	TT	Tofo/Barra	27	0	0	0	0	0	NA
2013	2	3	2013-02-03	0.58125	GC	Tofo/Barra	27	0	0	0	0	0	NA
2013	2	4	2013-02-04	0.499306	GC	Tofo/Barra	27	0	0	0	0	0	NA
2013	2	4	2013-02-04	0.38125	OF	Tofo/Barra	27	0	0	0	0	0	NA
2013	2	5	2013-02-05	0.35625	GC	Tofo/Barra	27	0	0	0	0	0	NA
2013	2	6	2013-02-06	0.367361	SF	Tofo/Barra	27	0	0	0	0	0	NA
2013	2	7	2013-02-07	0.392361	AM	Tofo/Barra	27	0	0	0	0	0	NA
2013	2	7	2013-02-07	0.48125	OF	Tofo/Barra	27	0	0	0	0	0	NA
2013	2	8	2013-02-08	0.461806	GC	Tofo/Barra	28	0	0	0	0	0	NA
2013	2	8	2013-02-08	0.372222	XTC	Tofo/Barra	27	1	1	0	0	1	No
2013	2	10	2013-02-10	0.460417	MR	Tofo/Barra	27	0	0	0	0	0	NA
2013	2	10	2013-02-10	0.368056	XTC	Tofo/Barra	28	0	0	0	0	0	NA
2013	2	11	2013-02-11	0.474306	CO	Tofo/Barra	26	0	0	0	0	0	NA
2013	2	11	2013-02-11	0.38125	OF	Tofo/Barra	28	0	0	0	0	0	NA
2013	2	13	2013-02-13	0.3625	GC	Tofo/Barra	26	0	0	0	0	0	NA
2013	2	14	2013-02-14	0.372917	AMP	Tofo/Barra	28	0	0	0	0	0	NA
2013	2	14	2013-02-14	0.471528	MR	Tofo/Barra	27	0	0	0	0	0	NA
2013	2	15	2013-02-15	0.576389	GC	Tofo/Barra	28	0	0	0	0	0	NA
2013	2	17	2013-02-17	0.354861	GC	Tofo/Barra	23	0	0	0	0	0	NA
2013	2	18	2013-02-18	0.377778	RE	Tofo/Barra	24	0	0	0	0	0	NA
2013	2	24	2013-02-24	0.484028	OF	Tofo/Barra	27	0	0	0	0	0	NA
2013	2	24	2013-02-24	0.358333	RE	Tofo/Barra	27	0	0	0	0	0	NA
2013	2	28	2013-02-28	0.36875	KHA	Tofo/Barra	28	0	0	0	0	0	NA
2013	3	1	2013-03-01	0.583333	KHA	Tofo/Barra	26	0	0	0	0	0	NA
2013	3	2	2013-03-02	0.381944	CA	Tofo/Barra	26	0	0	0	0	0	NA
2013	3	2	2013-03-02	0.470139	CO	Tofo/Barra	27	0	0	0	0	0	NA
2013	3	3	2013-03-03	0.565972	GC	Tofo/Barra	24	0	0	0	0	0	NA
2013	3	4	2013-03-04	0.599306	OF	Tofo/Barra	27	0	0	0	0	0	NA
2013	3	4	2013-03-04	0.364583	RE	Tofo/Barra	27	0	0	0	0	0	NA
2013	3	4	2013-03-04	0.459028	RE	Tofo/Barra	26	0	0	0	0	0	NA
2013	3	5	2013-03-05	0.586806	GC	Tofo/Barra	27	0	0	0	0	0	NA
2013	3	5	2013-03-05	0.481944	MR	Tofo/Barra	28	0	0	0	0	0	NA
2013	3	5	2013-03-05	0.356944	XTC	Tofo/Barra	27	0	0	0	0	0	NA
2013	3	6	2013-03-06	0.357639	MR	Tofo/Barra	27	0	0	0	0	0	NA
2013	3	6	2013-03-06	0.597917	RE	Tofo/Barra	26	0	0	0	0	0	NA
2013	3	7	2013-03-07	0.597222	ST	Tofo/Barra	27	0	0	0	0	0	NA
2013	3	7	2013-03-07	0.370833	XTC	Tofo/Barra	27	0	0	0	0	0	NA
2013	3	8	2013-03-08	0.370833	RB	Tofo/Barra	26	0	0	0	0	0	NA
2013	3	9	2013-03-09	0.352083	GC	Tofo/Barra	25	0	0	0	0	0	NA
2013	3	10	2013-03-10	0.467361	GC	Tofo/Barra	24	0	0	0	0	0	NA
2013	3	11	2013-03-11	0.349306	GC	Tofo/Barra	27	0	0	0	0	0	NA
2013	3	12	2013-03-12	0.364583	GC	Tofo/Barra	25	0	0	0	0	0	NA
2013	3	12	2013-03-12	0.583333	SF	Tofo/Barra	27	0	0	0	0	0	NA
2013	3	13	2013-03-13	0.475	GC	Tofo/Barra	27	0	0	0	0	0	NA
2013	3	13	2013-03-13	0.38125	RE	Tofo/Barra	27	0	0	0	0	0	NA
2013	3	14	2013-03-14	0.35	GC	Tofo/Barra	27	0	0	0	0	0	NA
2013	3	14	2013-03-14	0.464583	GC	Tofo/Barra	27	0	0	0	0	0	NA
2013	3	15	2013-03-15	0.364583	MR	Tofo/Barra	27	0	0	0	0	0	NA
2013	3	17	2013-03-17	0.415278	MVS	Zavora	27	0	0	0	0	0	NA
2013	3	17	2013-03-17	0.519444	RS	Zavora	27	0	0	0	0	0	NA
2013	3	19	2013-03-19	0.374306	MR	Tofo/Barra	27	0	0	0	0	0	NA
2013	3	21	2013-03-21	0.461806	GC	Tofo/Barra	27	0	0	0	0	0	NA
2013	3	21	2013-03-21	0.461111	PE	Tofo/Barra	27	0	0	0	0	0	NA
2013	3	22	2013-03-22	0.455556	SF	Tofo/Barra	26	0	0	0	0	0	NA
2013	3	23	2013-03-23	0.461111	GC	Tofo/Barra	27	0	0	0	0	0	NA
2013	3	23	2013-03-23	0.367361	RE	Tofo/Barra	26	0	0	0	0	0	NA
2013	3	24	2013-03-24	0.479861	GC	Tofo/Barra	26	0	0	0	0	0	NA
2013	3	24	2013-03-24	0.366667	MR	Tofo/Barra	26	0	0	0	0	0	NA
2013	3	26	2013-03-26	0.355556	OF	Tofo/Barra	26	0	0	0	0	0	NA
2013	3	26	2013-03-26	0.484722	SF	Tofo/Barra	28	0	0	0	0	0	NA
2013	3	27	2013-03-27	0.352083	RE	Tofo/Barra	26	0	0	0	0	0	NA
2013	3	29	2013-03-29	0.356944	XTC	Tofo/Barra	27	0	0	0	0	0	NA
2013	3	30	2013-03-30	0.371528	MR	Tofo/Barra	27	0	0	0	0	0	NA
2013	3	31	2013-03-31	0.350694	OF	Tofo/Barra	26	0	0	0	0	0	NA
2013	4	1	2013-04-01	0.366667	XTC	Tofo/Barra	26	0	0	0	0	0	NA
2013	4	3	2013-04-03	0.350694	MR	Tofo/Barra	26	0	0	0	0	0	NA
2013	4	5	2013-04-05	0.329167	GC	Tofo/Barra	24	0	0	0	0	0	NA
2013	4	5	2013-04-05	0.335417	GC	Tofo/Barra	27	0	0	0	0	0	NA
2013	4	7	2013-04-07	0.366667	MR	Tofo/Barra	26	0	0	0	0	0	NA
2013	4	9	2013-04-09	0.364583	XTC	Tofo/Barra	26	0	0	0	0	0	NA
2013	4	10	2013-04-10	0.354167	MR	Tofo/Barra	25	0	0	0	0	0	NA
2013	4	10	2013-04-10	0.571528	SF	Tofo/Barra	26	0	0	0	0	0	NA
2013	4	11	2013-04-11	0.351389	GC	Tofo/Barra	26	0	0	0	0	0	NA
2013	4	12	2013-04-12	0.327083	GC	Tofo/Barra	26	0	0	0	0	0	NA
2013	4	13	2013-04-13	0.375694	SF	Tofo/Barra	24	0	0	0	0	0	NA
2013	4	17	2013-04-17	0.35625	OF	Tofo/Barra	25	0	0	0	0	0	NA
2013	4	18	2013-04-18	0.349306	XTC	Tofo/Barra	23	0	0	0	0	0	NA
2013	4	19	2013-04-19	0.348611	RE	Tofo/Barra	26	0	0	0	0	0	NA
2013	4	20	2013-04-20	0.454167	GC	Tofo/Barra	24	0	0	0	0	0	NA
2013	4	20	2013-04-20	0.354861	MR	Tofo/Barra	24	0	0	0	0	0	NA
2013	4	22	2013-04-22	0.360417	XTC	Tofo/Barra	23	0	0	0	0	0	NA
2013	4	23	2013-04-23	0.622917	GC	Tofo/Barra	26	0	0	0	0	0	NA
2013	4	30	2013-04-30	0.351389	OF	Tofo/Barra	25	0	0	0	0	0	NA
2013	5	1	2013-05-01	0.3625	XTC	Tofo/Barra	25	0	0	0	0	0	NA
2013	5	2	2013-05-02	0.354167	MR	Tofo/Barra	25	1	1	1	0	0	No
2013	5	4	2013-05-04	0.341667	GC	Tofo/Barra	25	1	1	0	0	1	Yes	20130504_D1_GC_Dm2.13m_DorsalIDWithLasers_IMG_5705_TH and 20130504_D1_GC_Dm2.13m_SwimmingWithCoachmenCleaning_TH_IMG_5700
2013	5	5	2013-05-05	0.322917	SF	Tofo/Barra	24	0	0	0	0	0	NA
2013	5	8	2013-05-08	0.359722	MR	Tofo/Barra	25	0	0	0	0	0	NA
2013	5	9	2013-05-09	0.357639	MR	Tofo/Barra	25	0	0	0	0	0	NA
2013	5	10	2013-05-10	0.338194	GC	Tofo/Barra	24	0	0	0	0	0	NA
2013	5	10	2013-05-10	0.561111	TT	Tofo/Barra	25	0	0	0	0	0	NA
2013	5	12	2013-05-12	0.421528	AR	Zavora	25	0	0	0	0	0	NA
2013	5	12	2013-05-12	0.454167	GC	Tofo/Barra	25	0	0	0	0	0	NA
2013	5	12	2013-05-12	0.361111	MR	Tofo/Barra	24	0	0	0	0	0	NA
2013	5	12	2013-05-12	0.509028	RS	Zavora	25	0	0	0	0	0	NA
2013	5	13	2013-05-13	0.427778	RS	Zavora	24	0	0	0	0	0	NA
2013	5	13	2013-05-13	0.527083	SC	Zavora	24	0	0	0	0	0	NA
2013	5	13	2013-05-13	0.341667	SF	Tofo/Barra	24	0	0	0	0	0	NA
2013	5	14	2013-05-14	0.584028	GC	Tofo/Barra	24	0	0	0	0	0	NA
2013	5	14	2013-05-14	0.361806	OF	Tofo/Barra	25	0	0	0	0	0	NA
2013	5	14	2013-05-14	0.447222	RS	Zavora	24	0	0	0	0	0	NA
2013	5	14	2013-05-14	0.576389	RS	Zavora	24	0	0	0	0	0	NA
2013	5	15	2013-05-15	0.411806	GWS	Zavora	23	0	0	0	0	0	NA
2013	5	15	2013-05-15	0.358333	MR	Tofo/Barra	24	0	0	0	0	0	NA
2013	5	15	2013-05-15	0.489583	RS	Zavora	24	0	0	0	0	0	NA
2013	5	16	2013-05-16	0.360417	GC	Tofo/Barra	24	0	0	0	0	0	NA
2013	5	17	2013-05-17	0.356944	MR	Tofo/Barra	23	0	0	0	0	0	NA
2013	5	18	2013-05-18	0.375694	GC	Tofo/Barra	25	1	1	0	1	0	Yes	20130518_GC_Dm_2mF_Frida_TH_IMG_0050 (4 pictures)
2013	5	20	2013-05-20	0.336111	GC	Tofo/Barra	25	0	0	0	0	0	NA
2013	5	21	2013-05-21	0.352778	ST	Tofo/Barra	24	0	0	0	0	0	NA
2013	5	21	2013-05-21	0.534722	TM	Bazaruto Archipelago/San Sebastian	25	0	0	0	0	0	NA
2013	5	22	2013-05-22	0.3625	XTC	Tofo/Barra	24	0	0	0	0	0	NA
2013	5	23	2013-05-23	0.352083	SF	Tofo/Barra	24	0	0	0	0	0	NA
2013	5	25	2013-05-25	0.380556	OF	Tofo/Barra	24	0	0	0	0	0	NA
2013	5	25	2013-05-25	0.482639	RE	Tofo/Barra	24	0	0	0	0	0	NA
2013	5	27	2013-05-27	0.379167	MR	Tofo/Barra	22	0	0	0	0	0	NA
2013	5	28	2013-05-28	0.356944	GC	Tofo/Barra	23	1	1	1	0	0	No
2013	5	29	2013-05-29	0.494444	TM	Bazaruto Archipelago/San Sebastian	25	0	0	0	0	0	NA
2013	5	30	2013-05-30	0.364583	MR	Tofo/Barra	24	0	0	0	0	0	NA
2013	5	30	2013-05-30	0.447222	TM	Bazaruto Archipelago/San Sebastian	25	0	0	0	0	0	NA
2013	6	3	2013-06-03	0.542361	GC	Tofo/Barra	23	0	0	0	0	0	NA
2013	6	3	2013-06-03	0.393056	RE	Tofo/Barra	24	0	0	0	0	0	NA
2013	6	4	2013-06-04	0.370139	MA	Tofo/Barra	22	0	0	0	0	0	NA
2013	6	4	2013-06-04	0.461806	XTC	Tofo/Barra	23	0	0	0	0	0	NA
2013	6	5	2013-06-05	0.386806	OF	Tofo/Barra	23	0	0	0	0	0	NA
2013	6	7	2013-06-07	0.377778	MR	Tofo/Barra	23	0	0	0	0	0	NA
2013	6	11	2013-06-11	0.365972	MR	Tofo/Barra	24	0	0	0	0	0	NA
2013	6	12	2013-06-12	0.371528	MR	Tofo/Barra	23	0	0	0	0	0	NA
2013	6	12	2013-06-12	0.477083	XTC	Tofo/Barra	23	0	0	0	0	0	NA
2013	6	13	2013-06-13	0.3625	OF	Tofo/Barra	23	0	0	0	0	0	NA
2013	6	14	2013-06-14	0.345833	XTC	Tofo/Barra	21	0	0	0	0	0	NA
2013	6	15	2013-06-15	0.563889	GC	Tofo/Barra	23	0	0	0	0	0	NA
2013	6	18	2013-06-18	0.400694	RE	Tofo/Barra	24	0	0	0	0	0	NA
2013	6	19	2013-06-19	0.381944	OF	Tofo/Barra	23	0	0	0	0	0	NA
2013	6	20	2013-06-20	0.648611	XTC	Tofo/Barra	23	1	2	1	1	0	Yes	20130620_GC_Dm2_M_Claspershot_LW_P6202807 (3 pictures)
2013	6	21	2013-06-21	0.366667	XTC	Tofo/Barra	23	0	0	0	0	0	NA
2013	6	22	2013-06-22	0.38125	AM	Tofo/Barra	23	0	0	0	0	0	NA
2013	6	22	2013-06-22	0.475	RE	Tofo/Barra	23	0	0	0	0	0	NA
2013	6	23	2013-06-23	0.547917	MC	Tofo/Barra	22	0	0	0	0	0	NA
2013	6	23	2013-06-23	0.354167	MR	Tofo/Barra	22	0	0	0	0	0	NA
2013	6	24	2013-06-24	0.595139	GC	Tofo/Barra	23	0	0	0	0	0	NA
2013	6	24	2013-06-24	0.354167	MR	Tofo/Barra	22	0	0	0	0	0	NA
2013	6	24	2013-06-24	0.475694	MR	Tofo/Barra	24	0	0	0	0	0	NA
2013	6	25	2013-06-25	0.356944	OF	Tofo/Barra	23	0	0	0	0	0	NA
2013	6	26	2013-06-26	0.365278	MR	Tofo/Barra	21	0	0	0	0	0	NA
2013	6	28	2013-06-28	0.345139	GC	Tofo/Barra	22	0	0	0	0	0	NA
2013	6	29	2013-06-29	0.380556	OF	Tofo/Barra	21	0	0	0	0	0	NA
2013	6	29	2013-06-29	0.478472	RE	Tofo/Barra	18	0	0	0	0	0	NA
2013	6	29	2013-06-29	0.333333	SP	Bazaruto Archipelago/San Sebastian	24	0	0	0	0	0	NA
2013	6	29	2013-06-29	0.358333	SP	Bazaruto Archipelago/San Sebastian	24	0	0	0	0	0	NA
2013	6	29	2013-06-29	0.406944	SP	Bazaruto Archipelago/San Sebastian	24	0	0	0	0	0	NA
2013	6	29	2013-06-29	0.43125	SP	Bazaruto Archipelago/San Sebastian	24	0	0	0	0	0	NA
2013	6	30	2013-06-30	0.393056	MR	Tofo/Barra	24	0	0	0	0	0	NA
2013	6	30	2013-06-30	0.325694	SP	Bazaruto Archipelago/San Sebastian	24	0	0	0	0	0	NA
2013	6	30	2013-06-30	0.355556	SP	Bazaruto Archipelago/San Sebastian	22	0	0	0	0	0	NA
2013	7	1	2013-07-01	0.446528	SP	Bazaruto Archipelago/San Sebastian	24	0	0	0	0	0	NA
2013	7	1	2013-07-01	0.514583	SP	Bazaruto Archipelago/San Sebastian	24	0	0	0	0	0	NA
2013	7	2	2013-07-02	0.456944	SP	Bazaruto Archipelago/San Sebastian	22	0	0	0	0	0	NA
2013	7	2	2013-07-02	0.486806	SP	Bazaruto Archipelago/San Sebastian	20	0	0	0	0	0	NA
2013	7	2	2013-07-02	0.525	SP	Bazaruto Archipelago/San Sebastian	22	0	0	0	0	0	NA
2013	7	2	2013-07-02	0.549306	SP	Bazaruto Archipelago/San Sebastian	22	0	0	0	0	0	NA
2013	7	3	2013-07-03	0.350694	MR	Tofo/Barra	20	0	0	0	0	0	NA
2013	7	3	2013-07-03	0.472222	SP	Bazaruto Archipelago/San Sebastian	20	0	0	0	0	0	NA
2013	7	3	2013-07-03	0.502083	SP	Bazaruto Archipelago/San Sebastian	21	0	0	0	0	0	NA
2013	7	3	2013-07-03	0.547222	SP	Bazaruto Archipelago/San Sebastian	22	0	0	0	0	0	NA
2013	7	3	2013-07-03	0.570833	SP	Bazaruto Archipelago/San Sebastian	23	0	0	0	0	0	NA
2013	7	4	2013-07-04	0.468056	3P	Bazaruto Archipelago/San Sebastian	24	0	0	0	0	0	NA
2013	7	4	2013-07-04	0.384722	AR	Bazaruto Archipelago/San Sebastian	24	0	0	0	0	0	NA
2013	7	4	2013-07-04	0.553472	CH	Bazaruto Archipelago/San Sebastian	24	0	0	0	0	0	NA
2013	7	7	2013-07-07	0.458333	MR	Tofo/Barra	24	0	0	0	0	0	NA
2013	7	7	2013-07-07	0.348611	OF	Tofo/Barra	23	0	0	0	0	0	NA
2013	7	8	2013-07-08	0.539583	GC	Tofo/Barra	23	0	0	0	0	0	NA
2013	7	9	2013-07-09	0.361111	RE	Tofo/Barra	23	0	0	0	0	0	NA
2013	7	10	2013-07-10	0.34375	GC	Tofo/Barra	23	0	0	0	0	0	NA
2013	7	11	2013-07-11	0.345833	GC	Tofo/Barra	23	1	3	1	1	1	Yes	20130711_GC_Dm1_M_DorsalID_LB_P1050436 and 20130711_GC_Dm2_F_DorsalID_LB_P1050444
2013	7	11	2013-07-11	0.497917	GC	Tofo/Barra	23	0	0	0	0	0	NA
2013	7	12	2013-07-12	0.367361	GC	Tofo/Barra	23	0	0	0	0	0	NA
2013	7	15	2013-07-15	0.360417	MR	Tofo/Barra	23	0	0	0	0	0	NA
2013	7	15	2013-07-15	0.554861	ST	Tofo/Barra	24	0	0	0	0	0	NA
2013	7	17	2013-07-17	0.604167	SP	Bazaruto Archipelago/San Sebastian	22	0	0	0	0	0	NA
2013	7	18	2013-07-18	0.340278	GC	Tofo/Barra	23	1	3	1	2	0	Yes	20130718_GC_Dm1_F_DorsalID_LB_P1050466_2 (3 pictures)
2013	7	19	2013-07-19	0.338889	SF	Tofo/Barra	23	0	0	0	0	0	NA
2013	7	21	2013-07-21	0.583333	SP	Bazaruto Archipelago/San Sebastian	22	0	0	0	0	0	NA
2013	7	22	2013-07-22	0.372222	OF	Tofo/Barra	23	0	0	0	0	0	NA
2013	7	26	2013-07-26	0.345139	OF	Tofo/Barra	23	0	0	0	0	0	NA
2013	7	27	2013-07-27	0.479861	GC	Tofo/Barra	23	0	0	0	0	0	NA
2013	7	27	2013-07-27	0.416667	SP	Bazaruto Archipelago/San Sebastian	21	0	0	0	0	0	NA
2013	7	27	2013-07-27	0.363194	XTC	Tofo/Barra	NA	0	0	0	0	0	NA
2013	7	31	2013-07-31	0.340972	ST	Tofo/Barra	23	0	0	0	0	0	NA
2013	8	5	2013-08-05	0.402083	DE	Zavora	22	0	0	0	0	0	NA
2013	8	5	2013-08-05	0.481944	RS	Zavora	22	0	0	0	0	0	NA
2013	8	6	2013-08-06	0.572917	RS	Zavora	22	0	0	0	0	0	NA
2013	8	6	2013-08-06	0.498611	WS	Zavora	22	0	0	0	0	0	NA
2013	8	7	2013-08-07	0.422917	AR	Zavora	22	0	0	0	0	0	NA
2013	8	7	2013-08-07	0.523611	RS	Zavora	22	0	0	0	0	0	NA
2013	8	9	2013-08-09	0.3875	RE	Tofo/Barra	23	0	0	0	0	0	NA
2013	8	10	2013-08-10	0.358333	MR	Tofo/Barra	19	0	0	0	0	0	NA
2013	8	12	2013-08-12	0.352778	GC	Tofo/Barra	22	0	0	0	0	0	NA
2013	8	16	2013-08-16	0.3625	XTC	Tofo/Barra	22	0	0	0	0	0	NA
2013	8	17	2013-08-17	0.471528	GC	Tofo/Barra	22	1	1	0	1	0	No
2013	8	17	2013-08-17	0.363889	MR	Tofo/Barra	22	1	1	0	1	0	No
2013	8	21	2013-08-21	0.36875	MR	Tofo/Barra	22	0	0	0	0	0	NA
2013	8	23	2013-08-23	0.36875	GC	Tofo/Barra	22	1	2	0	0	2	No
2013	8	26	2013-08-26	0.361806	MR	Tofo/Barra	22	0	0	0	0	0	NA
2013	8	27	2013-08-27	0.541667	GC	Tofo/Barra	22	0	0	0	0	0	NA
2013	8	28	2013-08-28	0.339583	GC	Tofo/Barra	21	0	0	0	0	0	NA
2013	9	1	2013-09-01	0.4	MR	Tofo/Barra	21	0	0	0	0	0	NA
2013	9	3	2013-09-03	0.349306	RE	Tofo/Barra	21	0	0	0	0	0	NA
2013	9	4	2013-09-04	0.506944	DE	Zavora	22	0	0	0	0	0	NA
2013	9	4	2013-09-04	0.378472	GC	Tofo/Barra	21	0	0	0	0	0	NA
2013	9	4	2013-09-04	0.579167	RS	Zavora	22	0	0	0	0	0	NA
2013	9	5	2013-09-05	0.377778	RS	Zavora	21	1	2	1	0	1	Yes	20130905_RS_Dm1_M_DorsalID_CP_1030496 (4 pictures)
2013	9	9	2013-09-09	0.477083	GC	Tofo/Barra	21	0	0	0	0	0	NA
2013	9	9	2013-09-09	0.36875	MR	Tofo/Barra	21	0	0	0	0	0	NA
2013	9	10	2013-09-10	0.447222	MR	Tofo/Barra	20	0	0	0	0	0	NA
2013	9	10	2013-09-10	0.363889	XTC	Tofo/Barra	19	0	0	0	0	0	NA
2013	9	11	2013-09-11	0.364583	XTC	Tofo/Barra	19	1	2	0	0	2	No
2013	9	12	2013-09-12	0.345833	RE	Tofo/Barra	23	0	0	0	0	0	NA
2013	9	14	2013-09-14	0.517361	GC	Tofo/Barra	20	0	0	0	0	0	NA
2013	9	14	2013-09-14	0.404861	MR	Tofo/Barra	21	0	0	0	0	0	NA
2013	9	17	2013-09-17	0.35625	MR	Tofo/Barra	22	0	0	0	0	0	NA
2013	9	18	2013-09-18	0.618056	GC	Tofo/Barra	20	0	0	0	0	0	NA
2013	9	18	2013-09-18	0.35625	OF	Tofo/Barra	23	0	0	0	0	0	NA
2013	9	19	2013-09-19	0.554167	MR	Tofo/Barra	21	0	0	0	0	0	NA
2013	9	19	2013-09-19	0.361806	OF	Tofo/Barra	22	0	0	0	0	0	NA
2013	9	20	2013-09-20	0.347917	MR	Tofo/Barra	21	0	0	0	0	0	NA
2013	9	22	2013-09-22	0.461806	GC	Tofo/Barra	23	0	0	0	0	0	NA
2013	9	22	2013-09-22	0.525694	SA	Tofo/Barra	24	0	0	0	0	0	NA
2013	9	23	2013-09-23	0.606944	GC	Tofo/Barra	24	0	0	0	0	0	NA
2013	9	23	2013-09-23	0.477083	MR	Tofo/Barra	23	0	0	0	0	0	NA
2013	9	24	2013-09-24	0.481944	GC	Tofo/Barra	25	0	0	0	0	0	NA
2013	9	24	2013-09-24	0.38125	OF	Tofo/Barra	24	0	0	0	0	0	NA
2013	9	25	2013-09-25	0.336111	RE	Tofo/Barra	22	0	0	0	0	0	NA
2013	9	25	2013-09-25	0.413194	TM	Bazaruto Archipelago/San Sebastian	24	0	0	0	0	0	NA
2013	9	25	2013-09-25	0.452083	TM	Bazaruto Archipelago/San Sebastian	24	0	0	0	0	0	NA
2013	9	26	2013-09-26	0.577778	SF	Tofo/Barra	21	0	0	0	0	0	NA
2013	9	26	2013-09-26	0.377778	XTC	Tofo/Barra	22	0	0	0	0	0	NA
2013	9	27	2013-09-27	0.375694	RS	Zavora	22	0	0	0	0	0	NA
2013	9	27	2013-09-27	0.472917	RS	Zavora	22	0	0	0	0	0	NA
2013	9	28	2013-09-28	0.493056	GC	Tofo/Barra	21	0	0	0	0	0	NA
2013	9	28	2013-09-28	0.383333	MR	Tofo/Barra	20	0	0	0	0	0	NA
2013	9	28	2013-09-28	0.281944	RS	Zavora	23	0	0	0	0	0	NA
2013	9	28	2013-09-28	0.46875	RS	Zavora	21	0	0	0	0	0	NA
2013	9	28	2013-09-28	0.36875	WS	Zavora	21	0	0	0	0	0	NA
2013	10	3	2013-10-03	0.403472	MA	Tofo/Barra	23	0	0	0	0	0	NA
2013	10	4	2013-10-04	0.354861	MR	Tofo/Barra	23	0	0	0	0	0	NA
2013	10	6	2013-10-06	0.370139	OF	Tofo/Barra	23	0	0	0	0	0	NA
2013	10	6	2013-10-06	0.471528	RE	Tofo/Barra	23	0	0	0	0	0	NA
2013	10	7	2013-10-07	0.357639	MR	Tofo/Barra	19	0	0	0	0	0	NA
2013	10	10	2013-10-10	0.365278	GC	Tofo/Barra	22	0	0	0	0	0	NA
2013	10	11	2013-10-11	0.434028	MRB	Bazaruto Archipelago/San Sebastian	24	0	0	0	0	0	NA
2013	10	11	2013-10-11	0.638194	SP	Bazaruto Archipelago/San Sebastian	23	0	0	0	0	0	NA
2013	10	15	2013-10-15	0.357639	GC	Tofo/Barra	23	0	0	0	0	0	NA
2013	10	16	2013-10-16	0.4375	MR	Tofo/Barra	NA	0	0	0	0	0	NA
2013	10	16	2013-10-16	0.577778	Southern Baz Listening Station	Bazaruto Archipelago/San Sebastian	NA	0	0	0	0	0	NA
2013	10	16	2013-10-16	0.459028	TM	Bazaruto Archipelago/San Sebastian	NA	0	0	0	0	0	NA
2013	10	16	2013-10-16	0.606944	TM	Bazaruto Archipelago/San Sebastian	NA	0	0	0	0	0	NA
2013	10	17	2013-10-17	0.540278	MRB	Bazaruto Archipelago/San Sebastian	23	0	0	0	0	0	NA
2013	10	17	2013-10-17	0.388194	OF	Tofo/Barra	22	0	0	0	0	0	NA
2013	10	17	2013-10-17	0.583333	SA	Tofo/Barra	23	0	0	0	0	0	NA
2013	10	18	2013-10-18	0.3875	MR	Tofo/Barra	23	0	0	0	0	0	NA
2013	10	18	2013-10-18	0.4125	SP	Bazaruto Archipelago/San Sebastian	23	0	0	0	0	0	NA
2013	10	18	2013-10-18	0.583333	ST	Tofo/Barra	23	0	0	0	0	0	NA
2013	10	19	2013-10-19	0.333333	AMP	Tofo/Barra	19	0	0	0	0	0	NA
2013	10	20	2013-10-20	0.448611	3P	Bazaruto Archipelago/San Sebastian	23	0	0	0	0	0	NA
2013	10	20	2013-10-20	0.54375	CH	Bazaruto Archipelago/San Sebastian	25	0	0	0	0	0	NA
2013	10	23	2013-10-23	0.625	SA	Tofo/Barra	20	0	0	0	0	0	NA
2013	10	24	2013-10-24	0.338194	MR	Tofo/Barra	23	0	0	0	0	0	NA
2013	10	25	2013-10-25	0.385417	SP	Bazaruto Archipelago/San Sebastian	23	1	1	0	0	1	Yes	20131025_PI_._Dm1_DorsalID_KE_GOPR0637
2013	10	26	2013-10-26	0.695833	BB	Bazaruto Archipelago/San Sebastian	23	0	0	0	0	0	NA
2013	10	26	2013-10-26	0.652083	SP	Bazaruto Archipelago/San Sebastian	24	0	0	0	0	0	NA
2013	10	27	2013-10-27	0.570139	MRB	Bazaruto Archipelago/San Sebastian	24	0	0	0	0	0	NA
2013	10	27	2013-10-27	0.524306	SP	Bazaruto Archipelago/San Sebastian	23	0	0	0	0	0	NA
2013	10	28	2013-10-28	0.388889	GC	Tofo/Barra	22	0	0	0	0	0	NA
2013	10	29	2013-10-29	0.5	GC	Tofo/Barra	22	0	0	0	0	0	NA
2013	10	29	2013-10-29	0.427083	MR	Tofo/Barra	22	0	0	0	0	0	NA
2013	10	31	2013-10-31	0.329861	GC	Tofo/Barra	20	0	0	0	0	0	NA
2013	11	4	2013-11-04	0.343056	MR	Tofo/Barra	23	0	0	0	0	0	NA
2013	11	5	2013-11-05	0.281944	SP	Bazaruto Archipelago/San Sebastian	25	1	1	0	1	0	Yes	20131105_PI_Dm_F_DorsalID_KE_IMG0221
2013	11	7	2013-11-07	0.627778	TR	Bazaruto Archipelago/San Sebastian	25	0	0	0	0	0	NA
2013	11	8	2013-11-08	0.540278	BB	Bazaruto Archipelago/San Sebastian	25	0	0	0	0	0	NA
2013	11	8	2013-11-08	0.642361	TR	Bazaruto Archipelago/San Sebastian	24	0	0	0	0	0	NA
2013	11	9	2013-11-09	0.625	SP	Bazaruto Archipelago/San Sebastian	25	0	0	0	0	0	NA
2013	11	10	2013-11-10	0.402778	SP	Bazaruto Archipelago/San Sebastian	25	0	0	0	0	0	NA
2013	11	11	2013-11-11	0.315972	GC	Tofo/Barra	18	1	1	0	1	0	Yes	20131111_GC_Db_F_DorsalID_LB
2013	11	11	2013-11-11	0.391667	SP	Bazaruto Archipelago/San Sebastian	24	0	0	0	0	0	NA
2013	11	11	2013-11-11	0.466667	SP	Bazaruto Archipelago/San Sebastian	24	0	0	0	0	0	NA
2013	11	12	2013-11-12	0.4875	SP	Bazaruto Archipelago/San Sebastian	25	0	0	0	0	0	NA
2013	11	13	2013-11-13	0.359722	GC	Tofo/Barra	21	0	0	0	0	0	NA
2013	11	13	2013-11-13	0.5125	SP	Bazaruto Archipelago/San Sebastian	24	1	1	1	0	0	Yes	20131113_PI_Dm_M_DorsalID_CAL_IMG0412 and 20131113_PI_Dm_M_PelvicFins_CAL_IMG0416
2013	11	14	2013-11-14	0.532639	TR	Bazaruto Archipelago/San Sebastian	26	0	0	0	0	0	NA
2013	11	16	2013-11-16	0.630556	SP	Bazaruto Archipelago/San Sebastian	25	0	0	0	0	0	NA
2013	11	18	2013-11-18	0.390972	MR	Tofo/Barra	20	0	0	0	0	0	NA
2013	11	19	2013-11-19	0.380556	RE	Tofo/Barra	21	0	0	0	0	0	NA
2013	11	20	2013-11-20	0.377083	GC	Tofo/Barra	23	0	0	0	0	0	NA
2013	11	21	2013-11-21	0.327083	MR	Tofo/Barra	18	0	0	0	0	0	NA
2013	11	21	2013-11-21	0.458333	MR	Tofo/Barra	18	0	0	0	0	0	NA
2013	11	23	2013-11-23	0.493056	GC	Tofo/Barra	19	0	0	0	0	0	NA
2013	11	23	2013-11-23	0.390972	MR	Tofo/Barra	23	0	0	0	0	0	NA
2013	11	26	2013-11-26	0.39375	OF	Tofo/Barra	23	0	0	0	0	0	NA
2013	11	26	2013-11-26	0.405556	SP	Bazaruto Archipelago/San Sebastian	26	0	0	0	0	0	NA
2013	11	27	2013-11-27	0.364583	MR	Tofo/Barra	20	0	0	0	0	0	NA
2013	11	28	2013-11-28	0.400694	XTC	Tofo/Barra	21	0	0	0	0	0	NA
2013	11	29	2013-11-29	0.588889	MC	Tofo/Barra	24	0	0	0	0	0	NA
2013	11	29	2013-11-29	0.634722	SA	Tofo/Barra	23	0	0	0	0	0	NA
2013	12	1	2013-12-01	0.379861	OF	Tofo/Barra	22	0	0	0	0	0	NA
2013	12	1	2013-12-01	0.475694	SA	Tofo/Barra	22	0	0	0	0	0	NA
2013	12	2	2013-12-02	0.388194	MR	Tofo/Barra	24	0	0	0	0	0	NA
2013	12	3	2013-12-03	0.375	GC	Tofo/Barra	21	0	0	0	0	0	NA
2013	12	4	2013-12-04	0.599306	MC	Tofo/Barra	22	0	0	0	0	0	NA
2013	12	4	2013-12-04	0.397222	MR	Tofo/Barra	24	0	0	0	0	0	NA
2013	12	5	2013-12-05	0.449306	DE	Zavora	24	0	0	0	0	0	NA
2013	12	5	2013-12-05	0.5	GC	Tofo/Barra	20	0	0	0	0	0	NA
2013	12	5	2013-12-05	0.543056	RS	Zavora	26	0	0	0	0	0	NA
2013	12	10	2013-12-10	0.366667	MR	Tofo/Barra	24	0	0	0	0	0	NA
2013	12	11	2013-12-11	0.3875	RE	Tofo/Barra	24	0	0	0	0	0	NA
2013	12	13	2013-12-13	0.427083	AMP	Tofo/Barra	23	0	0	0	0	0	NA
2013	12	13	2013-12-13	0.413194	RS	Zavora	20	0	0	0	0	0	NA
2013	12	13	2013-12-13	0.513889	RS	Zavora	24	0	0	0	0	0	NA
2013	12	16	2013-12-16	0.354861	GC	Tofo/Barra	24	0	0	0	0	0	NA
2013	12	18	2013-12-18	0.445139	GC	Tofo/Barra	21	0	0	0	0	0	NA
2013	12	18	2013-12-18	0.291667	MC	Tofo/Barra	25	0	0	0	0	0	NA
2013	12	19	2013-12-19	0.302083	GC	Tofo/Barra	20	0	0	0	0	0	NA
2013	12	19	2013-12-19	0.439583	MC	Tofo/Barra	26	0	0	0	0	0	NA
2013	12	20	2013-12-20	0.321528	MR	Tofo/Barra	24	0	0	0	0	0	NA
2013	12	20	2013-12-20	0.53125	OF	Tofo/Barra	25	0	0	0	0	0	NA
2013	12	21	2013-12-21	0.683333	MRB	Bazaruto Archipelago/San Sebastian	26	0	0	0	0	0	NA
2013	12	22	2013-12-22	0.446528	GC	Tofo/Barra	23	0	0	0	0	0	NA
2013	12	22	2013-12-22	0.346528	MR	Tofo/Barra	25	0	0	0	0	0	NA
2013	12	23	2013-12-23	0.351389	OF	Tofo/Barra	25	0	0	0	0	0	NA
2013	12	24	2013-12-24	0.659722	MRB	Bazaruto Archipelago/San Sebastian	27	0	0	0	0	0	NA
2013	12	26	2013-12-26	0.328472	MR	Tofo/Barra	24	0	0	0	0	0	NA
2013	12	26	2013-12-26	0.375	XTC	Tofo/Barra	23	0	0	0	0	0	NA
2013	12	27	2013-12-27	0.306944	GC	Tofo/Barra	25	0	0	0	0	0	NA
2013	12	27	2013-12-27	0.375	MR	Tofo/Barra	22	0	0	0	0	0	NA
2013	12	28	2013-12-28	0.45	GOB	Bazaruto Archipelago/San Sebastian	25	0	0	0	0	0	NA
2013	12	28	2013-12-28	0.559028	GOB	Bazaruto Archipelago/San Sebastian	26	0	0	0	0	0	NA
2013	12	28	2013-12-28	0.322917	OF	Tofo/Barra	26	0	0	0	0	0	NA
2013	12	29	2013-12-29	0.510417	SP	Bazaruto Archipelago/San Sebastian	22	0	0	0	0	0	NA
2013	12	30	2013-12-30	0.416667	MR	Tofo/Barra	25	0	0	0	0	0	NA
2013	12	30	2013-12-30	0.3375	OF	Tofo/Barra	24	0	0	0	0	0	NA
2013	12	30	2013-12-30	0.486111	SP	Bazaruto Archipelago/San Sebastian	21	0	0	0	0	0	NA
2013	12	31	2013-12-31	0.3125	XTC	Tofo/Barra	22	0	0	0	0	0	NA
2014	1	1	2014-01-01	0.647917	RR	Bazaruto Archipelago/San Sebastian	27	0	0	0	0	0	NA
2014	1	3	2014-01-03	0.340278	MR	Tofo/Barra	25	0	0	0	0	0	NA
2014	1	4	2014-01-04	0.515972	TR	Bazaruto Archipelago/San Sebastian	27	0	0	0	0	0	NA
2014	1	5	2014-01-05	0.69375	SP	Bazaruto Archipelago/San Sebastian	27	0	0	0	0	0	NA
2014	1	7	2014-01-07	0.375694	OF	Tofo/Barra	27	0	0	0	0	0	NA
2014	1	7	2014-01-07	0.404861	SP	Bazaruto Archipelago/San Sebastian	27	0	0	0	0	0	NA
2014	1	7	2014-01-07	0.555556	SP	Bazaruto Archipelago/San Sebastian	27	0	0	0	0	0	NA
2014	1	8	2014-01-08	0.510417	GC	Tofo/Barra	27	0	0	0	0	0	NA
2014	1	8	2014-01-08	0.375	MR	Tofo/Barra	27	0	0	0	0	0	NA
2014	1	8	2014-01-08	0.364583	SP	Bazaruto Archipelago/San Sebastian	24	0	0	0	0	0	NA
2014	1	9	2014-01-09	0.650694	DB	Bazaruto Archipelago/San Sebastian	27	0	0	0	0	0	NA
2014	1	9	2014-01-09	0.400694	RE	Tofo/Barra	28	0	0	0	0	0	NA
2014	1	10	2014-01-10	0.616667	GOB	Bazaruto Archipelago/San Sebastian	27	0	0	0	0	0	NA
2014	1	10	2014-01-10	0.367361	SP	Bazaruto Archipelago/San Sebastian	27	1	1	1	0	0	Yes	20140110_PI_Dm_M_Claspers_CAL_IMG_2873 and 20140110_PI_Dm_M_DorsalID_KE_GOPR0932
2014	1	11	2014-01-11	0.500694	GC	Tofo/Barra	26	0	0	0	0	0	NA
2014	1	11	2014-01-11	0.394444	MR	Tofo/Barra	26	0	0	0	0	0	NA
2014	1	11	2014-01-11	0.379861	SP	Bazaruto Archipelago/San Sebastian	22	0	0	0	0	0	NA
2014	1	12	2014-01-12	0.382639	DB	Bazaruto Archipelago/San Sebastian	28	0	0	0	0	0	NA
2014	1	13	2014-01-13	0.359722	GC	Tofo/Barra	24	0	0	0	0	0	NA
2014	1	13	2014-01-13	0.407639	MR	Tofo/Barra	27	0	0	0	0	0	NA
2014	1	13	2014-01-13	0.564583	SP	Bazaruto Archipelago/San Sebastian	27	0	0	0	0	0	NA
2014	1	14	2014-01-14	0.400694	MRB	Bazaruto Archipelago/San Sebastian	27	0	0	0	0	0	NA
2014	1	14	2014-01-14	0.365972	SF	Tofo/Barra	26	0	0	0	0	0	NA
2014	1	15	2014-01-15	0.374306	OF	Tofo/Barra	27	0	0	0	0	0	NA
2014	1	16	2014-01-16	0.425694	DB	Bazaruto Archipelago/San Sebastian	27	0	0	0	0	0	NA
2014	1	16	2014-01-16	0.4	MR	Tofo/Barra	28	0	0	0	0	0	NA
2014	1	16	2014-01-16	0.525	TR	Bazaruto Archipelago/San Sebastian	27	0	0	0	0	0	NA
2014	1	18	2014-01-18	0.515278	GC	Tofo/Barra	22	0	0	0	0	0	NA
2014	1	18	2014-01-18	0.405556	MR	Tofo/Barra	24	0	0	0	0	0	NA
2014	1	19	2014-01-19	0.354167	GC	Tofo/Barra	26	0	0	0	0	0	NA
2014	1	22	2014-01-22	0.416667	CO	Tofo/Barra	26	0	0	0	0	0	NA
2014	1	22	2014-01-22	0.384028	OF	Tofo/Barra	26	0	0	0	0	0	NA
2014	1	22	2014-01-22	0.51875	OF	Tofo/Barra	27	0	0	0	0	0	NA
2014	1	23	2014-01-23	0.627083	MC	Tofo/Barra	26	0	0	0	0	0	NA
2014	1	23	2014-01-23	0.393056	MR	Tofo/Barra	27	0	0	0	0	0	NA
2014	1	24	2014-01-24	0.388889	RE	Tofo/Barra	27	0	0	0	0	0	NA
2014	1	24	2014-01-24	0.388194	XTC	Tofo/Barra	26	0	0	0	0	0	NA
2014	1	29	2014-01-29	0.35625	GC	Tofo/Barra	25	0	0	0	0	0	NA
2014	1	30	2014-01-30	0.391667	GC	Tofo/Barra	21	0	0	0	0	0	NA
2014	1	30	2014-01-30	0.423611	GC	Tofo/Barra	21	0	0	0	0	0	NA
2014	1	30	2014-01-30	0.475694	GC	Tofo/Barra	23	0	0	0	0	0	NA
2014	1	30	2014-01-30	0.513889	SF	Tofo/Barra	21	0	0	0	0	0	NA
2014	2	1	2014-02-01	0.378472	GC	Tofo/Barra	22	0	0	0	0	0	NA
2014	2	1	2014-02-01	0.398611	GC	Tofo/Barra	28	0	0	0	0	0	NA
2014	2	4	2014-02-04	0.392361	OF	Tofo/Barra	28	0	0	0	0	0	NA
2014	2	4	2014-02-04	0.489583	RE	Tofo/Barra	27	0	0	0	0	0	NA
2014	2	5	2014-02-05	0.395833	MR	Tofo/Barra	23	0	0	0	0	0	NA
2014	2	5	2014-02-05	0.484722	RR	Bazaruto Archipelago/San Sebastian	27	0	0	0	0	0	NA
2014	2	5	2014-02-05	0.415972	SP	Bazaruto Archipelago/San Sebastian	28	0	0	0	0	0	NA
2014	2	6	2014-02-06	0.447917	OF	Tofo/Barra	26	0	0	0	0	0	NA
2014	2	7	2014-02-07	0.367361	SP	Bazaruto Archipelago/San Sebastian	28	1	1	0	0	1	No
2014	2	7	2014-02-07	0.438889	SP	Bazaruto Archipelago/San Sebastian	28	0	0	0	0	0	NA
2014	2	7	2014-02-07	0.402083	XTC	Tofo/Barra	23	0	0	0	0	0	NA
2014	2	8	2014-02-08	0.524306	Seagrass inside Baz	Bazaruto Archipelago/San Sebastian	28	0	0	0	0	0	NA
2014	2	8	2014-02-08	0.397222	SP	Bazaruto Archipelago/San Sebastian	28	0	0	0	0	0	NA
2014	2	8	2014-02-08	0.460417	SP	Bazaruto Archipelago/San Sebastian	28	0	0	0	0	0	NA
2014	2	11	2014-02-11	0.423611	RE	Tofo/Barra	27	0	0	0	0	0	NA
2014	2	11	2014-02-11	0.423611	RE	Tofo/Barra	27	0	0	0	0	0	NA
2014	2	12	2014-02-12	0.354167	CO	Tofo/Barra	26	0	0	0	0	0	NA
2014	2	14	2014-02-14	0.511806	GC	Tofo/Barra	27	0	0	0	0	0	NA
2014	2	14	2014-02-14	0.392361	MR	Tofo/Barra	21	0	0	0	0	0	NA
2014	2	15	2014-02-15	0.518056	GC	Tofo/Barra	27	0	0	0	0	0	NA
2014	2	15	2014-02-15	0.416667	MR	Tofo/Barra	27	0	0	0	0	0	NA
2014	2	16	2014-02-16	0.584722	GC	Tofo/Barra	23	0	0	0	0	0	NA
2014	2	16	2014-02-16	0.484028	RE	Tofo/Barra	23	0	0	0	0	0	NA
2014	2	17	2014-02-17	0.379861	GC	Tofo/Barra	27	0	0	0	0	0	NA
2014	2	18	2014-02-18	0.370833	OF	Tofo/Barra	25	0	0	0	0	0	NA
2014	2	18	2014-02-18	0.621528	TT	Tofo/Barra	22	0	0	0	0	0	NA
2014	2	19	2014-02-19	0.565278	GC	Tofo/Barra	26	0	0	0	0	0	NA
2014	2	19	2014-02-19	0.471528	MR	Tofo/Barra	27	0	0	0	0	0	NA
2014	2	19	2014-02-19	0.347222	XTC	Tofo/Barra	21	0	0	0	0	0	NA
2014	2	21	2014-02-21	0.359722	SF	Tofo/Barra	26	0	0	0	0	0	NA
2014	2	25	2014-02-25	0.51875	AL	Bazaruto Archipelago/San Sebastian	28	0	0	0	0	0	NA
2014	2	25	2014-02-25	0.394444	OF	Tofo/Barra	26	0	0	0	0	0	NA
2014	2	25	2014-02-25	0.439583	QU	Bazaruto Archipelago/San Sebastian	26	0	0	0	0	0	NA
2014	2	25	2014-02-25	0.577083	SP	Bazaruto Archipelago/San Sebastian	21	0	0	0	0	0	NA
2014	2	26	2014-02-26	0.363889	GC	Tofo/Barra	26	0	0	0	0	0	NA
2014	2	26	2014-02-26	0.410417	MO	Bazaruto Archipelago/San Sebastian	28	0	0	0	0	0	NA
2014	2	26	2014-02-26	0.486806	MO	Bazaruto Archipelago/San Sebastian	26	0	0	0	0	0	NA
2014	2	26	2014-02-26	0.556944	TFM	Bazaruto Archipelago/San Sebastian	25	0	0	0	0	0	NA
2014	2	27	2014-02-27	0.388889	MR	Tofo/Barra	27	0	0	0	0	0	NA
2014	2	28	2014-02-28	0.391667	AM	Tofo/Barra	26	0	0	0	0	0	NA
2014	2	28	2014-02-28	0.407639	BR	Bazaruto Archipelago/San Sebastian	27	0	0	0	0	0	NA
2014	2	28	2014-02-28	0.499306	BR	Bazaruto Archipelago/San Sebastian	27	0	0	0	0	0	NA
2014	3	2	2014-03-02	0.496528	ST	Tofo/Barra	26	0	0	0	0	0	NA
2014	3	2	2014-03-02	0.402083	XTC	Zavora	25	0	0	0	0	0	NA
2014	3	3	2014-03-03	0.369444	GC	Tofo/Barra	26	0	0	0	0	0	NA
2014	3	4	2014-03-04	0.388194	MR	Tofo/Barra	24	0	0	0	0	0	NA
2014	3	5	2014-03-05	0.459722	PDR	Tofo/Barra	25	0	0	0	0	0	NA
2014	3	5	2014-03-05	0.379861	RB	Tofo/Barra	25	0	0	0	0	0	NA
2014	3	6	2014-03-06	0.383333	OF	Tofo/Barra	23	0	0	0	0	0	NA
2014	3	7	2014-03-07	0.513889	TO	Tofo/Barra	23	0	0	0	0	0	NA
2014	3	7	2014-03-07	0.388194	XTC	Tofo/Barra	28	0	0	0	0	0	NA
2014	3	8	2014-03-08	0.381944	MR	Tofo/Barra	25	0	0	0	0	0	NA
2014	3	8	2014-03-08	0.470139	PDR	Tofo/Barra	26	0	0	0	0	0	NA
2014	3	9	2014-03-09	0.359028	GC	Tofo/Barra	27	1	1	1	0	0	Yes	20140309_GC_Dm_U_DorsalID_HD_P1040024
2014	3	9	2014-03-09	0.390972	SP	Bazaruto Archipelago/San Sebastian	27	0	0	0	0	0	NA
2014	3	9	2014-03-09	0.438889	SP	Bazaruto Archipelago/San Sebastian	26	0	0	0	0	0	NA
2014	3	10	2014-03-10	0.383333	XTC	Tofo/Barra	23	0	0	0	0	0	NA
2014	3	11	2014-03-11	0.320833	MR	Tofo/Barra	25	0	0	0	0	0	NA
2014	3	16	2014-03-16	0.577778	GC	Tofo/Barra	28	0	0	0	0	0	NA
2014	3	16	2014-03-16	0.486111	RE	Tofo/Barra	28	0	0	0	0	0	NA
2014	3	16	2014-03-16	0.350694	SB	Bazaruto Archipelago/San Sebastian	28	0	0	0	0	0	NA
2014	3	16	2014-03-16	0.414583	SP	Bazaruto Archipelago/San Sebastian	26	0	0	0	0	0	NA
2014	3	16	2014-03-16	0.461806	SP	Bazaruto Archipelago/San Sebastian	26	0	0	0	0	0	NA
2014	3	17	2014-03-17	0.663194	GOB	Bazaruto Archipelago/San Sebastian	24	0	0	0	0	0	NA
2014	3	17	2014-03-17	0.378472	OF	Tofo/Barra	26	0	0	0	0	0	NA
2014	3	18	2014-03-18	0.383333	OF	Tofo/Barra	25	0	0	0	0	0	NA
2014	3	19	2014-03-19	0.383333	MR	Tofo/Barra	26	0	0	0	0	0	NA
2014	3	20	2014-03-20	0.593056	GC	Tofo/Barra	24	0	0	0	0	0	NA
2014	3	20	2014-03-20	0.677083	GOB	Bazaruto Archipelago/San Sebastian	24	0	0	0	0	0	NA
2014	3	20	2014-03-20	0.384722	MR	Tofo/Barra	26	0	0	0	0	0	NA
2014	3	24	2014-03-24	0.372917	GC	Tofo/Barra	23	0	0	0	0	0	NA
2014	3	29	2014-03-29	0.378472	SP	Bazaruto Archipelago/San Sebastian	27	0	0	0	0	0	NA
2014	3	31	2014-03-31	0.367361	SF	Tofo/Barra	27	0	0	0	0	0	NA
2014	3	31	2014-03-31	0.547222	SF	Tofo/Barra	27	0	0	0	0	0	NA
2014	4	2	2014-04-02	0.360417	GC	Tofo/Barra	28	0	0	0	0	0	NA
2014	4	2	2014-04-02	0.322917	SP	Bazaruto Archipelago/San Sebastian	28	0	0	0	0	0	NA
2014	4	3	2014-04-03	0.418056	GOB	Bazaruto Archipelago/San Sebastian	26	0	0	0	0	0	NA
2014	4	3	2014-04-03	0.396528	MR	Tofo/Barra	26	0	0	0	0	0	NA
2014	4	3	2014-04-03	0.364583	SP	Bazaruto Archipelago/San Sebastian	27	0	0	0	0	0	NA
2014	4	4	2014-04-04	0.547222	GC	Tofo/Barra	28	0	0	0	0	0	NA
2014	4	4	2014-04-04	0.415278	GOB	Bazaruto Archipelago/San Sebastian	28	0	0	0	0	0	NA
2014	4	4	2014-04-04	0.363194	OF	Tofo/Barra	22	0	0	0	0	0	NA
2014	4	4	2014-04-04	0.4875	RE	Tofo/Barra	26	0	0	0	0	0	NA
2014	4	5	2014-04-05	0.366667	GC	Tofo/Barra	28	0	0	0	0	0	NA
2014	4	6	2014-04-06	0.378472	GC	Tofo/Barra	28	0	0	0	0	0	NA
2014	4	6	2014-04-06	0.54375	SF	Tofo/Barra	27	0	0	0	0	0	NA
2014	4	6	2014-04-06	0.618056	SP	Bazaruto Archipelago/San Sebastian	27	0	0	0	0	0	NA
2014	4	8	2014-04-08	0.520139	GWS	Zavora	26	0	0	0	0	0	NA
2014	4	8	2014-04-08	0.429167	YO	Zavora	26	0	0	0	0	0	NA
2014	4	9	2014-04-09	0.49375	GWN	Zavora	26	0	0	0	0	0	NA
2014	4	9	2014-04-09	0.540972	RS	Zavora	27	0	0	0	0	0	NA
2014	4	9	2014-04-09	0.420139	TC	Zavora	27	0	0	0	0	0	NA
2014	4	11	2014-04-11	0.402778	MR	Tofo/Barra	25	0	0	0	0	0	NA
2014	4	14	2014-04-14	0.365972	MS	Tofo/Barra	26	0	0	0	0	0	NA
2014	4	14	2014-04-14	0.482639	NK	Tofo/Barra	22	0	0	0	0	0	NA
2014	4	15	2014-04-15	0.494444	BB	Bazaruto Archipelago/San Sebastian	26	0	0	0	0	0	NA
2014	4	15	2014-04-15	0.417361	GOB	Bazaruto Archipelago/San Sebastian	27	0	0	0	0	0	NA
2014	4	15	2014-04-15	0.388889	MR	Tofo/Barra	27	0	0	0	0	0	NA
2014	4	15	2014-04-15	0.399306	SSD	Tofo/Barra	22	0	0	0	0	0	NA
2014	4	15	2014-04-15	0.51875	SSS	Tofo/Barra	26	0	0	0	0	0	NA
2014	4	16	2014-04-16	0.565972	NR	Tofo/Barra	23	0	0	0	0	0	NA
2014	4	16	2014-04-16	0.402083	OF	Tofo/Barra	26	0	0	0	0	0	NA
2014	4	16	2014-04-16	0.294444	RP	Tofo/Barra	26	0	0	0	0	0	NA
2014	4	16	2014-04-16	0.436111	TJ	Tofo/Barra	24	0	0	0	0	0	NA
2014	4	17	2014-04-17	0.378472	GC	Tofo/Barra	27	0	0	0	0	0	NA
2014	4	17	2014-04-17	0.30625	SP	Bazaruto Archipelago/San Sebastian	26	0	0	0	0	0	NA
2014	4	18	2014-04-18	0.669444	3P	Bazaruto Archipelago/San Sebastian	26	0	0	0	0	0	NA
2014	4	18	2014-04-18	0.349306	AB	Bazaruto Archipelago/San Sebastian	26	0	0	0	0	0	NA
2014	4	18	2014-04-18	0.509722	BP	Bazaruto Archipelago/San Sebastian	26	0	0	0	0	0	NA
2014	4	18	2014-04-18	0.497222	GC	Tofo/Barra	27	0	0	0	0	0	NA
2014	4	18	2014-04-18	0.392361	MR	Tofo/Barra	27	0	0	0	0	0	NA
2014	4	18	2014-04-18	0.400694	RS	Zavora	27	0	0	0	0	0	NA
2014	4	18	2014-04-18	0.483333	RS	Zavora	26	0	0	0	0	0	NA
2014	4	18	2014-04-18	0.55625	RS	Zavora	27	0	0	0	0	0	NA
2014	4	18	2014-04-18	0.299306	SP	Bazaruto Archipelago/San Sebastian	27	0	0	0	0	0	NA
2014	4	18	2014-04-18	0.531944	TB	Bazaruto Archipelago/San Sebastian	26	0	0	0	0	0	NA
2014	4	19	2014-04-19	0.559722	3P	Bazaruto Archipelago/San Sebastian	26	0	0	0	0	0	NA
2014	4	19	2014-04-19	0.448611	BR	Bazaruto Archipelago/San Sebastian	27	0	0	0	0	0	NA
2014	4	20	2014-04-20	0.340278	SP	Bazaruto Archipelago/San Sebastian	26	0	0	0	0	0	NA
2014	4	20	2014-04-20	0.597222	SP	Bazaruto Archipelago/San Sebastian	26	0	0	0	0	0	NA
2014	4	21	2014-04-21	0.572917	GOB	Bazaruto Archipelago/San Sebastian	26	0	0	0	0	0	NA
2014	4	21	2014-04-21	0.383333	MR	Tofo/Barra	26	0	0	0	0	0	NA
2014	4	21	2014-04-21	0.604167	QU	Bazaruto Archipelago/San Sebastian	27	0	0	0	0	0	NA
2014	4	21	2014-04-21	0.416667	SP	Bazaruto Archipelago/San Sebastian	26	0	0	0	0	0	NA
2014	4	21	2014-04-21	0.614583	ST	Tofo/Barra	26	0	0	0	0	0	NA
2014	4	22	2014-04-22	0.335417	SP	Bazaruto Archipelago/San Sebastian	27	0	0	0	0	0	NA
2014	4	22	2014-04-22	0.48125	SP	Bazaruto Archipelago/San Sebastian	26	0	0	0	0	0	NA
2014	4	22	2014-04-22	0.65625	SP	Bazaruto Archipelago/San Sebastian	26	0	0	0	0	0	NA
2014	4	23	2014-04-23	0.381944	SP	Bazaruto Archipelago/San Sebastian	27	0	0	0	0	0	NA
2014	4	23	2014-04-23	0.494444	SP	Bazaruto Archipelago/San Sebastian	26	0	0	0	0	0	NA
2014	4	25	2014-04-25	0.489583	MR	Bazaruto Archipelago/San Sebastian	27	0	0	0	0	0	NA
2014	4	25	2014-04-25	0.370139	OF	Tofo/Barra	24	0	0	0	0	0	NA
2014	4	25	2014-04-25	0.402083	SP	Bazaruto Archipelago/San Sebastian	26	0	0	0	0	0	NA
2014	4	26	2014-04-26	0.485417	GC	Tofo/Barra	26	0	0	0	0	0	NA
2014	4	26	2014-04-26	0.393056	MR	Tofo/Barra	23	0	0	0	0	0	NA
2014	4	26	2014-04-26	0.535417	MR	Bazaruto Archipelago/San Sebastian	27	0	0	0	0	0	NA
2014	4	27	2014-04-27	0.381944	AM	Tofo/Barra	26	0	0	0	0	0	NA
2014	4	27	2014-04-27	0.569444	GOB	Bazaruto Archipelago/San Sebastian	23	0	0	0	0	0	NA
2014	4	27	2014-04-27	0.467361	OF	Tofo/Barra	26	0	0	0	0	0	NA
2014	4	29	2014-04-29	0.372222	GC	Tofo/Barra	26	0	0	0	0	0	NA
2014	4	29	2014-04-29	0.38125	RE	Tofo/Barra	26	0	0	0	0	0	NA
2014	4	30	2014-04-30	0.377083	GOB	Bazaruto Archipelago/San Sebastian	25	0	0	0	0	0	NA
[truncated: 1,796 more rows]

## Sheet: Citizen contributions
Marine Action Research - Smalleye sightings in Zavora
Year	Month	Day	Date	Time	Site	Region	BST	M. microps Presence	Number M. microps	Male	Female	Unknown	Photos?	ID Photo
2011	3	25	2011-03-25	13:09:00	GWS	Zavora	24	1	1	0	0	1	No	NA
2011	4	15	2011-04-15	09:30:00	DRS	Zavora	25	1	1	0	0	1	No	NA
2011	6	8	2011-06-08	08:00:00	Yogis	Zavora	22	1	1	0	0	1	No	NA
2011	10	8	2011-10-08	10:15:00	RS	Zavora	24	1	1	0	0	1	No	NA
2016	9	13	2016-09-13	11:00:00	RS	Zavora	22	1	1	0	0	1	Yes	20160913_WitchsHat_Dm_U_DorsalID
2017	7	26	2017-07-26	09:30:00	GWS	Zavora	23	1	1	0	0	1	No	NA
2017	11	22	2017-11-22	09:20:00	Deans	Zavora	23	1	1	0	0	1	Yes	20171122_Deans_Dm_U_LeftID2
2018	5	21	2018-05-21	09:23:00	Deans	Zavora	25	1	1	0	0	1	No	NA
2018	6	20	2018-06-20	11:28:00	RS	Zavora	23	1	1	0	0	1	Yes	20180620_WitchsHat_Dm_U_RightID2
2018	8	22	2018-08-22	08:21:00	DRS	Zavora	21	1	1	0	0	1	Yes	20180822_DeepReefSouth_Dm_U_RightID
Individual citizen contributions - Smalleye photographs
Year	Month	Day	Date	Time	Site	Region	BST	M. microps Presence	Number M. microps	Male	Female	Unknown	Photos?	ID Photo
2009	5	1	2009-05-01	NA	GC	Tofo/Barra	NA	1	1	0	0	1	Yes	20090501_GC_Dm_U_DorsalID_
2009	9	5	2009-09-05	NA	GC	Tofo/Barra	NA	1	1	0	0	1	Yes	20090905_GC_Dm_U_DorsalID_INaturalist
2010	5	21	2010-05-21	NA	GC	Tofo/Barra	NA	1	1	1	0	0	Yes	20100521_GC_Dm_M_LeftID_1
2012	3	7	2012-03-07	NA	XTC	Tofo/Barra	NA	1	1	1	0	0	Yes	20120307_XTC_Dm_M_DorsalID_DVD
2012	3	22	2012-03-22	NA	MR	Tofo/Barra	NA	1	1	0	1	0	Yes	20120321_MR_Dm_F_LeftID_possibly_pregnant_AM
2012	3	23	2012-03-23	NA	RB	Tofo/Barra	NA	1	1	0	0	1	Yes	20120322_RB_Dm_U_DorsalID_
2012	7	21	2012-07-21	NA	?	Tofo/Barra	NA	1	1	0	0	1	Yes	20120721__Dm_U_DorsalID_
2012	7	21	2012-07-21	NA	GC	Tofo/Barra	NA	1	1	0	0	1	Yes	20120721_GC_Dm_U_DorsalID_
2015	1	5	2015-01-05	NA	RB	Tofo/Barra	NA	1	1	0	0	1	Yes	20150105_RB_U_Dm_DorsalID
2015	1	8	2015-01-08	NA	Surface (North)	Tofo/Barra	NA	1	1	0	0	1	Yes	20150108_Surface_U_Dm_DorsalID
2015	12	19	2015-12-19	NA	XTC	Tofo/Barra	NA	1	1	0	0	1	Yes	20151219_XTC_U_Dm_DorsalID
2017	9	3	2017-09-03	NA	SP	Bazaruto Archipelago/San Sebastian	NA	1	1	1	0	0	Yes	20170903_SP_Dm_M_DorsalID_JC
2017	12	15	2017-12-15	NA	GC	Tofo/Barra	NA	1	1	1	0	0	Yes	20171215_GC_Mm_U_DorsalIDContrast_MJ_GOPR0503
2018	7	13	2018-07-13	10:12:00	SW	Tofo/Barra	23	1	2	0	0	2	Yes	20180713_SW_Dm1_U_DorsalID_Barra Jo, 20180922_SW_Dm2_U_RightID2_Jo
2018	8	28	2018-08-28	NA	GC	Tofo/Barra	NA	1	1	0	0	1	Yes	20180828_GC_Dm_U_Julien
2018	9	22	2018-09-22	NA	RB	Tofo/Barra	NA	1	1	0	0	1	Yes	20180922_RB_U_Dm_LeftID_pic1

## Sheet: Sightings records (Table 1)
Total Number of M. microps sightings	Site					Year	Zavora	Tofo Beach/Barra	Bazaruto Archipelago - San Sebastian	Total
Year	Bazaruto Archipelago/San Sebastian	Tofo/Barra	Zavora	Total		2003	0	0	0	0
2003		0		0		2004	0	1	0	1
2004		1		1		2005	0	1	0	1
2005		1		1		2006	0	1	0	1
2006		1		1		2007	0	7	0	7
2007		7		7		2008	0	2	0	2
2008		2		2		2009	0	1	0	1
2009		1		1		2010	0	6	0	6
2010		6	0	6		2011	0	13	0	13
2011		13		13		2012	0	17	0	17
2012	0	17		17		2013	2	20	3	25
2013	3	20	2	25		2014	0	16	3	19
2014	3	16	0	19		2015	0	6	0	6
2015	0	6	0	6		2016	0	17	0	17
2016	0	17	0	17		2017	0	18	1	19
2017	1	18	0	19		2018	0	20	0	20
2018	0	20	0	20		Total Sightings	2	146	7	155
Total	7	146	2	155		M. Microps identified (N)	5	60	5	70

## Sheet: Seasonal Trends (Figure 4b)
										Number of dives
	Month	Total number of dives/month	Total sightings / total dives of the month	2003	2004	2005	2006	2007	2008	2009	2010	2011	2012	2013	2014	2015	2016	2017	2018	Total
	January	298	0.0167785	0	9	16	7	15	0	0	18	33	13	10	42	38	27	26	44	298
	February	268	0.0149254	0	0	2	12	10	6	21	9	6	26	24	42	19	37	23	31	268
	March	302	0.0231788	0	0	0	10	26	8	0	19	43	29	41	32	12	32	23	27	302
	April	340	0.0176471	0	0	1	0	4	0	15	27	40	43	19	69	24	24	32	42	340
	May	418	0.0406699	5	16	6	0	0	0	3	24	51	40	37	43	39	36	58	60	418
	June	290	0.0413793	0	0	11	0	0	0	11	29	33	36	35	33	13	22	28	39	290
	July	235	0.110638	0	7	5	0	0	0	0	8	17	39	34	34	15	16	39	21	235
	August	222	0.0990991	12	0	0	4	0	0	7	5	17	14	17	27	13	23	40	43	222
	September	298	0.0637584	0	5	0	5	25	0	4	0	11	29	38	32	11	31	42	65	298
	October	442	0.040724	0	24	12	26	34	7	3	10	35	40	33	39	23	44	49	63	442
	November	384	0.0390625	2	16	25	14	11	24	0	17	49	37	28	40	24	44	38	15	384
	December	298	0.0134228	14	19	16	13	0	5	0	10	16	35	38	40	24	28	40	0	298
		3795																		3795
										Number of sightings
			Month	2003	2004	2005	2006	2007	2008	2009	2010	2011	2012	2013	2014	2015	2016	2017	2018	Total
			January									1			1			2	1	5
			February											1	1		1		1	4
			March				0	2	0		0	3	1	0	1	0	0	0	0	7
			April			0		1		0	1	0	2	0	0	0	0	1	1	6
			May	0	0	0				0	1	1	1	4	1	2	1	3	3	17
			June			0				1	2	0	0	2	1	0	4	0	2	12
			July		0	0					2	4	4	6	3	0	2	3	2	26
			August	0			1			0	0	2	3	4	3	0	1	2	6	22
			September		0		0	2		0		0	0	4	3	3	2	5	0	19
			October		1	0	0	2	0	0	0	1	5	1	0	0	3	1	4	18
			November	0	0	1	0	0	1		0	1	1	3	3	1	2	2	0	15
			December	0	0	0	0		1		0	0	0	0	2	0	1	0		4
																				155
											SPUE = sightings per unit of effort (dive transect)
			Month	2003	2004	2005	2006	2007	2008	2009	2010	2011	2012	2013	2014	2015	2016	2017	2018	Mean number of rays seen per dive/month (Mean SPUE)	Median SPUE
			January		0	0	0	0			0	0.030303	0	0	0.0238095	0	0	0.0769231	0.0227273	0.0118279	0
			February			0	0	0	0	0	0	0	0	0.0416667	0.0238095	0	0.027027	0	0.0322581	0.00891152	0
			March				0	0.0769231	0		0	0.0697674	0.0344828	0	0.03125	0	0	0	0	0.0177019	0
			April			0		0.25		0	0.037037	0	0.0465116	0	0	0	0	0.03125	0.0238095	0.032384	0
			May	0	0	0				0	0.0416667	0.0196078	0.025	0.108108	0.0232558	0.0512821	0.0277778	0.0517241	0.05	0.0306479	0.025
			June			0				0.0909091	0.0689655	0	0	0.0571429	0.030303	0	0.181818	0	0.0512821	0.0436746	0.030303
			July		0	0					0.25	0.235294	0.102564	0.176471	0.0882353	0	0.125	0.0769231	0.0952381	0.10452	0.0952381
			August	0			0.25			0	0	0.117647	0.214286	0.235294	0.111111	0	0.0434783	0.05	0.139535	0.0967793	0.0805556
			September		0		0	0.08		0		0	0	0.105263	0.09375	0.272727	0.0645161	0.119048	0	0.0612753	0.0322581
			October		0.0416667	0	0	0.0588235	0	0	0	0.0285714	0.125	0.030303	0	0	0.0681818	0.0204082	0.0634921	0.0290964	0.0204082
			November	0	0	0.04	0	0	0.0416667		0	0.0204082	0.027027	0.107143	0.075	0.0416667	0.0454545	0.0526316	0	0.0300665	0.027027
			December	0	0	0	0		0.2		0	0	0	0	0.05	0	0.0357143	0		0.021978	0
