# Supplementary material for: Spotting the “small eyes”: using photo-ID methodology to study a wild population of smalleye stingrays (Megatrygon microps) in southern Mozambique
Source: PeerJ. 2019 Jun 11;7:e7110. doi: 10.7717/peerj.7110 (PMC6568249; doi:10.7717/peerj.7110)
Supplement: Table S1 — Basic information collected on the 70 identified individuals were computed in this table: sex, partial/full ID-photos, dates of sightings. [file peerj-07-7110-s002.xlsx]

## Sheet: IDs
Smalleye stingray - Identified individuals
ID individual	Sex	Disc Width (cm)	Full dorsal ID	Right ID	Left ID	First sighting	Second sighting	Third sighting	Fourth sighting	Notes
#001	U	U	Yes	No	No	2008-12-09
#002	U	U	Yes	No	No	2009-05-01
#003	U	U	Yes	No	No	2010-05-05
#004	M	U	No	Yes	Yes	2010-05-21
#005	U	U	Yes	No	No	2010-06-23
#006	F	200	Yes	Yes	Yes	2009-09-05	2010-07-29	2012-07-15	2013-05-18	First sighting = Inaturalist © bja2800dk
#007	U	U	Yes	No	No	2011-03-12	2012-11-15
#008	M	U	Yes	No	Yes	2011-05-07	2012-10-26
#009	U	U	Yes	No	No	2011-07-28
#010	F	U	Yes	No	Yes	2011-08-11
#011	U	U	Yes	No	No	2011-11-28
#012	U	U	Yes	No	No	2012-07-21
#013	M	U	Yes	No	No	2012-03-07
#014	U	U	Yes	Yes	No	2012-03-21	2012-03-22	2014-09-28	2017-11-22	Visually identified as pregnant (2012)
#015	U	U	Yes	No	No	2012-04-27
#016	U	U	Yes	No	No	2012-05-05
#017	F	U	Yes	Yes	No	2012-07-21	2014-08-12	2018-08-13
#018	F	U	Yes	No	No	2012-07-23	2017-05-21			Visually identified as pregnant (2017)
#019	F	U	Yes	No	No	2012-08-22
#020	U	U	Yes	No	No	2012-10-24
#021	M	U	Yes	No	No	2012-10-30
#022	U	U	Yes	No	No	2012-10-30
#023	U	213	Yes	No	Yes	2013-05-04				Size measured with lasers
#024	F	250+	Yes	Yes	Yes	2007-10-28
#025	M	U	Yes	No	No	2008-11-10	2013-06-20
#026	M	U	Yes	No	No	2013-07-11
#027	F	U	Yes	No	No	2013-07-11
#028	F	U	Yes	No	No	2013-07-18
#029	F	U	Yes	No	No	2013-07-18
#030	M	U	Yes	No	No	2013-07-18
#031	M	U	Yes	No	No	2013-09-05
#032	U	U	Yes	No	No	2013-09-05				Bite scar on left pectoral fin (healed)
#033	U	U	Yes	No	No	2013-10-25
#034	F	U	Yes	No	No	2013-11-05
#035	F	150	Yes	Yes	No	2013-11-11	2014-09-17	2017-07-24	2017-10-01
#036	M	U	Yes	No	No	2013-11-13
#037	M	200	Yes	No	No	2014-01-10
#038	U	U	Yes	No	No	2014-03-10	2018-07-13
#039	U	U	Yes	No	No	2014-05-06
#040	F	U	Yes	No	No	2014-07-18	2016-06-22	2018-08-02
#041	F	U	Yes	No	No	2014-08-12
#042	F	U	Yes	No	No	2014-08-13
#043	U	U	Yes	No	No	2015-01-05
#044	U	U	Yes	No	No	2015-01-08
#045	U	U	Yes	No	Yes	2015-05-11
#046	U	U	Yes	No	Yes	2015-12-19
#047	M	U	Yes	No	No	2016-08-16
#048	F	U	Yes	No	No	2016-09-15	2017-11-02	2018-08-13
#049	F	U	No	Yes	Yes	2016-10-11
#050	U	U	Yes	No	No	2016-12-02
#051	F	U	Yes	No	No	2017-01-20
#052	F	U	Yes	No	No	2017-01-24	2017-06-05	2018-07-13		Visually identified as pregnant (2017)
#053	M	U	Yes	No	No	2017-09-03
#054	M	250	Yes	Yes	No	2017-07-19
#055	F	U	Yes	No	No	2016-06-22
#056	U	U	Yes	No	No	2017-08-28	2018-09-22
#057	F	U	Yes	No	Yes	2017-11-02
#058	M	U	Yes	No	No	2017-12-15
#059	F	U	Yes	No	No	2018-01-06
#060	U	U	Yes	No	No	2018-05-07	2018-05-31
#061	U	U	Yes	Yes	No	2018-06-25
#062	F	U	Yes	No	Yes	2018-08-02				Visually identified as pregnant (2018)
#063	M	U	Yes	No	No	2018-08-18				Bite scar on trailing edge Right (healed)
#064	U	U	Yes	No	No	2018-08-25
#065	F	U	Yes	No	No	2018-08-28	2018-10-03
#066	M	U	Yes	No	No	2018-10-02
#067	U	U	Yes	Yes	No	2018-06-20
#068	U	U	Yes	No	No	2016-09-13
#069	U	U	No	Yes	Yes	2018-08-22
#070	M	180-190	Yes	Yes	Yes	2007-09-27
